# Supplementary material
Source: PubMed Central journal article supplement (PMC6421544)
Supplement: ml8b00488_si_001.pdf [file ml8b00488_si_001.pdf]

## Supporting Information 1: Cluster assignment vs distance to Lilly collection plots

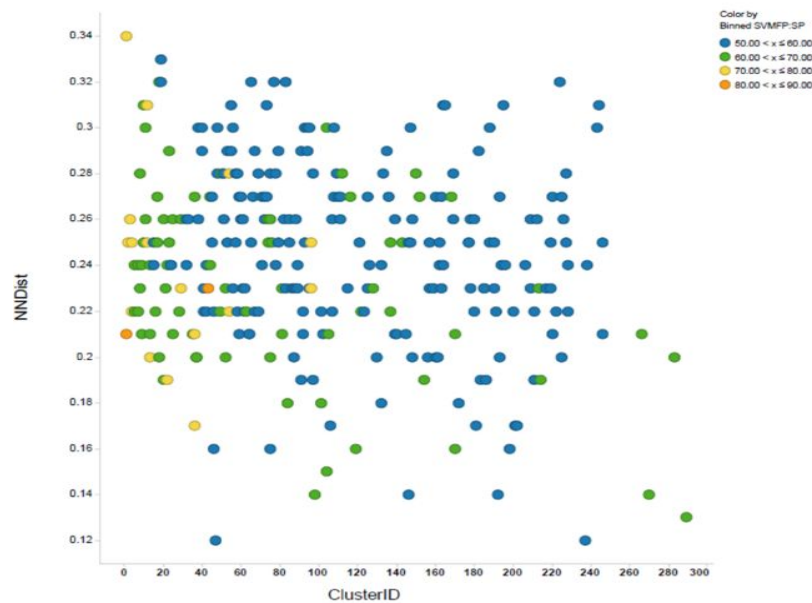

(a) Plot of cluster number vs NN distance to the Lilly collection of the selected PLC set of 285 compounds. Compounds are colored by their predicted ULK1 activity.

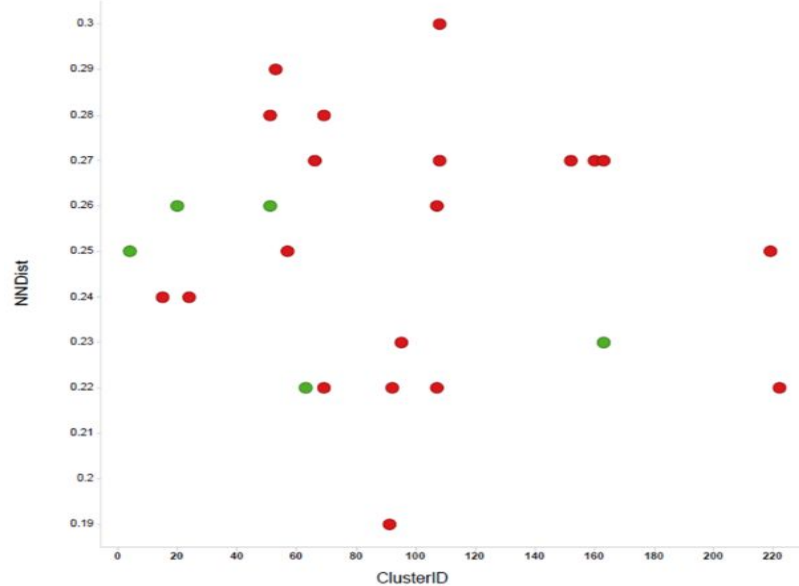

(b) Plot of cluster number vs NN distance of compounds prepared. ULK1 active compounds are in green, inactive in red.

## Supporting Information 2: Methods

### Computational

The computational tools used included structural fingerprint computation methods, distance calculation, substructure searching, clustering and predictive models. All code has been developed internally. For more information on the fingerprint computation methods and SVM predictive model implementations see <sup>19</sup>. Distance calculations were performed using the Tanimoto coefficient. For more information on substructure searching implementation see <sup>4, 21</sup>. Clustering was performed with an inhouse implementation of the sphere exclusion algorithm using 0.15 as the distance threshold (sphere radius) [MacCuish and MacCuish 2014]. An expanded human expert team which included both medicinal and organic chemists manually selected the compounds to synthesize from each cluster. PLC search for near neighbors of the hits identified in round 1 was performed using method ExpandSearch as described in <sup>4</sup>. Parts of the above code, namely substructure search and clustering, has been released to the public domain at [<https://github.com/EliLillyCo/LillyMol>]

### Synthesis

Synthesis was performed on the ASL with a scale ranging from 0.3-0.5 mmol of the rate limiting agent. As the ASL integrates the automated synthesis, LCMS analysis and visualization, solid phase extraction work-up, and evaporation in one system, a chemist was able to check the LCMS results to determine how the reaction proceeded and the relative percentage of the desired product formation versus reagents and by-products. A crude reaction mixture containing 25% or higher product was subsequently sent to APL for reverse phase purification.

### Purification

Samples were received by the APL team predissolved in 1.5 mL DMSO. Aliquots (8  $\mu$ L) were dispensed to 96 well microtiter plates and dissolved with 0.5 mL MeOH using liquid handling robotics. Those samples were analyzed by LCMS using both high and low pH solvent systems.

Preparative chromatography was performed on each sample using the solvent system selected by the analyst. The high pH solvent system was selected for all compounds except one. Each preparative column measuring 30 X 75 mm was run at 85 mL/min assisted by a pre-column heater set at 50°C. The gradients varied and were selected automatically using software analysis of the analytical data. Each method employed a gradient from 0 to 8 min, followed by a column wash for a total cycle time of 10 min. All run parameters, including custom gradient and UV/MS thresholds, were computed using A-to-Prep software (On-the-Mark Solutions). Preparative chromatography fractions were dried under a heated stream of nitrogen gas. The dried samples were then transferred to a Hamilton liquid handler for dissolution, aliquot apportioning, and transfer. During apportioning, a sample aliquot sufficient to generate 1.5 mL of a 10 mM solution was transferred to a 3.5 mL vial and re-dried under nitrogen. Each sample was then reconstituted with 1.5 mL d6-DMSO. Aliquots were taken for final analytical LCMS purity assessment and NMR analysis. The remainder of the sample was sent for plating in preparation of biological testing.

Analytical chromatography was performed on Agilent LCMS 1100/MSD instruments running Chemstation software vB.04.03. Phenomenex Gemini-NX (high pH) and Luna (low pH) columns (2.1 X 50 mm) were used at a flow rate of 1.0 mL/min with a gradient of 5-100% ACN from 0 to 3 min. The high pH system employed 10 mM ammonium bicarbonate buffer, pH 10; and the low pH system employed 0.1% (v/v) trifluoroacetic acid as the aqueous components of the solvent system.

## NMR

NMR samples were transferred to 4" 5.0 mm dia. Bruker NMR tubes held in a 96 sample SampleJet rack. Each tube is pre-equipped with a barcoded cap with an inlet hole. After sample is added to each tube, small Teflon balls are added to the cap to seal the samples. Data was acquired on a Bruker AS400 NMR.

The  $^1\text{H}$ -CPMG NMR method, utilizes relaxation-edited one dimensional  $^1\text{H}$  NMR spectra [Fesik 1997] that exploit differences in the magnetic relaxation properties of a ligand between its free and protein bound states. To detect ligand binding with this approach, several relaxation-edited  $^1\text{H}$  NMR spectra were acquired with a transverse relaxation filter of 400 ms in duration. First, a relaxation-edited spectrum of the test compound in the absence of ULK1 was obtained. Next, a small amount of a concentrated stock solution of ULK1 was added to the test sample to reach a predetermined protein concentration, and the corresponding relaxation-edited spectrum was recorded. Signals from the test compound were then compared to those in the absence of ULK1, and a significant reduction above a threshold value (an empirical value of 25% was used in this study) in signal intensities indicated binding to the protein. In a final step, a competitor compound, namely a known ligand of ULK1 with high affinity and X-ray structure available, was added to the test sample and the signals of the test compound were again monitored by a relaxation-edited  $^1\text{H}$  NMR spectrum. Recovery of the signals from the test compound above a predetermined threshold level (an empirical value of 50% was used in this study) indicates the test compound and the competitor compound bind to similar sites on the receptor protein.

## Protein Crystallography

BTC was obtained as neat stock (dry powder) and dissolved in DMSO to make a 100mM stock solution. 14 mg/mL ULK1 protein in 50mM Tris pH 8, 150mM NaCl, 10% glycerol, 2.5mM TCEP was pre-incubated at 4°C in a 1:5 molar ratio with BTC diluted from 100mM DMSO stock for 1 hr. The protein-ligand mixture was filtered by centrifugal filtration device to remove any formed precipitate and subsequently set up in sitting drop crystallization trays using a Phoenix liquid handling robot mixing 0.3  $\mu\text{L}$  of protein with 0.3  $\mu\text{L}$  of well solution.

The protein-ligand complex crystallized by vapor diffusion at 8°C with a well solution of 31% PEG 4K, 200mM calcium chloride and 100mM bis tris propane pH 8.5. Crystals were transferred into a drop containing 22% glycerol in well solution for several seconds and then flash frozen in liquid nitrogen.

Diffraction data were collected at LRL-CAT (Lilly Research Laboratories Collaborative Access Team), sector 31ID of the Advanced Photon Source at Argonne National Laboratory, Chicago, Illinois. Crystals stored in liquid nitrogen were mounted on a goniometer equipped with an Oxford Cryosystems cryostream maintained at a temperature of 100 Kelvin. The wavelength used was 0.9793 Å collecting 180 diffraction images at a 1 degree oscillation angle and 0.2 seconds exposure time on a Rayonix 225-

HE CCD detector at a distance of 119 mm. The images were indexed with MOSFLM and further processed with Scala and Truncate from CCP4<sup>36</sup>.

The diffraction data for ULK1 were isomorphous to previously obtained protein structures of ULK1 from the Lilly Biotechnology Center, San Diego, California (not published). The initial structure coordinates were further refined using Refmac5 (CCP4) applying isotropic temperature factors. Model building including placement of BTC was performed with Coot (CCP4) and final structure validation with MolProbity<sup>37</sup> and CCP4 validation tools.

The crystal structure obtained is supplied as SI3 and SI4 to this manuscript in pdb and pdf file formats respectively.

**Supporting Information 3: pdb file containing the crystal structure of the complex of ULK1 and BTC submitted to the public PDB database (<https://www.rcsb.org/>) under the access code 6MNH**

HEADER ULK1 - 3207658 25-NOV-13 F6802  
TITLE CLONE 8253a25SPt1p1 D068926 8253F3R6 SP + S195A/S224A  
AUTHOR J.Hendle, Eli Lilly & Company  
KEYWDS ULK1, GENE ID: 8408, 8253a25SPt1p1,  
KEYWDS 2 8253F3R6 SP + S195A/S224A, 3207658,  
KEYWDS 3 ULK1\_8253a25SPt1p1\_3207658\_T01\_D068926\_P01,  
KEYWDS 4 Crystal ID: 188732  
HETNAM SX1 3207658  
SMILES N(C(=O)C1=CC2=C(C=C1)NN=N2)C(C)C(C)C  
HETNAM CL CHLORIDE ION  
HETNAM DMS DIMETHYL SULFOXIDE  
REMARK 2 RESOLUTION. 1.73 ANGSTROMS.  
REMARK 3  
REMARK 3 REFINEMENT.  
REMARK 3 PROGRAM : REFMAC 5.8.0103  
REMARK 3 AUTHORS : MURSHUDOV,SKUBAK,LEBEDEV,PANNU,  
REMARK 3 STEINER,NICHOLLS,WINN,LONG,VAGIN  
REMARK 3  
REMARK 3 REFINEMENT TARGET : MAXIMUM LIKELIHOOD  
REMARK 3  
REMARK 3 DATA USED IN REFINEMENT.  
REMARK 3 RESOLUTION RANGE HIGH (ANGSTROMS) : 1.73  
REMARK 3 RESOLUTION RANGE LOW (ANGSTROMS) : 29.14  
REMARK 3 DATA CUTOFF (SIGMA(F)) : NONE  
REMARK 3 COMPLETENESS FOR RANGE (%) : 98.55  
REMARK 3 NUMBER OF REFLECTIONS : 26741  
REMARK 3  
REMARK 3 FIT TO DATA USED IN REFINEMENT.  
REMARK 3 CROSS-VALIDATION METHOD : THROUGHOUT  
REMARK 3 FREE R VALUE TEST SET SELECTION : RANDOM  
REMARK 3 R VALUE (WORKING + TEST SET) : 0.19290  
REMARK 3 R VALUE (WORKING SET) : 0.19102  
REMARK 3 FREE R VALUE : 0.22853  
REMARK 3 FREE R VALUE TEST SET SIZE (%) : 5.0  
REMARK 3 FREE R VALUE TEST SET COUNT : 1407  
REMARK 3  
REMARK 3 FIT IN THE HIGHEST RESOLUTION BIN.

REMARK 3 TOTAL NUMBER OF BINS USED : 20  
REMARK 3 BIN RESOLUTION RANGE HIGH : 1.730  
REMARK 3 BIN RESOLUTION RANGE LOW : 1.775  
REMARK 3 REFLECTION IN BIN (WORKING SET): 1953  
REMARK 3 BIN COMPLETENESS (WORKING+TEST) (%): 99.85  
REMARK 3 BIN R VALUE (WORKING SET): 0.237  
REMARK 3 BIN FREE R VALUE SET COUNT : 102  
REMARK 3 BIN FREE R VALUE : 0.271  
REMARK 3  
REMARK 3 NUMBER OF NON-HYDROGEN ATOMS USED IN REFINEMENT.  
REMARK 3 ALL ATOMS : 2400  
REMARK 3  
REMARK 3 B VALUES.  
REMARK 3 FROM WILSON PLOT (A\*\*2): NULL  
REMARK 3 MEAN B VALUE (OVERALL, A\*\*2): 22.069  
REMARK 3 OVERALL ANISOTROPIC B VALUE.  
REMARK 3 B11 (A\*\*2): 0.40  
REMARK 3 B22 (A\*\*2): -0.79  
REMARK 3 B33 (A\*\*2): 0.39  
REMARK 3 B12 (A\*\*2): 0.00  
REMARK 3 B13 (A\*\*2): -0.00  
REMARK 3 B23 (A\*\*2): 0.00  
REMARK 3  
REMARK 3 ESTIMATED OVERALL COORDINATE ERROR.  
REMARK 3 ESU BASED ON R VALUE (A): 0.126  
REMARK 3 ESU BASED ON FREE R VALUE (A): 0.121  
REMARK 3 ESU BASED ON MAXIMUM LIKELIHOOD (A): 0.082  
REMARK 3 ESU FOR B VALUES BASED ON MAXIMUM LIKELIHOOD (A\*\*2): 2.519  
REMARK 3  
REMARK 3 CORRELATION COEFFICIENTS.  
REMARK 3 CORRELATION COEFFICIENT FO-FC : 0.951  
REMARK 3 CORRELATION COEFFICIENT FO-FC FREE : 0.925  
REMARK 3  
REMARK 3 RMS DEVIATIONS FROM IDEAL VALUES COUNT RMS WEIGHT  
REMARK 3 BOND LENGTHS REFINED ATOMS (A): 2214 ; 0.009 ; 0.019  
REMARK 3 BOND ANGLES REFINED ATOMS (DEGREES): 2993 ; 1.287 ; 1.982  
REMARK 3 TORSION ANGLES, PERIOD 1 (DEGREES): 273 ; 5.362 ; 5.000  
REMARK 3 TORSION ANGLES, PERIOD 2 (DEGREES): 99 ; 35.842 ; 23.030  
REMARK 3 TORSION ANGLES, PERIOD 3 (DEGREES): 396 ; 13.752 ; 15.000  
REMARK 3 TORSION ANGLES, PERIOD 4 (DEGREES): 17 ; 18.747 ; 15.000  
REMARK 3 CHIRAL-CENTER RESTRAINTS (A\*\*3): 335 ; 0.082 ; 0.200  
REMARK 3 GENERAL PLANES REFINED ATOMS (A): 1646 ; 0.005 ; 0.021

REMARK 3  
REMARK 3 ISOTROPIC THERMAL FACTOR RESTRAINTS. COUNT RMS WEIGHT  
REMARK 3 MAIN-CHAIN BOND REFINED ATOMS (A\*\*2): 1068 ; 2.721 ; 5.724  
REMARK 3 MAIN-CHAIN ANGLE REFINED ATOMS (A\*\*2): 1331 ; 3.692 ; 8.496  
REMARK 3 SIDE-CHAIN BOND REFINED ATOMS (A\*\*2): 1146 ; 4.375 ; 6.777  
REMARK 3 LONG RANGE B REFINED ATOMS (A\*\*2) : 3528 ; 7.501 ; 28.191  
REMARK 3  
REMARK 3 NCS RESTRAINTS STATISTICS  
REMARK 3 NUMBER OF NCS GROUPS : NULL  
REMARK 3  
REMARK 3 TWIN DETAILS  
REMARK 3 NUMBER OF TWIN DOMAINS : NULL  
REMARK 3  
REMARK 3  
REMARK 3 TLS DETAILS  
REMARK 3 NUMBER OF TLS GROUPS : NULL  
REMARK 3  
REMARK 3  
REMARK 3 BULK SOLVENT MODELLING.  
REMARK 3 METHOD USED : MASK  
REMARK 3 PARAMETERS FOR MASK CALCULATION  
REMARK 3 VDW PROBE RADIUS : 1.20  
REMARK 3 ION PROBE RADIUS : 0.80  
REMARK 3 SHRINKAGE RADIUS : 0.80  
REMARK 3  
REMARK 3 OTHER REFINEMENT REMARKS:  
REMARK 3 HYDROGENS HAVE BEEN USED IF PRESENT IN THE INPUT  
REMARK 3 U VALUES : REFINED INDIVIDUALLY  
REMARK 3  
REMARK 6  
REMARK 6 LIGAND OMIT DENSITY CC, MEAN B-FACTOR, MEAN OCCUPANCY  
REMARK 6 I 1 SX1 0.9374 24.645 1.00  
REMARK 6 K 1 DMS 0.5958 51.470 1.00  
REMARK 6 K 2 CL 0.8570 33.000 1.00  
SEQRES 1 A 287 SER LEU GLY GLY THR GLU THR VAL GLY LYS PHE GLU PHE  
SEQRES 2 A 287 SER ARG LYS ASP LEU ILE GLY HIS GLY ALA PHE ALA VAL  
SEQRES 3 A 287 VAL PHE LYS GLY ARG HIS ARG GLU LYS HIS ASP LEU GLU  
SEQRES 4 A 287 VAL ALA VAL LYS CYS ILE ASN LYS LYS ASN LEU ALA LYS  
SEQRES 5 A 287 SER GLN THR LEU LEU GLY LYS GLU ILE LYS ILE LEU LYS  
SEQRES 6 A 287 GLU LEU LYS HIS GLU ASN ILE VAL ALA LEU TYR ASP PHE  
SEQRES 7 A 287 GLN GLU MET ALA ASN SER VAL TYR LEU VAL MET GLU TYR  
SEQRES 8 A 287 CYS ASN GLY GLY ASP LEU ALA ASP TYR LEU HIS ALA MET

SEQRES 9 A 287 ARG THR LEU SER GLU ASP THR ILE ARG LEU PHE LEU GLN  
 SEQRES 10 A 287 GLN ILE ALA GLY ALA MET ARG LEU LEU HIS SER LYS GLY  
 SEQRES 11 A 287 ILE ILE HIS ARG ASP LEU LYS PRO GLN ASN ILE LEU LEU  
 SEQRES 12 A 287 SER ASN PRO ALA GLY ARG ARG ALA ASN PRO ASN SER ILE  
 SEQRES 13 A 287 ARG VAL LYS ILE ALA ASP PHE GLY PHE ALA ARG TYR LEU  
 SEQRES 14 A 287 GLN SER ASN MET MET ALA ALA THR LEU CYS GLY SER PRO  
 SEQRES 15 A 287 MET TYR MET ALA PRO GLU VAL ILE MET ALA GLN HIS TYR  
 SEQRES 16 A 287 ASP GLY LYS ALA ASP LEU TRP SER ILE GLY THR ILE VAL  
 SEQRES 17 A 287 TYR GLN CYS LEU THR GLY LYS ALA PRO PHE GLN ALA ALA  
 SEQRES 18 A 287 SER PRO GLN ASP LEU ARG LEU PHE TYR GLU LYS ASN LYS  
 SEQRES 19 A 287 THR LEU VAL PRO THR ILE PRO ARG GLU THR SER ALA PRO  
 SEQRES 20 A 287 LEU ARG GLN LEU LEU LEU ALA LEU LEU GLN ARG ASN HIS  
 SEQRES 21 A 287 LYS ASP ARG MET ASP PHE ASP GLU PHE PHE HIS HIS PRO  
 SEQRES 22 A 287 PHE LEU ASP ALA SER PRO SER VAL ARG LYS SER PRO PRO  
 SEQRES 23 A 287 VAL

CRYST1 101.984 44.884 58.022 90.00 90.00 90.00 P 21 21 2

SCALE1 0.009805 0.000000 0.000000 0.00000

SCALE2 -0.000000 0.022280 0.000000 0.00000

SCALE3 0.000000 -0.000000 0.017235 0.00000

|      |    |     |     |   |    |        |        |        |      |       |   |
|------|----|-----|-----|---|----|--------|--------|--------|------|-------|---|
| ATOM | 1  | N   | THR | A | 8  | 1.979  | 2.754  | 44.820 | 1.00 | 50.01 | N |
| ATOM | 2  | CA  | THR | A | 8  | 3.104  | 3.545  | 44.240 | 1.00 | 47.64 | C |
| ATOM | 3  | CB  | THR | A | 8  | 3.277  | 4.900  | 44.968 | 1.00 | 57.61 | C |
| ATOM | 4  | OG1 | THR | A | 8  | 2.017  | 5.585  | 45.009 | 1.00 | 63.36 | O |
| ATOM | 5  | CG2 | THR | A | 8  | 4.302  | 5.790  | 44.261 | 1.00 | 49.65 | C |
| ATOM | 6  | C   | THR | A | 8  | 4.408  | 2.740  | 44.264 | 1.00 | 45.36 | C |
| ATOM | 7  | O   | THR | A | 8  | 4.833  | 2.241  | 45.313 | 1.00 | 42.90 | O |
| ATOM | 8  | N   | GLU | A | 9  | 5.024  | 2.617  | 43.091 | 1.00 | 33.94 | N |
| ATOM | 9  | CA  | GLU | A | 9  | 6.293  | 1.925  | 42.928 | 1.00 | 26.32 | C |
| ATOM | 10 | CB  | GLU | A | 9  | 6.333  | 1.192  | 41.585 | 1.00 | 24.33 | C |
| ATOM | 11 | CG  | GLU | A | 9  | 5.554  | -0.103 | 41.574 | 1.00 | 28.20 | C |
| ATOM | 12 | CD  | GLU | A | 9  | 5.436  | -0.670 | 40.182 | 1.00 | 25.08 | C |
| ATOM | 13 | OE1 | GLU | A | 9  | 6.440  | -1.214 | 39.676 | 1.00 | 27.52 | O |
| ATOM | 14 | OE2 | GLU | A | 9  | 4.336  | -0.560 | 39.613 | 1.00 | 28.81 | O |
| ATOM | 15 | C   | GLU | A | 9  | 7.424  | 2.923  | 42.996 | 1.00 | 26.40 | C |
| ATOM | 16 | O   | GLU | A | 9  | 7.231  | 4.097  | 42.698 | 1.00 | 28.10 | O |
| ATOM | 17 | N   | THR | A | 10 | 8.601  | 2.447  | 43.391 | 1.00 | 26.38 | N |
| ATOM | 18 | CA  | THR | A | 10 | 9.773  | 3.297  | 43.546 | 1.00 | 23.29 | C |
| ATOM | 19 | CB  | THR | A | 10 | 10.146 | 3.514  | 45.041 | 1.00 | 27.20 | C |
| ATOM | 20 | OG1 | THR | A | 10 | 10.411 | 2.253  | 45.660 | 1.00 | 27.51 | O |
| ATOM | 21 | CG2 | THR | A | 10 | 9.016  | 4.208  | 45.813 | 1.00 | 29.78 | C |
| ATOM | 22 | C   | THR | A | 10 | 10.967 | 2.721  | 42.790 | 1.00 | 25.51 | C |
| ATOM | 23 | O   | THR | A | 10 | 11.095 | 1.499  | 42.647 | 1.00 | 29.48 | O |



|      |    |     |       |    |        |        |        |      |       |   |
|------|----|-----|-------|----|--------|--------|--------|------|-------|---|
| ATOM | 24 | N   | VAL A | 11 | 11.805 | 3.617  | 42.277 | 1.00 | 21.89 | N |
| ATOM | 25 | CA  | VAL A | 11 | 13.118 | 3.298  | 41.703 | 1.00 | 25.79 | C |
| ATOM | 26 | CB  | VAL A | 11 | 13.148 | 3.369  | 40.147 | 1.00 | 29.38 | C |
| ATOM | 27 | CG1 | VAL A | 11 | 14.542 | 3.038  | 39.617 | 1.00 | 25.36 | C |
| ATOM | 28 | CG2 | VAL A | 11 | 12.118 | 2.440  | 39.524 | 1.00 | 30.93 | C |
| ATOM | 29 | C   | VAL A | 11 | 14.097 | 4.318  | 42.283 | 1.00 | 23.06 | C |
| ATOM | 30 | O   | VAL A | 11 | 14.141 | 5.473  | 41.848 | 1.00 | 24.07 | O |
| ATOM | 31 | N   | GLY A | 12 | 14.879 | 3.888  | 43.270 | 1.00 | 25.03 | N |
| ATOM | 32 | CA  | GLY A | 12 | 15.744 | 4.802  | 44.017 | 1.00 | 20.85 | C |
| ATOM | 33 | C   | GLY A | 12 | 14.932 | 5.938  | 44.616 | 1.00 | 17.95 | C |
| ATOM | 34 | O   | GLY A | 12 | 13.900 | 5.701  | 45.269 | 1.00 | 22.14 | O |
| ATOM | 35 | N   | LYS A | 13 | 15.379 | 7.167  | 44.342 | 1.00 | 19.92 | N |
| ATOM | 36 | CA  | LYS A | 13 | 14.743 | 8.406  | 44.824 | 1.00 | 19.95 | C |
| ATOM | 37 | CB  | LYS A | 13 | 15.759 | 9.562  | 44.869 | 1.00 | 26.52 | C |
| ATOM | 38 | CG  | LYS A | 13 | 17.038 | 9.313  | 45.663 | 1.00 | 32.87 | C |
| ATOM | 39 | CD  | LYS A | 13 | 16.904 | 9.716  | 47.121 | 1.00 | 38.95 | C |
| ATOM | 40 | CE  | LYS A | 13 | 18.243 | 9.629  | 47.838 | 1.00 | 29.68 | C |
| ATOM | 41 | NZ  | LYS A | 13 | 19.061 | 10.862 | 47.663 | 1.00 | 32.52 | N |
| ATOM | 42 | C   | LYS A | 13 | 13.530 | 8.842  | 43.989 | 1.00 | 23.94 | C |
| ATOM | 43 | O   | LYS A | 13 | 12.981 | 9.921  | 44.223 | 1.00 | 22.26 | O |
| ATOM | 44 | N   | PHE A | 14 | 13.104 | 8.001  | 43.042 | 1.00 | 19.46 | N |
| ATOM | 45 | CA  | PHE A | 14 | 11.960 | 8.305  | 42.166 | 1.00 | 18.30 | C |
| ATOM | 46 | CB  | PHE A | 14 | 12.404 | 8.273  | 40.691 | 1.00 | 16.46 | C |
| ATOM | 47 | CG  | PHE A | 14 | 13.566 | 9.178  | 40.401 | 1.00 | 15.91 | C |
| ATOM | 48 | CD1 | PHE A | 14 | 13.349 | 10.508 | 40.049 | 1.00 | 17.00 | C |
| ATOM | 49 | CE1 | PHE A | 14 | 14.423 | 11.355 | 39.796 | 1.00 | 17.24 | C |
| ATOM | 50 | CZ  | PHE A | 14 | 15.729 | 10.885 | 39.921 | 1.00 | 17.22 | C |
| ATOM | 51 | CE2 | PHE A | 14 | 15.958 | 9.565  | 40.288 | 1.00 | 17.85 | C |
| ATOM | 52 | CD2 | PHE A | 14 | 14.878 | 8.718  | 40.531 | 1.00 | 17.20 | C |
| ATOM | 53 | C   | PHE A | 14 | 10.783 | 7.363  | 42.402 | 1.00 | 20.17 | C |
| ATOM | 54 | O   | PHE A | 14 | 10.962 | 6.229  | 42.847 | 1.00 | 24.10 | O |
| ATOM | 55 | N   | GLU A | 15 | 9.578  | 7.839  | 42.105 | 1.00 | 18.85 | N |
| ATOM | 56 | CA  | GLU A | 15 | 8.359  | 7.053  | 42.290 | 1.00 | 21.17 | C |
| ATOM | 57 | CB  | GLU A | 15 | 7.659  | 7.394  | 43.616 | 1.00 | 23.95 | C |
| ATOM | 58 | CG  | GLU A | 15 | 6.963  | 8.756  | 43.662 | 1.00 | 26.96 | C |
| ATOM | 59 | CD  | GLU A | 15 | 6.402  | 9.127  | 45.032 | 1.00 | 40.15 | C |
| ATOM | 60 | OE1 | GLU A | 15 | 6.387  | 8.281  | 45.954 | 1.00 | 37.10 | O |
| ATOM | 61 | OE2 | GLU A | 15 | 5.967  | 10.285 | 45.183 | 1.00 | 42.37 | O |
| ATOM | 62 | C   | GLU A | 15 | 7.405  | 7.240  | 41.113 | 1.00 | 21.08 | C |
| ATOM | 63 | O   | GLU A | 15 | 7.468  | 8.252  | 40.423 | 1.00 | 21.34 | O |
| ATOM | 64 | N   | PHE A | 16 | 6.533  | 6.260  | 40.896 | 1.00 | 20.53 | N |
| ATOM | 65 | CA  | PHE A | 16 | 5.534  | 6.330  | 39.818 | 1.00 | 23.54 | C |

|      |     |     |     |   |    |        |        |        |      |       |   |
|------|-----|-----|-----|---|----|--------|--------|--------|------|-------|---|
| ATOM | 66  | CB  | PHE | A | 16 | 6.158  | 5.968  | 38.449 | 1.00 | 21.56 | C |
| ATOM | 67  | CG  | PHE | A | 16 | 6.645  | 4.542  | 38.343 | 1.00 | 21.28 | C |
| ATOM | 68  | CD1 | PHE | A | 16 | 5.861  | 3.565  | 37.710 | 1.00 | 18.96 | C |
| ATOM | 69  | CE1 | PHE | A | 16 | 6.306  | 2.247  | 37.605 | 1.00 | 16.83 | C |
| ATOM | 70  | CZ  | PHE | A | 16 | 7.554  | 1.896  | 38.118 | 1.00 | 21.90 | C |
| ATOM | 71  | CE2 | PHE | A | 16 | 8.350  | 2.857  | 38.740 | 1.00 | 20.34 | C |
| ATOM | 72  | CD2 | PHE | A | 16 | 7.899  | 4.173  | 38.846 | 1.00 | 19.58 | C |
| ATOM | 73  | C   | PHE | A | 16 | 4.328  | 5.452  | 40.105 | 1.00 | 21.82 | C |
| ATOM | 74  | O   | PHE | A | 16 | 4.440  | 4.442  | 40.807 | 1.00 | 24.11 | O |
| ATOM | 75  | N   | SER | A | 17 | 3.180  | 5.861  | 39.565 | 1.00 | 23.81 | N |
| ATOM | 76  | CA  | SER | A | 17 | 1.984  | 5.033  | 39.519 | 1.00 | 24.29 | C |
| ATOM | 77  | CB  | SER | A | 17 | 0.759  | 5.816  | 39.982 | 1.00 | 24.61 | C |
| ATOM | 78  | OG  | SER | A | 17 | -0.439 | 5.098  | 39.714 | 1.00 | 28.43 | O |
| ATOM | 79  | C   | SER | A | 17 | 1.779  | 4.562  | 38.080 | 1.00 | 26.16 | C |
| ATOM | 80  | O   | SER | A | 17 | 1.887  | 5.355  | 37.133 | 1.00 | 24.28 | O |
| ATOM | 81  | N   | ARG | A | 18 | 1.475  | 3.277  | 37.932 | 1.00 | 23.31 | N |
| ATOM | 82  | CA  | ARG | A | 18 | 1.208  | 2.679  | 36.617 | 1.00 | 24.56 | C |
| ATOM | 83  | CB  | ARG | A | 18 | 1.350  | 1.145  | 36.654 | 1.00 | 24.32 | C |
| ATOM | 84  | CG  | ARG | A | 18 | 2.790  | 0.688  | 36.846 | 1.00 | 23.72 | C |
| ATOM | 85  | CD  | ARG | A | 18 | 3.007  | -0.798 | 36.569 | 1.00 | 22.06 | C |
| ATOM | 86  | NE  | ARG | A | 18 | 4.346  | -1.187 | 37.015 | 1.00 | 25.95 | N |
| ATOM | 87  | CZ  | ARG | A | 18 | 5.303  | -1.724 | 36.258 | 1.00 | 23.42 | C |
| ATOM | 88  | NH1 | ARG | A | 18 | 5.094  | -2.005 | 34.972 | 1.00 | 22.93 | N |
| ATOM | 89  | NH2 | ARG | A | 18 | 6.474  | -2.004 | 36.810 | 1.00 | 21.44 | N |
| ATOM | 90  | C   | ARG | A | 18 | -0.127 | 3.151  | 36.010 | 1.00 | 26.97 | C |
| ATOM | 91  | O   | ARG | A | 18 | -0.419 | 2.866  | 34.848 | 1.00 | 23.14 | O |
| ATOM | 92  | N   | LYS | A | 19 | -0.917 | 3.893  | 36.794 | 1.00 | 26.12 | N |
| ATOM | 93  | CA  | LYS | A | 19 | -2.068 | 4.637  | 36.268 | 1.00 | 26.57 | C |
| ATOM | 94  | CB  | LYS | A | 19 | -2.838 | 5.342  | 37.389 | 1.00 | 30.95 | C |
| ATOM | 95  | CG  | LYS | A | 19 | -3.642 | 4.421  | 38.288 | 1.00 | 29.67 | C |
| ATOM | 96  | CD  | LYS | A | 19 | -4.628 | 5.230  | 39.116 | 1.00 | 42.35 | C |
| ATOM | 97  | CE  | LYS | A | 19 | -5.309 | 4.372  | 40.168 | 1.00 | 49.28 | C |
| ATOM | 98  | NZ  | LYS | A | 19 | -6.391 | 5.123  | 40.864 | 1.00 | 43.31 | N |
| ATOM | 99  | C   | LYS | A | 19 | -1.622 | 5.676  | 35.240 | 1.00 | 24.30 | C |
| ATOM | 100 | O   | LYS | A | 19 | -2.334 | 5.947  | 34.285 | 1.00 | 24.57 | O |
| ATOM | 101 | N   | ASP | A | 20 | -0.423 | 6.225  | 35.430 | 1.00 | 22.27 | N |
| ATOM | 102 | CA  | ASP | A | 20 | 0.098  | 7.293  | 34.575 | 1.00 | 22.14 | C |
| ATOM | 103 | CB  | ASP | A | 20 | 0.856  | 8.318  | 35.429 | 1.00 | 22.19 | C |
| ATOM | 104 | CG  | ASP | A | 20 | -0.029 | 8.962  | 36.483 | 1.00 | 29.94 | C |
| ATOM | 105 | OD1 | ASP | A | 20 | -1.211 | 9.230  | 36.197 | 1.00 | 32.53 | O |
| ATOM | 106 | OD2 | ASP | A | 20 | 0.456  | 9.191  | 37.606 | 1.00 | 30.98 | O |
| ATOM | 107 | C   | ASP | A | 20 | 0.950  | 6.762  | 33.413 | 1.00 | 20.67 | C |

|      |     |     |     |   |    |        |        |        |      |       |   |
|------|-----|-----|-----|---|----|--------|--------|--------|------|-------|---|
| ATOM | 108 | O   | ASP | A | 20 | 2.103  | 7.133  | 33.249 | 1.00 | 21.66 | O |
| ATOM | 109 | N   | LEU | A | 21 | 0.334  | 5.898  | 32.611 | 1.00 | 22.72 | N |
| ATOM | 110 | CA  | LEU | A | 21 | 0.950  | 5.287  | 31.435 | 1.00 | 26.03 | C |
| ATOM | 111 | CB  | LEU | A | 21 | 0.083  | 4.092  | 31.010 | 1.00 | 24.74 | C |
| ATOM | 112 | CG  | LEU | A | 21 | 0.318  | 3.259  | 29.752 | 1.00 | 26.31 | C |
| ATOM | 113 | CD1 | LEU | A | 21 | 1.675  | 2.599  | 29.785 | 1.00 | 23.19 | C |
| ATOM | 114 | CD2 | LEU | A | 21 | -0.772 | 2.202  | 29.627 | 1.00 | 26.69 | C |
| ATOM | 115 | C   | LEU | A | 21 | 1.110  | 6.307  | 30.298 | 1.00 | 23.76 | C |
| ATOM | 116 | O   | LEU | A | 21 | 0.120  | 6.885  | 29.838 | 1.00 | 25.99 | O |
| ATOM | 117 | N   | ILE | A | 22 | 2.354  | 6.532  | 29.867 | 1.00 | 18.48 | N |
| ATOM | 118 | CA  | ILE | A | 22 | 2.672  | 7.552  | 28.833 | 1.00 | 19.64 | C |
| ATOM | 119 | CB  | ILE | A | 22 | 3.463  | 8.766  | 29.409 | 1.00 | 22.95 | C |
| ATOM | 120 | CG1 | ILE | A | 22 | 4.846  | 8.344  | 29.952 | 1.00 | 21.74 | C |
| ATOM | 121 | CD1 | ILE | A | 22 | 5.799  | 9.488  | 30.265 | 1.00 | 18.06 | C |
| ATOM | 122 | CG2 | ILE | A | 22 | 2.617  | 9.499  | 30.461 | 1.00 | 22.76 | C |
| ATOM | 123 | C   | ILE | A | 22 | 3.354  | 7.017  | 27.553 | 1.00 | 19.26 | C |
| ATOM | 124 | O   | ILE | A | 22 | 3.500  | 7.748  | 26.569 | 1.00 | 20.54 | O |
| ATOM | 125 | N   | GLY | A | 23 | 3.782  | 5.759  | 27.575 | 1.00 | 19.66 | N |
| ATOM | 126 | CA  | GLY | A | 23 | 4.410  | 5.127  | 26.403 | 1.00 | 18.02 | C |
| ATOM | 127 | C   | GLY | A | 23 | 4.344  | 3.625  | 26.486 | 1.00 | 20.10 | C |
| ATOM | 128 | O   | GLY | A | 23 | 4.429  | 3.047  | 27.569 | 1.00 | 19.02 | O |
| ATOM | 129 | N   | HIS | A | 24 | 4.199  | 2.977  | 25.332 | 1.00 | 16.84 | N |
| ATOM | 130 | CA  | HIS | A | 24 | 4.034  | 1.538  | 25.306 | 1.00 | 15.32 | C |
| ATOM | 131 | CB  | HIS | A | 24 | 2.567  | 1.173  | 25.602 | 1.00 | 14.89 | C |
| ATOM | 132 | CG  | HIS | A | 24 | 2.321  | -0.285 | 25.823 | 1.00 | 14.65 | C |
| ATOM | 133 | ND1 | HIS | A | 24 | 1.048  | -0.808 | 25.911 | 1.00 | 19.50 | N |
| ATOM | 134 | CE1 | HIS | A | 24 | 1.123  | -2.113 | 26.094 | 1.00 | 20.53 | C |
| ATOM | 135 | NE2 | HIS | A | 24 | 2.399  | -2.456 | 26.136 | 1.00 | 22.47 | N |
| ATOM | 136 | CD2 | HIS | A | 24 | 3.169  | -1.331 | 25.963 | 1.00 | 15.53 | C |
| ATOM | 137 | C   | HIS | A | 24 | 4.499  | 1.027  | 23.957 | 1.00 | 17.47 | C |
| ATOM | 138 | O   | HIS | A | 24 | 3.967  | 1.405  | 22.918 | 1.00 | 16.30 | O |
| ATOM | 139 | N   | GLY | A | 25 | 5.549  | 0.222  | 23.992 | 1.00 | 15.13 | N |
| ATOM | 140 | CA  | GLY | A | 25 | 6.087  | -0.401 | 22.792 | 1.00 | 16.82 | C |
| ATOM | 141 | C   | GLY | A | 25 | 6.182  | -1.880 | 23.072 | 1.00 | 18.77 | C |
| ATOM | 142 | O   | GLY | A | 25 | 5.860  | -2.327 | 24.188 | 1.00 | 21.81 | O |
| ATOM | 143 | N   | ALA | A | 26 | 6.633  | -2.642 | 22.073 | 1.00 | 18.11 | N |
| ATOM | 144 | CA  | ALA | A | 26 | 6.828  | -4.082 | 22.227 | 1.00 | 18.47 | C |
| ATOM | 145 | CB  | ALA | A | 26 | 7.277  | -4.693 | 20.905 | 1.00 | 20.29 | C |
| ATOM | 146 | C   | ALA | A | 26 | 7.844  | -4.399 | 23.324 | 1.00 | 18.11 | C |
| ATOM | 147 | O   | ALA | A | 26 | 7.750  | -5.446 | 23.981 | 1.00 | 18.99 | O |
| ATOM | 148 | N   | PHE | A | 27 | 8.805  | -3.492 | 23.528 | 1.00 | 16.52 | N |
| ATOM | 149 | CA  | PHE | A | 27 | 9.937  | -3.768 | 24.423 | 1.00 | 18.04 | C |

|      |     |     |     |   |    |        |        |        |      |       |   |
|------|-----|-----|-----|---|----|--------|--------|--------|------|-------|---|
| ATOM | 150 | CB  | PHE | A | 27 | 11.237 | -3.860 | 23.622 | 1.00 | 18.32 | C |
| ATOM | 151 | CG  | PHE | A | 27 | 11.118 | -4.748 | 22.408 | 1.00 | 20.51 | C |
| ATOM | 152 | CD1 | PHE | A | 27 | 10.876 | -6.119 | 22.553 | 1.00 | 22.49 | C |
| ATOM | 153 | CE1 | PHE | A | 27 | 10.731 | -6.941 | 21.436 | 1.00 | 23.80 | C |
| ATOM | 154 | CZ  | PHE | A | 27 | 10.825 | -6.393 | 20.161 | 1.00 | 19.69 | C |
| ATOM | 155 | CE2 | PHE | A | 27 | 11.059 | -5.032 | 20.003 | 1.00 | 20.59 | C |
| ATOM | 156 | CD2 | PHE | A | 27 | 11.191 | -4.210 | 21.122 | 1.00 | 22.25 | C |
| ATOM | 157 | C   | PHE | A | 27 | 10.089 | -2.860 | 25.644 | 1.00 | 18.51 | C |
| ATOM | 158 | O   | PHE | A | 27 | 11.087 | -2.946 | 26.366 | 1.00 | 16.97 | O |
| ATOM | 159 | N   | ALA | A | 28 | 9.093  | -2.008 | 25.879 | 1.00 | 17.99 | N |
| ATOM | 160 | CA  | ALA | A | 28 | 9.095  | -1.140 | 27.055 | 1.00 | 17.97 | C |
| ATOM | 161 | CB  | ALA | A | 28 | 10.106 | -0.007 | 26.899 | 1.00 | 16.20 | C |
| ATOM | 162 | C   | ALA | A | 28 | 7.723  | -0.573 | 27.351 | 1.00 | 18.95 | C |
| ATOM | 163 | O   | ALA | A | 28 | 6.909  | -0.363 | 26.455 | 1.00 | 18.71 | O |
| ATOM | 164 | N   | VAL | A | 29 | 7.468  | -0.344 | 28.632 | 1.00 | 17.53 | N |
| ATOM | 165 | CA  | VAL | A | 29 | 6.292  | 0.403  | 29.062 | 1.00 | 17.91 | C |
| ATOM | 166 | CB  | VAL | A | 29 | 5.310  | -0.465 | 29.900 | 1.00 | 21.76 | C |
| ATOM | 167 | CG1 | VAL | A | 29 | 3.967  | 0.212  | 30.007 | 1.00 | 26.51 | C |
| ATOM | 168 | CG2 | VAL | A | 29 | 5.073  | -1.827 | 29.263 | 1.00 | 23.30 | C |
| ATOM | 169 | C   | VAL | A | 29 | 6.811  | 1.613  | 29.849 | 1.00 | 18.34 | C |
| ATOM | 170 | O   | VAL | A | 29 | 7.735  | 1.476  | 30.649 | 1.00 | 17.39 | O |
| ATOM | 171 | N   | VAL | A | 30 | 6.247  | 2.794  | 29.590 | 1.00 | 16.18 | N |
| ATOM | 172 | CA  | VAL | A | 30 | 6.758  | 4.046  | 30.168 | 1.00 | 15.86 | C |
| ATOM | 173 | CB  | VAL | A | 30 | 7.336  | 5.023  | 29.103 | 1.00 | 15.79 | C |
| ATOM | 174 | CG1 | VAL | A | 30 | 8.149  | 6.131  | 29.764 | 1.00 | 15.60 | C |
| ATOM | 175 | CG2 | VAL | A | 30 | 8.219  | 4.297  | 28.099 | 1.00 | 14.66 | C |
| ATOM | 176 | C   | VAL | A | 30 | 5.685  | 4.760  | 30.979 | 1.00 | 17.23 | C |
| ATOM | 177 | O   | VAL | A | 30 | 4.564  | 4.965  | 30.507 | 1.00 | 17.79 | O |
| ATOM | 178 | N   | PHE | A | 31 | 6.063  | 5.174  | 32.190 | 1.00 | 15.93 | N |
| ATOM | 179 | CA  | PHE | A | 31 | 5.136  | 5.842  | 33.104 | 1.00 | 19.07 | C |
| ATOM | 180 | CB  | PHE | A | 31 | 4.899  | 4.970  | 34.340 | 1.00 | 18.99 | C |
| ATOM | 181 | CG  | PHE | A | 31 | 4.451  | 3.575  | 34.017 | 1.00 | 17.74 | C |
| ATOM | 182 | CD1 | PHE | A | 31 | 5.363  | 2.511  | 34.046 | 1.00 | 18.65 | C |
| ATOM | 183 | CE1 | PHE | A | 31 | 4.952  | 1.221  | 33.738 | 1.00 | 23.33 | C |
| ATOM | 184 | CZ  | PHE | A | 31 | 3.623  | 0.981  | 33.397 | 1.00 | 22.00 | C |
| ATOM | 185 | CE2 | PHE | A | 31 | 2.709  | 2.029  | 33.351 | 1.00 | 21.42 | C |
| ATOM | 186 | CD2 | PHE | A | 31 | 3.122  | 3.318  | 33.667 | 1.00 | 20.50 | C |
| ATOM | 187 | C   | PHE | A | 31 | 5.646  | 7.209  | 33.529 | 1.00 | 18.19 | C |
| ATOM | 188 | O   | PHE | A | 31 | 6.850  | 7.397  | 33.678 | 1.00 | 21.39 | O |
| ATOM | 189 | N   | LYS | A | 32 | 4.725  | 8.157  | 33.723 | 1.00 | 18.88 | N |
| ATOM | 190 | CA  | LYS | A | 32 | 5.090  | 9.439  | 34.319 | 1.00 | 16.66 | C |
| ATOM | 191 | CB  | LYS | A | 32 | 3.974  | 10.466 | 34.169 | 1.00 | 18.71 | C |

|      |     |     |     |   |    |        |        |        |      |       |   |
|------|-----|-----|-----|---|----|--------|--------|--------|------|-------|---|
| ATOM | 192 | CG  | LYS | A | 32 | 4.421  | 11.908 | 34.386 | 1.00 | 19.81 | C |
| ATOM | 193 | CD  | LYS | A | 32 | 3.234  | 12.842 | 34.195 | 1.00 | 24.56 | C |
| ATOM | 194 | CE  | LYS | A | 32 | 3.509  | 14.221 | 34.756 | 1.00 | 36.51 | C |
| ATOM | 195 | NZ  | LYS | A | 32 | 2.326  | 15.112 | 34.606 | 1.00 | 40.87 | N |
| ATOM | 196 | C   | LYS | A | 32 | 5.354  | 9.185  | 35.796 | 1.00 | 18.57 | C |
| ATOM | 197 | O   | LYS | A | 32 | 4.653  | 8.392  | 36.424 | 1.00 | 18.89 | O |
| ATOM | 198 | N   | GLY | A | 33 | 6.374  | 9.851  | 36.323 | 1.00 | 20.04 | N |
| ATOM | 199 | CA  | GLY | A | 33 | 6.727  | 9.729  | 37.730 | 1.00 | 23.92 | C |
| ATOM | 200 | C   | GLY | A | 33 | 7.258  | 11.028 | 38.284 | 1.00 | 26.37 | C |
| ATOM | 201 | O   | GLY | A | 33 | 7.260  | 12.054 | 37.599 | 1.00 | 23.41 | O |
| ATOM | 202 | N   | ARG | A | 34 | 7.719  | 10.979 | 39.531 | 1.00 | 23.85 | N |
| ATOM | 203 | CA  | ARG | A | 34 | 8.221  | 12.172 | 40.215 | 1.00 | 24.53 | C |
| ATOM | 204 | CB  | ARG | A | 34 | 7.083  | 12.915 | 40.948 | 1.00 | 24.81 | C |
| ATOM | 205 | CG  | ARG | A | 34 | 6.385  | 12.130 | 42.052 | 1.00 | 28.35 | C |
| ATOM | 206 | CD  | ARG | A | 34 | 5.171  | 12.858 | 42.623 | 1.00 | 37.29 | C |
| ATOM | 207 | NE  | ARG | A | 34 | 4.446  | 12.007 | 43.574 | 1.00 | 49.27 | N |
| ATOM | 208 | CZ  | ARG | A | 34 | 3.228  | 12.239 | 44.070 | 1.00 | 52.06 | C |
| ATOM | 209 | NH1 | ARG | A | 34 | 2.535  | 13.325 | 43.743 | 1.00 | 48.69 | N |
| ATOM | 210 | NH2 | ARG | A | 34 | 2.700  | 11.373 | 44.925 | 1.00 | 61.87 | N |
| ATOM | 211 | C   | ARG | A | 34 | 9.368  | 11.822 | 41.156 | 1.00 | 24.23 | C |
| ATOM | 212 | O   | ARG | A | 34 | 9.509  | 10.663 | 41.561 | 1.00 | 21.13 | O |
| ATOM | 213 | N   | HIS | A | 35 | 10.210 | 12.815 | 41.458 | 1.00 | 23.07 | N |
| ATOM | 214 | CA  | HIS | A | 35 | 11.215 | 12.690 | 42.513 | 1.00 | 20.32 | C |
| ATOM | 215 | CB  | HIS | A | 35 | 12.191 | 13.875 | 42.485 | 1.00 | 20.85 | C |
| ATOM | 216 | CG  | HIS | A | 35 | 13.463 | 13.623 | 43.229 | 1.00 | 23.90 | C |
| ATOM | 217 | ND1 | HIS | A | 35 | 13.528 | 13.612 | 44.607 | 1.00 | 22.67 | N |
| ATOM | 218 | CE1 | HIS | A | 35 | 14.769 | 13.362 | 44.985 | 1.00 | 21.21 | C |
| ATOM | 219 | NE2 | HIS | A | 35 | 15.510 | 13.203 | 43.903 | 1.00 | 24.22 | N |
| ATOM | 220 | CD2 | HIS | A | 35 | 14.718 | 13.363 | 42.792 | 1.00 | 23.48 | C |
| ATOM | 221 | C   | HIS | A | 35 | 10.502 | 12.607 | 43.867 | 1.00 | 20.71 | C |
| ATOM | 222 | O   | HIS | A | 35 | 9.567  | 13.371 | 44.135 | 1.00 | 25.30 | O |
| ATOM | 223 | N   | ARG | A | 36 | 10.945 | 11.678 | 44.715 | 1.00 | 21.26 | N |
| ATOM | 224 | CA  | ARG | A | 36 | 10.241 | 11.392 | 45.975 | 1.00 | 21.31 | C |
| ATOM | 225 | CB  | ARG | A | 36 | 10.668 | 10.042 | 46.549 | 1.00 | 20.45 | C |
| ATOM | 226 | CG  | ARG | A | 36 | 10.234 | 8.858  | 45.704 | 1.00 | 21.04 | C |
| ATOM | 227 | CD  | ARG | A | 36 | 11.017 | 7.612  | 46.088 | 1.00 | 22.81 | C |
| ATOM | 228 | NE  | ARG | A | 36 | 10.517 | 7.022  | 47.331 | 1.00 | 18.22 | N |
| ATOM | 229 | CZ  | ARG | A | 36 | 11.079 | 5.992  | 47.951 | 1.00 | 16.74 | C |
| ATOM | 230 | NH1 | ARG | A | 36 | 12.170 | 5.421  | 47.460 | 1.00 | 17.56 | N |
| ATOM | 231 | NH2 | ARG | A | 36 | 10.535 | 5.528  | 49.068 | 1.00 | 20.17 | N |
| ATOM | 232 | C   | ARG | A | 36 | 10.422 | 12.489 | 47.025 | 1.00 | 19.45 | C |
| ATOM | 233 | O   | ARG | A | 36 | 9.587  | 12.640 | 47.915 | 1.00 | 19.43 | O |

|      |     |     |     |   |    |        |        |        |      |       |   |
|------|-----|-----|-----|---|----|--------|--------|--------|------|-------|---|
| ATOM | 234 | N   | GLU | A | 37 | 11.488 | 13.269 | 46.878 | 1.00 | 21.15 | N |
| ATOM | 235 | CA  | GLU | A | 37 | 11.801 | 14.362 | 47.805 | 1.00 | 22.42 | C |
| ATOM | 236 | CB  | GLU | A | 37 | 13.299 | 14.423 | 48.081 | 1.00 | 17.62 | C |
| ATOM | 237 | CG  | GLU | A | 37 | 13.928 | 13.093 | 48.461 | 1.00 | 18.89 | C |
| ATOM | 238 | CD  | GLU | A | 37 | 15.415 | 13.200 | 48.696 | 1.00 | 20.17 | C |
| ATOM | 239 | OE1 | GLU | A | 37 | 16.079 | 14.072 | 48.095 | 1.00 | 24.57 | O |
| ATOM | 240 | OE2 | GLU | A | 37 | 15.931 | 12.414 | 49.498 | 1.00 | 22.22 | O |
| ATOM | 241 | C   | GLU | A | 37 | 11.330 | 15.707 | 47.256 | 1.00 | 28.27 | C |
| ATOM | 242 | O   | GLU | A | 37 | 10.922 | 16.584 | 48.024 | 1.00 | 20.79 | O |
| ATOM | 243 | N   | LYS | A | 38 | 11.415 | 15.856 | 45.930 | 1.00 | 29.44 | N |
| ATOM | 244 | CA  | LYS | A | 38 | 11.042 | 17.084 | 45.218 | 1.00 | 32.76 | C |
| ATOM | 245 | CB  | LYS | A | 38 | 12.245 | 17.654 | 44.446 | 1.00 | 40.02 | C |
| ATOM | 246 | CG  | LYS | A | 38 | 13.528 | 17.837 | 45.250 | 1.00 | 44.55 | C |
| ATOM | 247 | CD  | LYS | A | 38 | 14.755 | 17.663 | 44.365 | 1.00 | 46.17 | C |
| ATOM | 248 | CE  | LYS | A | 38 | 16.033 | 17.635 | 45.189 | 1.00 | 56.91 | C |
| ATOM | 249 | NZ  | LYS | A | 38 | 17.177 | 17.023 | 44.453 | 1.00 | 51.56 | N |
| ATOM | 250 | C   | LYS | A | 38 | 9.906  | 16.727 | 44.260 | 1.00 | 32.80 | C |
| ATOM | 251 | O   | LYS | A | 38 | 10.143 | 16.408 | 43.091 | 1.00 | 34.27 | O |
| ATOM | 252 | N   | HIS | A | 39 | 8.677  | 16.779 | 44.773 | 1.00 | 32.92 | N |
| ATOM | 253 | CA  | HIS | A | 39 | 7.483  | 16.281 | 44.077 | 1.00 | 40.60 | C |
| ATOM | 254 | CB  | HIS | A | 39 | 6.285  | 16.254 | 45.030 | 1.00 | 46.33 | C |
| ATOM | 255 | CG  | HIS | A | 39 | 6.152  | 14.973 | 45.793 | 1.00 | 51.19 | C |
| ATOM | 256 | ND1 | HIS | A | 39 | 4.973  | 14.262 | 45.851 | 1.00 | 53.07 | N |
| ATOM | 257 | CE1 | HIS | A | 39 | 5.149  | 13.179 | 46.588 | 1.00 | 51.93 | C |
| ATOM | 258 | NE2 | HIS | A | 39 | 6.403  | 13.158 | 47.002 | 1.00 | 64.57 | N |
| ATOM | 259 | CD2 | HIS | A | 39 | 7.052  | 14.268 | 46.520 | 1.00 | 53.28 | C |
| ATOM | 260 | C   | HIS | A | 39 | 7.115  | 16.987 | 42.768 | 1.00 | 41.55 | C |
| ATOM | 261 | O   | HIS | A | 39 | 6.371  | 16.430 | 41.951 | 1.00 | 41.57 | O |
| ATOM | 262 | N   | ASP | A | 40 | 7.647  | 18.193 | 42.576 | 1.00 | 38.83 | N |
| ATOM | 263 | CA  | ASP | A | 40 | 7.425  | 18.972 | 41.355 | 1.00 | 39.21 | C |
| ATOM | 264 | CB  | ASP | A | 40 | 7.402  | 20.472 | 41.672 | 1.00 | 36.34 | C |
| ATOM | 265 | CG  | ASP | A | 40 | 6.164  | 20.885 | 42.472 | 1.00 | 43.88 | C |
| ATOM | 266 | OD1 | ASP | A | 40 | 5.090  | 20.258 | 42.310 | 1.00 | 46.60 | O |
| ATOM | 267 | OD2 | ASP | A | 40 | 6.263  | 21.845 | 43.264 | 1.00 | 57.79 | O |
| ATOM | 268 | C   | ASP | A | 40 | 8.414  | 18.645 | 40.230 | 1.00 | 35.95 | C |
| ATOM | 269 | O   | ASP | A | 40 | 8.263  | 19.137 | 39.109 | 1.00 | 33.75 | O |
| ATOM | 270 | N   | LEU | A | 41 | 9.418  | 17.822 | 40.531 | 1.00 | 31.31 | N |
| ATOM | 271 | CA  | LEU | A | 41 | 10.330 | 17.302 | 39.511 | 1.00 | 32.08 | C |
| ATOM | 272 | CB  | LEU | A | 41 | 11.739 | 17.041 | 40.079 | 1.00 | 34.31 | C |
| ATOM | 273 | CG  | LEU | A | 41 | 12.810 | 16.240 | 39.302 | 1.00 | 46.77 | C |
| ATOM | 274 | CD1 | LEU | A | 41 | 13.091 | 16.758 | 37.891 | 1.00 | 47.55 | C |
| ATOM | 275 | CD2 | LEU | A | 41 | 14.102 | 16.180 | 40.106 | 1.00 | 49.78 | C |

|      |     |     |     |   |    |        |        |        |      |       |   |
|------|-----|-----|-----|---|----|--------|--------|--------|------|-------|---|
| ATOM | 276 | C   | LEU | A | 41 | 9.722  | 16.059 | 38.858 | 1.00 | 35.04 | C |
| ATOM | 277 | O   | LEU | A | 41 | 9.652  | 14.985 | 39.469 | 1.00 | 27.07 | O |
| ATOM | 278 | N   | GLU | A | 42 | 9.266  | 16.229 | 37.616 | 1.00 | 27.11 | N |
| ATOM | 279 | CA  | GLU | A | 42 | 8.649  | 15.155 | 36.846 | 1.00 | 29.19 | C |
| ATOM | 280 | CB  | GLU | A | 42 | 7.672  | 15.732 | 35.815 | 1.00 | 29.52 | C |
| ATOM | 281 | CG  | GLU | A | 42 | 6.449  | 16.416 | 36.419 | 1.00 | 31.58 | C |
| ATOM | 282 | CD  | GLU | A | 42 | 5.702  | 17.276 | 35.413 | 1.00 | 41.91 | C |
| ATOM | 283 | OE1 | GLU | A | 42 | 6.357  | 17.995 | 34.620 | 1.00 | 39.95 | O |
| ATOM | 284 | OE2 | GLU | A | 42 | 4.456  | 17.236 | 35.419 | 1.00 | 41.67 | O |
| ATOM | 285 | C   | GLU | A | 42 | 9.711  | 14.310 | 36.148 | 1.00 | 20.05 | C |
| ATOM | 286 | O   | GLU | A | 42 | 10.753 | 14.828 | 35.739 | 1.00 | 23.94 | O |
| ATOM | 287 | N   | VAL | A | 43 | 9.456  | 13.005 | 36.044 | 1.00 | 19.20 | N |
| ATOM | 288 | CA  | VAL | A | 43 | 10.311 | 12.094 | 35.258 | 1.00 | 17.75 | C |
| ATOM | 289 | CB  | VAL | A | 43 | 11.345 | 11.296 | 36.123 | 1.00 | 16.38 | C |
| ATOM | 290 | CG1 | VAL | A | 43 | 12.390 | 12.205 | 36.768 | 1.00 | 20.48 | C |
| ATOM | 291 | CG2 | VAL | A | 43 | 10.647 | 10.414 | 37.155 | 1.00 | 21.08 | C |
| ATOM | 292 | C   | VAL | A | 43 | 9.448  | 11.101 | 34.468 | 1.00 | 16.58 | C |
| ATOM | 293 | O   | VAL | A | 43 | 8.231  | 11.024 | 34.664 | 1.00 | 16.92 | O |
| ATOM | 294 | N   | ALA | A | 44 | 10.102 | 10.365 | 33.571 | 1.00 | 17.99 | N |
| ATOM | 295 | CA  | ALA | A | 44 | 9.520  | 9.204  | 32.902 | 1.00 | 17.39 | C |
| ATOM | 296 | CB  | ALA | A | 44 | 9.619  | 9.339  | 31.386 | 1.00 | 19.96 | C |
| ATOM | 297 | C   | ALA | A | 44 | 10.280 | 7.977  | 33.378 | 1.00 | 16.90 | C |
| ATOM | 298 | O   | ALA | A | 44 | 11.505 | 7.991  | 33.444 | 1.00 | 21.63 | O |
| ATOM | 299 | N   | VAL | A | 45 | 9.548  | 6.930  | 33.744 | 1.00 | 17.88 | N |
| ATOM | 300 | CA  | VAL | A | 45 | 10.180 | 5.679  | 34.151 | 1.00 | 17.13 | C |
| ATOM | 301 | CB  | VAL | A | 45 | 9.742  | 5.204  | 35.558 | 1.00 | 17.16 | C |
| ATOM | 302 | CG1 | VAL | A | 45 | 10.566 | 3.994  | 35.990 | 1.00 | 20.19 | C |
| ATOM | 303 | CG2 | VAL | A | 45 | 9.887  | 6.328  | 36.577 | 1.00 | 19.76 | C |
| ATOM | 304 | C   | VAL | A | 45 | 9.878  | 4.621  | 33.097 | 1.00 | 14.02 | C |
| ATOM | 305 | O   | VAL | A | 45 | 8.725  | 4.216  | 32.917 | 1.00 | 15.54 | O |
| ATOM | 306 | N   | LYS | A | 46 | 10.937 | 4.204  | 32.411 | 1.00 | 15.06 | N |
| ATOM | 307 | CA  | LYS | A | 46 | 10.868 | 3.162  | 31.376 | 1.00 | 16.44 | C |
| ATOM | 308 | CB  | LYS | A | 46 | 11.886 | 3.482  | 30.269 | 1.00 | 17.06 | C |
| ATOM | 309 | CG  | LYS | A | 46 | 11.706 | 2.694  | 28.979 | 1.00 | 20.35 | C |
| ATOM | 310 | CD  | LYS | A | 46 | 12.594 | 3.290  | 27.898 | 1.00 | 17.59 | C |
| ATOM | 311 | CE  | LYS | A | 46 | 12.359 | 2.646  | 26.534 | 1.00 | 18.12 | C |
| ATOM | 312 | NZ  | LYS | A | 46 | 13.199 | 3.314  | 25.506 | 1.00 | 18.34 | N |
| ATOM | 313 | C   | LYS | A | 46 | 11.116 | 1.778  | 31.978 | 1.00 | 19.23 | C |
| ATOM | 314 | O   | LYS | A | 46 | 12.164 | 1.533  | 32.589 | 1.00 | 18.59 | O |
| ATOM | 315 | N   | CYS | A | 47 | 10.139 | 0.885  | 31.805 | 1.00 | 16.70 | N |
| ATOM | 316 | CA  | CYS | A | 47 | 10.172 | -0.448 | 32.412 | 1.00 | 18.46 | C |
| ATOM | 317 | CB  | CYS | A | 47 | 8.964  | -0.641 | 33.325 | 1.00 | 20.56 | C |

|      |     |     |     |   |    |        |         |        |      |       |   |
|------|-----|-----|-----|---|----|--------|---------|--------|------|-------|---|
| ATOM | 318 | SG  | CYS | A | 47 | 8.648  | 0.732   | 34.449 | 1.00 | 22.42 | S |
| ATOM | 319 | C   | CYS | A | 47 | 10.172 | -1.527  | 31.345 | 1.00 | 21.28 | C |
| ATOM | 320 | O   | CYS | A | 47 | 9.891  | -1.248  | 30.177 | 1.00 | 19.34 | O |
| ATOM | 321 | N   | ILE | A | 48 | 10.485 | -2.754  | 31.763 | 1.00 | 20.91 | N |
| ATOM | 322 | CA  | ILE | A | 48 | 10.367 | -3.951  | 30.927 | 1.00 | 22.90 | C |
| ATOM | 323 | CB  | ILE | A | 48 | 10.931 | -5.209  | 31.663 | 1.00 | 29.86 | C |
| ATOM | 324 | CG1 | ILE | A | 48 | 12.456 | -5.078  | 31.810 | 1.00 | 30.78 | C |
| ATOM | 325 | CD1 | ILE | A | 48 | 13.188 | -6.320  | 32.270 | 1.00 | 45.25 | C |
| ATOM | 326 | CG2 | ILE | A | 48 | 10.553 | -6.517  | 30.961 | 1.00 | 36.45 | C |
| ATOM | 327 | C   | ILE | A | 48 | 8.921  | -4.150  | 30.463 | 1.00 | 22.99 | C |
| ATOM | 328 | O   | ILE | A | 48 | 7.977  | -3.836  | 31.192 | 1.00 | 22.29 | O |
| ATOM | 329 | N   | ASN | A | 49 | 8.763  | -4.602  | 29.220 | 1.00 | 20.28 | N |
| ATOM | 330 | CA  | ASN | A | 49 | 7.497  | -5.151  | 28.772 | 1.00 | 20.64 | C |
| ATOM | 331 | CB  | ASN | A | 49 | 7.164  | -4.734  | 27.334 | 1.00 | 22.71 | C |
| ATOM | 332 | CG  | ASN | A | 49 | 5.750  | -5.127  | 26.923 | 1.00 | 25.76 | C |
| ATOM | 333 | OD1 | ASN | A | 49 | 5.144  | -6.039  | 27.499 | 1.00 | 31.96 | O |
| ATOM | 334 | ND2 | ASN | A | 49 | 5.218  | -4.444  | 25.914 | 1.00 | 24.31 | N |
| ATOM | 335 | C   | ASN | A | 49 | 7.585  | -6.666  | 28.892 | 1.00 | 27.16 | C |
| ATOM | 336 | O   | ASN | A | 49 | 8.314  | -7.317  | 28.128 | 1.00 | 21.43 | O |
| ATOM | 337 | N   | LYS | A | 50 | 6.838  | -7.206  | 29.859 | 1.00 | 28.19 | N |
| ATOM | 338 | CA  | LYS | A | 50 | 6.845  | -8.642  | 30.188 | 1.00 | 30.04 | C |
| ATOM | 339 | CB  | LYS | A | 50 | 6.071  | -8.900  | 31.482 | 1.00 | 35.21 | C |
| ATOM | 340 | CG  | LYS | A | 50 | 6.735  | -8.362  | 32.744 | 1.00 | 36.87 | C |
| ATOM | 341 | CD  | LYS | A | 50 | 6.021  | -8.860  | 33.993 | 1.00 | 43.54 | C |
| ATOM | 342 | CE  | LYS | A | 50 | 4.699  | -8.144  | 34.221 | 1.00 | 45.81 | C |
| ATOM | 343 | NZ  | LYS | A | 50 | 3.790  | -8.909  | 35.119 | 1.00 | 59.03 | N |
| ATOM | 344 | C   | LYS | A | 50 | 6.316  | -9.567  | 29.088 | 1.00 | 30.55 | C |
| ATOM | 345 | O   | LYS | A | 50 | 6.601  | -10.772 | 29.103 | 1.00 | 23.34 | O |
| ATOM | 346 | N   | LYS | A | 51 | 5.550  | -9.012  | 28.146 | 1.00 | 29.29 | N |
| ATOM | 347 | CA  | LYS | A | 51 | 5.104  | -9.746  | 26.954 | 1.00 | 28.14 | C |
| ATOM | 348 | CB  | LYS | A | 51 | 4.158  | -8.886  | 26.114 | 1.00 | 28.95 | C |
| ATOM | 349 | CG  | LYS | A | 51 | 3.270  | -9.651  | 25.138 | 1.00 | 32.50 | C |
| ATOM | 350 | CD  | LYS | A | 51 | 2.296  | -8.704  | 24.453 | 1.00 | 34.49 | C |
| ATOM | 351 | CE  | LYS | A | 51 | 1.582  | -9.357  | 23.276 | 1.00 | 29.80 | C |
| ATOM | 352 | NZ  | LYS | A | 51 | 0.641  | -8.404  | 22.613 | 1.00 | 26.32 | N |
| ATOM | 353 | C   | LYS | A | 51 | 6.295  | -10.198 | 26.104 | 1.00 | 28.01 | C |
| ATOM | 354 | O   | LYS | A | 51 | 6.219  | -11.222 | 25.419 | 1.00 | 33.12 | O |
| ATOM | 355 | N   | ASN | A | 52 | 7.381  | -9.425  | 26.158 | 1.00 | 24.32 | N |
| ATOM | 356 | CA  | ASN | A | 52 | 8.613  | -9.716  | 25.433 | 1.00 | 25.42 | C |
| ATOM | 357 | CB  | ASN | A | 52 | 8.755  | -8.773  | 24.228 | 1.00 | 24.29 | C |
| ATOM | 358 | CG  | ASN | A | 52 | 7.653  | -8.973  | 23.208 | 1.00 | 24.48 | C |
| ATOM | 359 | OD1 | ASN | A | 52 | 7.567  | -10.030 | 22.583 | 1.00 | 29.22 | O |



|      |     |              |        |         |        |      |       |   |
|------|-----|--------------|--------|---------|--------|------|-------|---|
| ATOM | 360 | ND2 ASN A 52 | 6.797  | -7.967  | 23.043 | 1.00 | 21.64 | N |
| ATOM | 361 | C ASN A 52   | 9.807  | -9.596  | 26.365 | 1.00 | 25.47 | C |
| ATOM | 362 | O ASN A 52   | 10.779 | -8.901  | 26.056 | 1.00 | 24.17 | O |
| ATOM | 363 | N LEU A 53   | 9.723  | -10.299 | 27.497 | 1.00 | 24.91 | N |
| ATOM | 364 | CA LEU A 53  | 10.647 | -10.119 | 28.631 | 1.00 | 28.67 | C |
| ATOM | 365 | CB LEU A 53  | 10.345 | -11.124 | 29.763 | 1.00 | 28.64 | C |
| ATOM | 366 | CG LEU A 53  | 10.943 | -10.844 | 31.157 | 1.00 | 34.53 | C |
| ATOM | 367 | CD1 LEU A 53 | 9.958  | -11.212 | 32.259 | 1.00 | 47.99 | C |
| ATOM | 368 | CD2 LEU A 53 | 12.275 | -11.549 | 31.385 | 1.00 | 46.23 | C |
| ATOM | 369 | C LEU A 53   | 12.121 | -10.160 | 28.256 | 1.00 | 27.96 | C |
| ATOM | 370 | O LEU A 53   | 12.841 | -9.188  | 28.493 | 1.00 | 24.97 | O |
| ATOM | 371 | N ALA A 54   | 12.562 | -11.280 | 27.682 | 1.00 | 34.18 | N |
| ATOM | 372 | CA ALA A 54  | 13.979 | -11.492 | 27.376 | 1.00 | 33.95 | C |
| ATOM | 373 | CB ALA A 54  | 14.197 | -12.853 | 26.721 | 1.00 | 32.31 | C |
| ATOM | 374 | C ALA A 54   | 14.543 | -10.368 | 26.508 | 1.00 | 28.98 | C |
| ATOM | 375 | O ALA A 54   | 15.564 | -9.753  | 26.859 | 1.00 | 25.26 | O |
| ATOM | 376 | N LYS A 55   | 13.855 | -10.084 | 25.401 | 1.00 | 26.46 | N |
| ATOM | 377 | CA LYS A 55  | 14.288 | -9.047  | 24.462 | 1.00 | 23.25 | C |
| ATOM | 378 | CB LYS A 55  | 13.484 | -9.120  | 23.155 | 1.00 | 22.73 | C |
| ATOM | 379 | CG LYS A 55  | 13.994 | -8.220  | 22.037 | 1.00 | 25.09 | C |
| ATOM | 380 | CD LYS A 55  | 15.368 | -8.620  | 21.522 | 1.00 | 31.31 | C |
| ATOM | 381 | CE LYS A 55  | 15.746 | -7.790  | 20.307 | 1.00 | 41.64 | C |
| ATOM | 382 | NZ LYS A 55  | 17.074 | -8.178  | 19.757 | 1.00 | 52.37 | N |
| ATOM | 383 | C LYS A 55   | 14.238 | -7.647  | 25.087 | 1.00 | 21.37 | C |
| ATOM | 384 | O LYS A 55   | 15.185 | -6.876  | 24.938 | 1.00 | 20.76 | O |
| ATOM | 385 | N SER A 56   | 13.152 | -7.357  | 25.804 | 1.00 | 22.87 | N |
| ATOM | 386 | CA SER A 56  | 12.968 | -6.092  | 26.530 | 1.00 | 21.61 | C |
| ATOM | 387 | CB SER A 56  | 11.624 | -6.105  | 27.270 | 1.00 | 21.29 | C |
| ATOM | 388 | OG SER A 56  | 11.454 | -4.954  | 28.071 | 1.00 | 22.73 | O |
| ATOM | 389 | C SER A 56   | 14.132 | -5.843  | 27.503 | 1.00 | 22.18 | C |
| ATOM | 390 | O SER A 56   | 14.733 | -4.767  | 27.499 | 1.00 | 18.06 | O |
| ATOM | 391 | N GLN A 57   | 14.462 | -6.863  | 28.299 | 1.00 | 22.28 | N |
| ATOM | 392 | CA GLN A 57  | 15.563 | -6.795  | 29.259 | 1.00 | 24.32 | C |
| ATOM | 393 | CB GLN A 57  | 15.642 | -8.093  | 30.077 | 1.00 | 26.92 | C |
| ATOM | 394 | CG GLN A 57  | 16.437 | -7.983  | 31.371 | 1.00 | 47.37 | C |
| ATOM | 395 | CD GLN A 57  | 15.907 | -8.879  | 32.485 | 1.00 | 54.92 | C |
| ATOM | 396 | OE1 GLN A 57 | 15.088 | -9.778  | 32.257 | 1.00 | 47.60 | O |
| ATOM | 397 | NE2 GLN A 57 | 16.375 | -8.631  | 33.706 | 1.00 | 51.99 | N |
| ATOM | 398 | C GLN A 57   | 16.885 | -6.498  | 28.563 | 1.00 | 20.07 | C |
| ATOM | 399 | O GLN A 57   | 17.624 | -5.618  | 29.012 | 1.00 | 20.46 | O |
| ATOM | 400 | N THR A 58   | 17.162 | -7.221  | 27.470 | 1.00 | 21.62 | N |
| ATOM | 401 | CA THR A 58  | 18.365 | -7.017  | 26.650 | 1.00 | 24.18 | C |

|      |     |     |     |   |    |        |        |        |      |       |   |
|------|-----|-----|-----|---|----|--------|--------|--------|------|-------|---|
| ATOM | 402 | CB  | THR | A | 58 | 18.458 | -8.042 | 25.480 | 1.00 | 29.27 | C |
| ATOM | 403 | OG1 | THR | A | 58 | 18.272 | -9.372 | 25.980 | 1.00 | 33.83 | O |
| ATOM | 404 | CG2 | THR | A | 58 | 19.816 | -7.970 | 24.774 | 1.00 | 31.13 | C |
| ATOM | 405 | C   | THR | A | 58 | 18.417 | -5.594 | 26.095 | 1.00 | 22.42 | C |
| ATOM | 406 | O   | THR | A | 58 | 19.459 | -4.943 | 26.154 | 1.00 | 19.70 | O |
| ATOM | 407 | N   | LEU | A | 59 | 17.289 | -5.112 | 25.571 | 1.00 | 19.71 | N |
| ATOM | 408 | CA  | LEU | A | 59 | 17.255 | -3.790 | 24.943 | 1.00 | 19.18 | C |
| ATOM | 409 | CB  | LEU | A | 59 | 15.981 | -3.616 | 24.106 | 1.00 | 16.27 | C |
| ATOM | 410 | CG  | LEU | A | 59 | 15.936 | -4.441 | 22.804 | 1.00 | 19.15 | C |
| ATOM | 411 | CD1 | LEU | A | 59 | 14.536 | -4.431 | 22.225 | 1.00 | 18.55 | C |
| ATOM | 412 | CD2 | LEU | A | 59 | 16.950 | -3.968 | 21.765 | 1.00 | 18.44 | C |
| ATOM | 413 | C   | LEU | A | 59 | 17.423 | -2.643 | 25.942 | 1.00 | 18.40 | C |
| ATOM | 414 | O   | LEU | A | 59 | 18.103 | -1.661 | 25.653 | 1.00 | 20.62 | O |
| ATOM | 415 | N   | LEU | A | 60 | 16.812 | -2.778 | 27.115 | 1.00 | 18.37 | N |
| ATOM | 416 | CA  | LEU | A | 60 | 16.906 | -1.738 | 28.138 | 1.00 | 19.65 | C |
| ATOM | 417 | CB  | LEU | A | 60 | 15.825 | -1.908 | 29.213 | 1.00 | 19.04 | C |
| ATOM | 418 | CG  | LEU | A | 60 | 14.378 | -1.658 | 28.756 | 1.00 | 21.27 | C |
| ATOM | 419 | CD1 | LEU | A | 60 | 13.408 | -2.094 | 29.834 | 1.00 | 20.71 | C |
| ATOM | 420 | CD2 | LEU | A | 60 | 14.119 | -0.210 | 28.364 | 1.00 | 22.50 | C |
| ATOM | 421 | C   | LEU | A | 60 | 18.310 | -1.672 | 28.731 | 1.00 | 21.30 | C |
| ATOM | 422 | O   | LEU | A | 60 | 18.823 | -0.582 | 28.988 | 1.00 | 20.77 | O |
| ATOM | 423 | N   | GLY | A | 61 | 18.935 | -2.839 | 28.897 | 1.00 | 23.78 | N |
| ATOM | 424 | CA  | GLY | A | 61 | 20.350 | -2.925 | 29.281 | 1.00 | 23.49 | C |
| ATOM | 425 | C   | GLY | A | 61 | 21.254 | -2.186 | 28.309 | 1.00 | 25.87 | C |
| ATOM | 426 | O   | GLY | A | 61 | 22.089 | -1.380 | 28.727 | 1.00 | 23.77 | O |
| ATOM | 427 | N   | LYS | A | 62 | 21.065 | -2.442 | 27.011 | 1.00 | 26.58 | N |
| ATOM | 428 | CA  | LYS | A | 62 | 21.835 | -1.787 | 25.942 | 1.00 | 24.83 | C |
| ATOM | 429 | CB  | LYS | A | 62 | 21.493 | -2.391 | 24.574 | 1.00 | 32.32 | C |
| ATOM | 430 | CG  | LYS | A | 62 | 22.064 | -3.784 | 24.352 | 1.00 | 41.32 | C |
| ATOM | 431 | CD  | LYS | A | 62 | 21.548 | -4.418 | 23.070 | 1.00 | 45.55 | C |
| ATOM | 432 | CE  | LYS | A | 62 | 22.219 | -5.759 | 22.805 | 1.00 | 46.64 | C |
| ATOM | 433 | NZ  | LYS | A | 62 | 23.668 | -5.618 | 22.478 | 1.00 | 46.07 | N |
| ATOM | 434 | C   | LYS | A | 62 | 21.626 | -0.278 | 25.924 | 1.00 | 22.65 | C |
| ATOM | 435 | O   | LYS | A | 62 | 22.584 | 0.486  | 25.758 | 1.00 | 25.98 | O |
| ATOM | 436 | N   | GLU | A | 63 | 20.372 | 0.137  | 26.119 | 1.00 | 22.82 | N |
| ATOM | 437 | CA  | GLU | A | 63 | 20.002 | 1.552  | 26.185 | 1.00 | 21.36 | C |
| ATOM | 438 | CB  | GLU | A | 63 | 18.480 | 1.731  | 26.241 | 1.00 | 17.99 | C |
| ATOM | 439 | CG  | GLU | A | 63 | 18.042 | 3.189  | 26.166 | 1.00 | 18.63 | C |
| ATOM | 440 | CD  | GLU | A | 63 | 16.578 | 3.386  | 25.811 | 1.00 | 19.09 | C |
| ATOM | 441 | OE1 | GLU | A | 63 | 15.719 | 2.561  | 26.184 | 1.00 | 20.91 | O |
| ATOM | 442 | OE2 | GLU | A | 63 | 16.284 | 4.408  | 25.163 | 1.00 | 22.17 | O |
| ATOM | 443 | C   | GLU | A | 63 | 20.681 | 2.275  | 27.354 | 1.00 | 17.92 | C |

|      |     |     |          |        |       |        |      |       |   |
|------|-----|-----|----------|--------|-------|--------|------|-------|---|
| ATOM | 444 | O   | GLU A 63 | 21.158 | 3.397 | 27.179 | 1.00 | 20.28 | O |
| ATOM | 445 | N   | ILE A 64 | 20.728 | 1.636 | 28.527 | 1.00 | 21.14 | N |
| ATOM | 446 | CA  | ILE A 64 | 21.490 | 2.181 | 29.672 | 1.00 | 21.17 | C |
| ATOM | 447 | CB  | ILE A 64 | 21.456 | 1.251 | 30.919 | 1.00 | 20.74 | C |
| ATOM | 448 | CG1 | ILE A 64 | 20.055 | 1.259 | 31.540 | 1.00 | 19.55 | C |
| ATOM | 449 | CD1 | ILE A 64 | 19.770 | 0.136 | 32.517 | 1.00 | 21.24 | C |
| ATOM | 450 | CG2 | ILE A 64 | 22.482 | 1.689 | 31.968 | 1.00 | 22.66 | C |
| ATOM | 451 | C   | ILE A 64 | 22.920 | 2.504 | 29.221 | 1.00 | 22.38 | C |
| ATOM | 452 | O   | ILE A 64 | 23.363 | 3.647 | 29.346 | 1.00 | 24.45 | O |
| ATOM | 453 | N   | LYS A 65 | 23.602 | 1.510 | 28.650 | 1.00 | 22.23 | N |
| ATOM | 454 | CA  | LYS A 65 | 25.009 | 1.646 | 28.241 | 1.00 | 27.25 | C |
| ATOM | 455 | CB  | LYS A 65 | 25.563 | 0.301 | 27.755 | 1.00 | 28.98 | C |
| ATOM | 456 | C   | LYS A 65 | 25.254 | 2.735 | 27.190 | 1.00 | 30.45 | C |
| ATOM | 457 | O   | LYS A 65 | 26.265 | 3.429 | 27.252 | 1.00 | 28.21 | O |
| ATOM | 458 | N   | ILE A 66 | 24.325 | 2.886 | 26.242 | 1.00 | 30.66 | N |
| ATOM | 459 | CA  | ILE A 66 | 24.430 | 3.897 | 25.175 | 1.00 | 30.12 | C |
| ATOM | 460 | CB  | ILE A 66 | 23.461 | 3.585 | 23.988 | 1.00 | 33.04 | C |
| ATOM | 461 | CG1 | ILE A 66 | 23.922 | 2.340 | 23.204 | 1.00 | 32.45 | C |
| ATOM | 462 | CD1 | ILE A 66 | 25.121 | 2.535 | 22.288 | 1.00 | 38.12 | C |
| ATOM | 463 | CG2 | ILE A 66 | 23.281 | 4.782 | 23.050 | 1.00 | 32.47 | C |
| ATOM | 464 | C   | ILE A 66 | 24.214 | 5.313 | 25.724 | 1.00 | 29.94 | C |
| ATOM | 465 | O   | ILE A 66 | 25.020 | 6.210 | 25.468 | 1.00 | 33.86 | O |
| ATOM | 466 | N   | LEU A 67 | 23.133 | 5.498 | 26.482 | 1.00 | 28.18 | N |
| ATOM | 467 | CA  | LEU A 67 | 22.751 | 6.820 | 26.995 | 1.00 | 31.19 | C |
| ATOM | 468 | CB  | LEU A 67 | 21.311 | 6.819 | 27.515 | 1.00 | 24.77 | C |
| ATOM | 469 | CG  | LEU A 67 | 20.219 | 6.750 | 26.443 | 1.00 | 28.61 | C |
| ATOM | 470 | CD1 | LEU A 67 | 18.888 | 6.642 | 27.147 | 1.00 | 21.97 | C |
| ATOM | 471 | CD2 | LEU A 67 | 20.225 | 7.953 | 25.504 | 1.00 | 25.63 | C |
| ATOM | 472 | C   | LEU A 67 | 23.690 | 7.421 | 28.041 | 1.00 | 30.59 | C |
| ATOM | 473 | O   | LEU A 67 | 23.738 | 8.643 | 28.190 | 1.00 | 33.93 | O |
| ATOM | 474 | N   | LYS A 68 | 24.419 | 6.563 | 28.755 | 1.00 | 37.71 | N |
| ATOM | 475 | CA  | LYS A 68 | 25.485 | 6.994 | 29.672 | 1.00 | 44.59 | C |
| ATOM | 476 | CB  | LYS A 68 | 26.123 | 5.788 | 30.369 | 1.00 | 44.77 | C |
| ATOM | 477 | CG  | LYS A 68 | 25.302 | 5.245 | 31.529 | 1.00 | 49.96 | C |
| ATOM | 478 | CD  | LYS A 68 | 25.677 | 3.813 | 31.880 | 1.00 | 56.47 | C |
| ATOM | 479 | CE  | LYS A 68 | 26.601 | 3.739 | 33.085 | 1.00 | 63.32 | C |
| ATOM | 480 | NZ  | LYS A 68 | 26.588 | 2.375 | 33.684 | 1.00 | 58.96 | N |
| ATOM | 481 | C   | LYS A 68 | 26.549 | 7.817 | 28.945 | 1.00 | 47.34 | C |
| ATOM | 482 | O   | LYS A 68 | 27.125 | 8.741 | 29.525 | 1.00 | 52.86 | O |
| ATOM | 483 | N   | GLU A 69 | 26.776 | 7.482 | 27.672 | 1.00 | 49.23 | N |
| ATOM | 484 | CA  | GLU A 69 | 27.753 | 8.157 | 26.815 | 1.00 | 45.86 | C |
| ATOM | 485 | CB  | GLU A 69 | 28.411 | 7.147 | 25.868 | 1.00 | 57.57 | C |

|      |     |     |     |   |    |        |        |        |      |       |   |
|------|-----|-----|-----|---|----|--------|--------|--------|------|-------|---|
| ATOM | 486 | C   | GLU | A | 69 | 27.173 | 9.330  | 26.016 | 1.00 | 47.61 | C |
| ATOM | 487 | O   | GLU | A | 69 | 27.923 | 10.198 | 25.564 | 1.00 | 54.59 | O |
| ATOM | 488 | N   | LEU | A | 70 | 25.850 | 9.355  | 25.844 | 1.00 | 42.51 | N |
| ATOM | 489 | CA  | LEU | A | 70 | 25.183 | 10.408 | 25.068 | 1.00 | 40.47 | C |
| ATOM | 490 | CB  | LEU | A | 70 | 24.189 | 9.815  | 24.062 | 1.00 | 42.11 | C |
| ATOM | 491 | CG  | LEU | A | 70 | 24.680 | 8.984  | 22.876 | 1.00 | 40.90 | C |
| ATOM | 492 | CD1 | LEU | A | 70 | 23.468 | 8.355  | 22.216 | 1.00 | 38.75 | C |
| ATOM | 493 | CD2 | LEU | A | 70 | 25.480 | 9.800  | 21.870 | 1.00 | 35.73 | C |
| ATOM | 494 | C   | LEU | A | 70 | 24.472 | 11.434 | 25.935 | 1.00 | 40.34 | C |
| ATOM | 495 | O   | LEU | A | 70 | 23.549 | 11.097 | 26.677 | 1.00 | 51.75 | O |
| ATOM | 496 | N   | LYS | A | 71 | 24.914 | 12.686 | 25.833 | 1.00 | 32.14 | N |
| ATOM | 497 | CA  | LYS | A | 71 | 24.278 | 13.816 | 26.517 | 1.00 | 33.10 | C |
| ATOM | 498 | CB  | LYS | A | 71 | 25.091 | 14.259 | 27.744 | 1.00 | 38.14 | C |
| ATOM | 499 | CG  | LYS | A | 71 | 25.128 | 13.254 | 28.886 | 1.00 | 44.00 | C |
| ATOM | 500 | CD  | LYS | A | 71 | 26.141 | 13.662 | 29.942 | 1.00 | 53.12 | C |
| ATOM | 501 | CE  | LYS | A | 71 | 26.417 | 12.525 | 30.913 | 1.00 | 60.89 | C |
| ATOM | 502 | NZ  | LYS | A | 71 | 27.605 | 12.812 | 31.765 | 1.00 | 68.29 | N |
| ATOM | 503 | C   | LYS | A | 71 | 24.124 | 14.966 | 25.526 | 1.00 | 36.43 | C |
| ATOM | 504 | O   | LYS | A | 71 | 25.117 | 15.491 | 25.013 | 1.00 | 31.87 | O |
| ATOM | 505 | N   | HIS | A | 72 | 22.870 | 15.326 | 25.247 | 1.00 | 29.30 | N |
| ATOM | 506 | CA  | HIS | A | 72 | 22.524 | 16.376 | 24.281 | 1.00 | 24.93 | C |
| ATOM | 507 | CB  | HIS | A | 72 | 22.605 | 15.829 | 22.845 | 1.00 | 22.84 | C |
| ATOM | 508 | CG  | HIS | A | 72 | 22.632 | 16.892 | 21.788 | 1.00 | 23.62 | C |
| ATOM | 509 | ND1 | HIS | A | 72 | 21.485 | 17.454 | 21.266 | 1.00 | 23.37 | N |
| ATOM | 510 | CE1 | HIS | A | 72 | 21.811 | 18.360 | 20.363 | 1.00 | 26.12 | C |
| ATOM | 511 | NE2 | HIS | A | 72 | 23.130 | 18.406 | 20.277 | 1.00 | 25.31 | N |
| ATOM | 512 | CD2 | HIS | A | 72 | 23.667 | 17.494 | 21.154 | 1.00 | 26.40 | C |
| ATOM | 513 | C   | HIS | A | 72 | 21.123 | 16.890 | 24.576 | 1.00 | 23.94 | C |
| ATOM | 514 | O   | HIS | A | 72 | 20.259 | 16.125 | 25.018 | 1.00 | 24.61 | O |
| ATOM | 515 | N   | GLU | A | 73 | 20.888 | 18.177 | 24.318 | 1.00 | 22.06 | N |
| ATOM | 516 | CA  | GLU | A | 73 | 19.585 | 18.807 | 24.590 | 1.00 | 25.53 | C |
| ATOM | 517 | CB  | GLU | A | 73 | 19.647 | 20.332 | 24.394 | 1.00 | 29.58 | C |
| ATOM | 518 | CG  | GLU | A | 73 | 19.960 | 20.812 | 22.983 | 1.00 | 37.45 | C |
| ATOM | 519 | CD  | GLU | A | 73 | 19.594 | 22.271 | 22.755 | 1.00 | 58.96 | C |
| ATOM | 520 | OE1 | GLU | A | 73 | 18.396 | 22.616 | 22.855 | 1.00 | 56.66 | O |
| ATOM | 521 | OE2 | GLU | A | 73 | 20.501 | 23.077 | 22.460 | 1.00 | 59.36 | O |
| ATOM | 522 | C   | GLU | A | 73 | 18.421 | 18.199 | 23.782 | 1.00 | 24.58 | C |
| ATOM | 523 | O   | GLU | A | 73 | 17.256 | 18.336 | 24.170 | 1.00 | 22.76 | O |
| ATOM | 524 | N   | ASN | A | 74 | 18.762 | 17.535 | 22.678 | 1.00 | 23.61 | N |
| ATOM | 525 | CA  | ASN | A | 74 | 17.783 | 16.867 | 21.802 | 1.00 | 21.46 | C |
| ATOM | 526 | CB  | ASN | A | 74 | 17.890 | 17.410 | 20.366 | 1.00 | 20.38 | C |
| ATOM | 527 | CG  | ASN | A | 74 | 17.629 | 18.895 | 20.286 | 1.00 | 19.94 | C |

|      |     |              |        |        |        |      |       |   |
|------|-----|--------------|--------|--------|--------|------|-------|---|
| ATOM | 528 | OD1 ASN A 74 | 18.518 | 19.672 | 19.938 | 1.00 | 22.24 | O |
| ATOM | 529 | ND2 ASN A 74 | 16.405 | 19.301 | 20.601 | 1.00 | 21.07 | N |
| ATOM | 530 | C ASN A 74   | 17.855 | 15.332 | 21.830 | 1.00 | 20.72 | C |
| ATOM | 531 | O ASN A 74   | 17.323 | 14.650 | 20.930 | 1.00 | 20.10 | O |
| ATOM | 532 | N ILE A 75   | 18.524 | 14.797 | 22.853 | 1.00 | 18.38 | N |
| ATOM | 533 | CA ILE A 75  | 18.465 | 13.372 | 23.188 | 1.00 | 20.18 | C |
| ATOM | 534 | CB ILE A 75  | 19.846 | 12.676 | 23.076 | 1.00 | 19.81 | C |
| ATOM | 535 | CG1 ILE A 75 | 20.381 | 12.766 | 21.630 | 1.00 | 19.47 | C |
| ATOM | 536 | CD1 ILE A 75 | 21.816 | 12.304 | 21.421 | 1.00 | 19.88 | C |
| ATOM | 537 | CG2 ILE A 75 | 19.771 | 11.222 | 23.550 | 1.00 | 16.13 | C |
| ATOM | 538 | C ILE A 75   | 17.906 | 13.277 | 24.607 | 1.00 | 23.43 | C |
| ATOM | 539 | O ILE A 75   | 18.418 | 13.933 | 25.519 | 1.00 | 21.61 | O |
| ATOM | 540 | N VAL A 76   | 16.853 | 12.474 | 24.791 | 1.00 | 20.24 | N |
| ATOM | 541 | CA VAL A 76  | 16.266 | 12.262 | 26.125 | 1.00 | 22.88 | C |
| ATOM | 542 | CB VAL A 76  | 15.132 | 11.196 | 26.107 | 1.00 | 23.55 | C |
| ATOM | 543 | CG1 VAL A 76 | 15.649 | 9.819  | 25.704 | 1.00 | 28.24 | C |
| ATOM | 544 | CG2 VAL A 76 | 14.413 | 11.132 | 27.450 | 1.00 | 22.72 | C |
| ATOM | 545 | C VAL A 76   | 17.369 | 11.916 | 27.146 | 1.00 | 23.11 | C |
| ATOM | 546 | O VAL A 76   | 18.159 | 10.991 | 26.928 | 1.00 | 23.30 | O |
| ATOM | 547 | N ALA A 77   | 17.420 | 12.686 | 28.231 | 1.00 | 26.42 | N |
| ATOM | 548 | CA ALA A 77  | 18.416 | 12.486 | 29.294 | 1.00 | 31.73 | C |
| ATOM | 549 | CB ALA A 77  | 18.506 | 13.727 | 30.165 | 1.00 | 27.80 | C |
| ATOM | 550 | C ALA A 77   | 18.110 | 11.257 | 30.156 | 1.00 | 27.15 | C |
| ATOM | 551 | O ALA A 77   | 16.946 | 10.933 | 30.386 | 1.00 | 25.50 | O |
| ATOM | 552 | N LEU A 78   | 19.164 | 10.585 | 30.620 | 1.00 | 27.35 | N |
| ATOM | 553 | CA LEU A 78  | 19.048 | 9.506  | 31.600 | 1.00 | 22.72 | C |
| ATOM | 554 | CB LEU A 78  | 19.839 | 8.262  | 31.151 | 1.00 | 21.95 | C |
| ATOM | 555 | CG LEU A 78  | 19.866 | 7.016  | 32.054 | 1.00 | 22.95 | C |
| ATOM | 556 | CD1 LEU A 78 | 18.537 | 6.270  | 32.069 | 1.00 | 21.20 | C |
| ATOM | 557 | CD2 LEU A 78 | 20.997 | 6.082  | 31.647 | 1.00 | 23.45 | C |
| ATOM | 558 | C LEU A 78   | 19.516 | 10.016 | 32.969 | 1.00 | 25.32 | C |
| ATOM | 559 | O LEU A 78   | 20.669 | 10.446 | 33.124 | 1.00 | 24.16 | O |
| ATOM | 560 | N TYR A 79   | 18.611 | 9.967  | 33.947 | 1.00 | 22.53 | N |
| ATOM | 561 | CA TYR A 79  | 18.877 | 10.476 | 35.289 | 1.00 | 26.79 | C |
| ATOM | 562 | CB TYR A 79  | 17.611 | 11.093 | 35.894 | 1.00 | 28.34 | C |
| ATOM | 563 | CG TYR A 79  | 17.035 | 12.297 | 35.168 | 1.00 | 27.13 | C |
| ATOM | 564 | CD1 TYR A 79 | 17.854 | 13.190 | 34.457 | 1.00 | 33.35 | C |
| ATOM | 565 | CE1 TYR A 79 | 17.314 | 14.297 | 33.808 | 1.00 | 28.07 | C |
| ATOM | 566 | CZ TYR A 79  | 15.947 | 14.536 | 33.885 | 1.00 | 28.15 | C |
| ATOM | 567 | OH TYR A 79  | 15.417 | 15.638 | 33.250 | 1.00 | 35.82 | O |
| ATOM | 568 | CE2 TYR A 79 | 15.118 | 13.680 | 34.596 | 1.00 | 26.24 | C |
| ATOM | 569 | CD2 TYR A 79 | 15.664 | 12.571 | 35.232 | 1.00 | 29.53 | C |

|      |     |     |     |   |    |        |        |        |      |       |   |
|------|-----|-----|-----|---|----|--------|--------|--------|------|-------|---|
| ATOM | 570 | C   | TYR | A | 79 | 19.410 | 9.396  | 36.233 | 1.00 | 33.16 | C |
| ATOM | 571 | O   | TYR | A | 79 | 20.306 | 9.657  | 37.048 | 1.00 | 30.61 | O |
| ATOM | 572 | N   | ASP | A | 80 | 18.831 | 8.199  | 36.125 | 1.00 | 27.77 | N |
| ATOM | 573 | CA  | ASP | A | 80 | 19.117 | 7.059  | 37.004 | 1.00 | 27.17 | C |
| ATOM | 574 | CB  | ASP | A | 80 | 18.420 | 7.250  | 38.364 | 1.00 | 28.62 | C |
| ATOM | 575 | CG  | ASP | A | 80 | 18.962 | 6.323  | 39.459 | 1.00 | 31.81 | C |
| ATOM | 576 | OD1 | ASP | A | 80 | 20.046 | 5.725  | 39.291 | 1.00 | 28.21 | O |
| ATOM | 577 | OD2 | ASP | A | 80 | 18.284 | 6.195  | 40.498 | 1.00 | 31.84 | O |
| ATOM | 578 | C   | ASP | A | 80 | 18.635 | 5.767  | 36.341 | 1.00 | 30.36 | C |
| ATOM | 579 | O   | ASP | A | 80 | 17.860 | 5.803  | 35.378 | 1.00 | 23.83 | O |
| ATOM | 580 | N   | PHE | A | 81 | 19.096 | 4.633  | 36.860 | 1.00 | 25.99 | N |
| ATOM | 581 | CA  | PHE | A | 81 | 18.731 | 3.307  | 36.353 | 1.00 | 29.17 | C |
| ATOM | 582 | CB  | PHE | A | 81 | 19.525 | 2.956  | 35.081 | 1.00 | 31.46 | C |
| ATOM | 583 | CG  | PHE | A | 81 | 21.017 | 3.080  | 35.230 | 1.00 | 35.54 | C |
| ATOM | 584 | CD1 | PHE | A | 81 | 21.789 | 1.978  | 35.612 | 1.00 | 40.74 | C |
| ATOM | 585 | CE1 | PHE | A | 81 | 23.170 | 2.090  | 35.741 | 1.00 | 43.98 | C |
| ATOM | 586 | CZ  | PHE | A | 81 | 23.794 | 3.307  | 35.481 | 1.00 | 52.70 | C |
| ATOM | 587 | CE2 | PHE | A | 81 | 23.041 | 4.409  | 35.093 | 1.00 | 49.61 | C |
| ATOM | 588 | CD2 | PHE | A | 81 | 21.661 | 4.292  | 34.964 | 1.00 | 40.90 | C |
| ATOM | 589 | C   | PHE | A | 81 | 18.941 | 2.233  | 37.415 | 1.00 | 32.69 | C |
| ATOM | 590 | O   | PHE | A | 81 | 19.810 | 2.385  | 38.279 | 1.00 | 29.79 | O |
| ATOM | 591 | N   | GLN | A | 82 | 18.145 | 1.164  | 37.330 | 1.00 | 29.25 | N |
| ATOM | 592 | CA  | GLN | A | 82 | 18.264 | -0.024 | 38.187 | 1.00 | 31.50 | C |
| ATOM | 593 | CB  | GLN | A | 82 | 17.200 | 0.012  | 39.300 | 1.00 | 34.69 | C |
| ATOM | 594 | CG  | GLN | A | 82 | 17.253 | -1.150 | 40.288 | 1.00 | 39.75 | C |
| ATOM | 595 | CD  | GLN | A | 82 | 15.904 | -1.457 | 40.912 | 1.00 | 46.93 | C |
| ATOM | 596 | OE1 | GLN | A | 82 | 15.267 | -2.457 | 40.574 | 1.00 | 62.21 | O |
| ATOM | 597 | NE2 | GLN | A | 82 | 15.458 | -0.597 | 41.826 | 1.00 | 39.98 | N |
| ATOM | 598 | C   | GLN | A | 82 | 18.114 | -1.308 | 37.351 | 1.00 | 39.33 | C |
| ATOM | 599 | O   | GLN | A | 82 | 17.119 | -1.475 | 36.631 | 1.00 | 30.09 | O |
| ATOM | 600 | N   | GLU | A | 83 | 19.097 | -2.205 | 37.464 | 1.00 | 43.74 | N |
| ATOM | 601 | CA  | GLU | A | 83 | 19.089 | -3.500 | 36.766 | 1.00 | 45.19 | C |
| ATOM | 602 | CB  | GLU | A | 83 | 20.315 | -3.639 | 35.855 | 1.00 | 44.70 | C |
| ATOM | 603 | CG  | GLU | A | 83 | 20.187 | -2.882 | 34.547 | 1.00 | 47.44 | C |
| ATOM | 604 | CD  | GLU | A | 83 | 21.245 | -3.249 | 33.522 | 1.00 | 47.20 | C |
| ATOM | 605 | OE1 | GLU | A | 83 | 22.334 | -2.639 | 33.536 | 1.00 | 44.75 | O |
| ATOM | 606 | OE2 | GLU | A | 83 | 20.973 | -4.130 | 32.679 | 1.00 | 48.18 | O |
| ATOM | 607 | C   | GLU | A | 83 | 18.982 | -4.693 | 37.723 | 1.00 | 47.96 | C |
| ATOM | 608 | O   | GLU | A | 83 | 19.954 | -5.063 | 38.385 | 1.00 | 69.32 | O |
| ATOM | 609 | N   | MET | A | 84 | 17.786 | -5.275 | 37.787 | 1.00 | 58.17 | N |
| ATOM | 610 | CA  | MET | A | 84 | 17.503 | -6.449 | 38.617 | 1.00 | 64.24 | C |
| ATOM | 611 | CB  | MET | A | 84 | 16.209 | -6.235 | 39.413 | 1.00 | 61.72 | C |

|        |     |     |     |   |    |        |         |        |      |       |   |
|--------|-----|-----|-----|---|----|--------|---------|--------|------|-------|---|
| ATOM   | 612 | C   | MET | A | 84 | 17.421 | -7.723  | 37.764 | 1.00 | 65.70 | C |
| ATOM   | 613 | O   | MET | A | 84 | 17.613 | -7.671  | 36.543 | 1.00 | 60.35 | O |
| ATOM   | 614 | N   | ALA | A | 85 | 17.133 | -8.853  | 38.414 | 1.00 | 64.70 | N |
| ATOM   | 615 | CA  | ALA | A | 85 | 17.132 | -10.177 | 37.780 | 1.00 | 59.51 | C |
| ATOM   | 616 | CB  | ALA | A | 85 | 16.986 | -11.265 | 38.832 | 1.00 | 50.56 | C |
| ATOM   | 617 | C   | ALA | A | 85 | 16.067 | -10.340 | 36.698 | 1.00 | 61.23 | C |
| ATOM   | 618 | O   | ALA | A | 85 | 16.364 | -10.822 | 35.602 | 1.00 | 68.36 | O |
| ATOM   | 619 | N   | ASN | A | 86 | 14.838 | -9.940  | 37.015 | 1.00 | 55.60 | N |
| ATOM   | 620 | CA  | ASN | A | 86 | 13.710 | -10.073 | 36.096 | 1.00 | 58.52 | C |
| ATOM   | 621 | CB  | ASN | A | 86 | 12.578 | -10.869 | 36.753 | 1.00 | 63.61 | C |
| ATOM   | 622 | C   | ASN | A | 86 | 13.192 | -8.737  | 35.558 | 1.00 | 57.29 | C |
| ATOM   | 623 | O   | ASN | A | 86 | 12.400 | -8.718  | 34.611 | 1.00 | 64.16 | O |
| HETATM | 624 | N   | SEP | A | 87 | 13.647 | -7.634  | 36.156 | 1.00 | 52.41 | N |
| HETATM | 625 | CA  | SEP | A | 87 | 13.211 | -6.282  | 35.772 | 1.00 | 54.79 | C |
| HETATM | 626 | CB  | SEP | A | 87 | 12.181 | -5.770  | 36.773 | 1.00 | 61.23 | C |
| HETATM | 627 | OG  | SEP | A | 87 | 12.826 | -5.399  | 37.987 | 1.00 | 75.80 | O |
| HETATM | 628 | P   | SEP | A | 87 | 12.323 | -5.959  | 39.408 | 1.00 | 82.94 | P |
| HETATM | 629 | O1P | SEP | A | 87 | 12.684 | -7.425  | 39.366 | 1.00 | 91.67 | O |
| HETATM | 630 | O2P | SEP | A | 87 | 13.136 | -5.139  | 40.386 | 1.00 | 63.80 | O |
| HETATM | 631 | O3P | SEP | A | 87 | 10.833 | -5.694  | 39.436 | 1.00 | 69.98 | O |
| HETATM | 632 | C   | SEP | A | 87 | 14.364 | -5.316  | 35.616 | 1.00 | 47.32 | C |
| HETATM | 633 | O   | SEP | A | 87 | 15.439 | -5.519  | 36.185 | 1.00 | 44.45 | O |
| ATOM   | 634 | N   | VAL | A | 88 | 14.139 | -4.269  | 34.817 | 1.00 | 29.97 | N |
| ATOM   | 635 | CA  | VAL | A | 88 | 15.111 | -3.197  | 34.559 | 1.00 | 25.53 | C |
| ATOM   | 636 | CB  | VAL | A | 88 | 15.904 | -3.419  | 33.234 | 1.00 | 31.18 | C |
| ATOM   | 637 | CG1 | VAL | A | 88 | 16.873 | -2.274  | 32.958 | 1.00 | 25.62 | C |
| ATOM   | 638 | CG2 | VAL | A | 88 | 16.685 | -4.729  | 33.243 | 1.00 | 41.02 | C |
| ATOM   | 639 | C   | VAL | A | 88 | 14.327 | -1.878  | 34.493 | 1.00 | 25.86 | C |
| ATOM   | 640 | O   | VAL | A | 88 | 13.230 | -1.840  | 33.933 | 1.00 | 26.63 | O |
| ATOM   | 641 | N   | TYR | A | 89 | 14.892 | -0.808  | 35.055 | 1.00 | 26.13 | N |
| ATOM   | 642 | CA  | TYR | A | 89 | 14.230 | 0.506   | 35.082 | 1.00 | 24.07 | C |
| ATOM   | 643 | CB  | TYR | A | 89 | 13.692 | 0.828   | 36.483 | 1.00 | 25.31 | C |
| ATOM   | 644 | CG  | TYR | A | 89 | 12.694 | -0.172  | 37.010 | 1.00 | 28.95 | C |
| ATOM   | 645 | CD1 | TYR | A | 89 | 13.117 | -1.267  | 37.775 | 1.00 | 29.59 | C |
| ATOM   | 646 | CE1 | TYR | A | 89 | 12.208 | -2.193  | 38.259 | 1.00 | 34.10 | C |
| ATOM   | 647 | CZ  | TYR | A | 89 | 10.858 | -2.040  | 37.976 | 1.00 | 37.78 | C |
| ATOM   | 648 | OH  | TYR | A | 89 | 9.969  | -2.968  | 38.460 | 1.00 | 38.33 | O |
| ATOM   | 649 | CE2 | TYR | A | 89 | 10.407 | -0.965  | 37.216 | 1.00 | 32.15 | C |
| ATOM   | 650 | CD2 | TYR | A | 89 | 11.327 | -0.036  | 36.740 | 1.00 | 29.22 | C |
| ATOM   | 651 | C   | TYR | A | 89 | 15.163 | 1.618   | 34.644 | 1.00 | 24.78 | C |
| ATOM   | 652 | O   | TYR | A | 89 | 16.314 | 1.670   | 35.077 | 1.00 | 23.35 | O |
| ATOM   | 653 | N   | LEU | A | 90 | 14.660 | 2.506   | 33.781 | 1.00 | 20.26 | N |

|      |     |     |     |   |    |        |        |        |      |       |   |
|------|-----|-----|-----|---|----|--------|--------|--------|------|-------|---|
| ATOM | 654 | CA  | LEU | A | 90 | 15.388 | 3.704  | 33.382 | 1.00 | 19.81 | C |
| ATOM | 655 | CB  | LEU | A | 90 | 15.638 | 3.740  | 31.861 | 1.00 | 23.23 | C |
| ATOM | 656 | CG  | LEU | A | 90 | 16.737 | 2.851  | 31.256 | 1.00 | 22.12 | C |
| ATOM | 657 | CD1 | LEU | A | 90 | 16.351 | 1.380  | 31.230 | 1.00 | 25.05 | C |
| ATOM | 658 | CD2 | LEU | A | 90 | 17.099 | 3.314  | 29.847 | 1.00 | 24.75 | C |
| ATOM | 659 | C   | LEU | A | 90 | 14.583 | 4.918  | 33.811 | 1.00 | 23.49 | C |
| ATOM | 660 | O   | LEU | A | 90 | 13.401 | 5.037  | 33.466 | 1.00 | 21.62 | O |
| ATOM | 661 | N   | VAL | A | 91 | 15.220 | 5.800  | 34.584 | 1.00 | 21.37 | N |
| ATOM | 662 | CA  | VAL | A | 91 | 14.587 | 7.053  | 35.009 | 1.00 | 19.47 | C |
| ATOM | 663 | CB  | VAL | A | 91 | 14.855 | 7.397  | 36.497 | 1.00 | 18.22 | C |
| ATOM | 664 | CG1 | VAL | A | 91 | 14.141 | 8.695  | 36.871 | 1.00 | 16.29 | C |
| ATOM | 665 | CG2 | VAL | A | 91 | 14.388 | 6.250  | 37.392 | 1.00 | 17.47 | C |
| ATOM | 666 | C   | VAL | A | 91 | 15.082 | 8.158  | 34.095 | 1.00 | 18.40 | C |
| ATOM | 667 | O   | VAL | A | 91 | 16.276 | 8.464  | 34.056 | 1.00 | 23.05 | O |
| ATOM | 668 | N   | MET | A | 92 | 14.143 | 8.737  | 33.349 | 1.00 | 18.85 | N |
| ATOM | 669 | CA  | MET | A | 92 | 14.483 | 9.632  | 32.246 | 1.00 | 20.29 | C |
| ATOM | 670 | CB  | MET | A | 92 | 14.198 | 8.942  | 30.894 | 1.00 | 22.37 | C |
| ATOM | 671 | CG  | MET | A | 92 | 14.402 | 7.433  | 30.884 | 1.00 | 33.35 | C |
| ATOM | 672 | SD  | MET | A | 92 | 14.342 | 6.689  | 29.252 | 1.00 | 31.47 | S |
| ATOM | 673 | CE  | MET | A | 92 | 15.787 | 7.443  | 28.537 | 1.00 | 24.77 | C |
| ATOM | 674 | C   | MET | A | 92 | 13.739 | 10.954 | 32.299 | 1.00 | 17.34 | C |
| ATOM | 675 | O   | MET | A | 92 | 12.703 | 11.105 | 32.964 | 1.00 | 19.77 | O |
| ATOM | 676 | N   | GLU | A | 93 | 14.292 | 11.904 | 31.557 | 1.00 | 17.63 | N |
| ATOM | 677 | CA  | GLU | A | 93 | 13.674 | 13.177 | 31.259 | 1.00 | 21.25 | C |
| ATOM | 678 | CB  | GLU | A | 93 | 14.506 | 13.854 | 30.171 | 1.00 | 21.84 | C |
| ATOM | 679 | CG  | GLU | A | 93 | 13.940 | 15.150 | 29.616 | 1.00 | 23.26 | C |
| ATOM | 680 | CD  | GLU | A | 93 | 14.897 | 15.838 | 28.669 | 1.00 | 24.67 | C |
| ATOM | 681 | OE1 | GLU | A | 93 | 14.768 | 17.064 | 28.510 | 1.00 | 31.87 | O |
| ATOM | 682 | OE2 | GLU | A | 93 | 15.782 | 15.162 | 28.098 | 1.00 | 22.67 | O |
| ATOM | 683 | C   | GLU | A | 93 | 12.237 | 12.948 | 30.804 | 1.00 | 19.03 | C |
| ATOM | 684 | O   | GLU | A | 93 | 11.985 | 12.085 | 29.945 | 1.00 | 20.45 | O |
| ATOM | 685 | N   | TYR | A | 94 | 11.310 | 13.680 | 31.425 | 1.00 | 18.70 | N |
| ATOM | 686 | CA  | TYR | A | 94 | 9.901  | 13.675 | 31.030 | 1.00 | 20.67 | C |
| ATOM | 687 | CB  | TYR | A | 94 | 8.985  | 14.027 | 32.211 | 1.00 | 18.57 | C |
| ATOM | 688 | CG  | TYR | A | 94 | 7.502  | 14.170 | 31.875 | 1.00 | 18.17 | C |
| ATOM | 689 | CD1 | TYR | A | 94 | 6.782  | 13.121 | 31.282 | 1.00 | 19.94 | C |
| ATOM | 690 | CE1 | TYR | A | 94 | 5.434  | 13.255 | 30.977 | 1.00 | 21.59 | C |
| ATOM | 691 | CZ  | TYR | A | 94 | 4.776  | 14.449 | 31.279 | 1.00 | 20.70 | C |
| ATOM | 692 | OH  | TYR | A | 94 | 3.440  | 14.583 | 30.985 | 1.00 | 24.11 | O |
| ATOM | 693 | CE2 | TYR | A | 94 | 5.460  | 15.494 | 31.875 | 1.00 | 20.35 | C |
| ATOM | 694 | CD2 | TYR | A | 94 | 6.815  | 15.356 | 32.164 | 1.00 | 20.77 | C |
| ATOM | 695 | C   | TYR | A | 94 | 9.694  | 14.651 | 29.871 | 1.00 | 21.16 | C |



|      |     |     |     |   |     |        |        |        |      |       |   |
|------|-----|-----|-----|---|-----|--------|--------|--------|------|-------|---|
| ATOM | 696 | O   | TYR | A | 94  | 10.127 | 15.803 | 29.931 | 1.00 | 19.98 | O |
| ATOM | 697 | N   | CYS | A | 95  | 9.063  | 14.151 | 28.808 | 1.00 | 20.88 | N |
| ATOM | 698 | CA  | CYS | A | 95  | 8.698  | 14.957 | 27.645 | 1.00 | 18.53 | C |
| ATOM | 699 | CB  | CYS | A | 95  | 9.251  | 14.314 | 26.359 | 1.00 | 18.47 | C |
| ATOM | 700 | SG  | CYS | A | 95  | 11.062 | 14.161 | 26.314 | 1.00 | 19.88 | S |
| ATOM | 701 | C   | CYS | A | 95  | 7.176  | 15.045 | 27.653 | 1.00 | 18.00 | C |
| ATOM | 702 | O   | CYS | A | 95  | 6.478  | 14.038 | 27.483 | 1.00 | 20.26 | O |
| ATOM | 703 | N   | ASN | A | 96  | 6.666  | 16.250 | 27.898 | 1.00 | 17.68 | N |
| ATOM | 704 | CA  | ASN | A | 96  | 5.235  | 16.454 | 28.193 | 1.00 | 17.12 | C |
| ATOM | 705 | CB  | ASN | A | 96  | 5.060  | 17.664 | 29.134 | 1.00 | 21.05 | C |
| ATOM | 706 | CG  | ASN | A | 96  | 5.560  | 18.969 | 28.527 | 1.00 | 26.75 | C |
| ATOM | 707 | OD1 | ASN | A | 96  | 5.709  | 19.100 | 27.315 | 1.00 | 28.08 | O |
| ATOM | 708 | ND2 | ASN | A | 96  | 5.825  | 19.945 | 29.380 | 1.00 | 30.98 | N |
| ATOM | 709 | C   | ASN | A | 96  | 4.318  | 16.630 | 26.976 | 1.00 | 17.95 | C |
| ATOM | 710 | O   | ASN | A | 96  | 3.114  | 16.854 | 27.132 | 1.00 | 20.31 | O |
| ATOM | 711 | N   | GLY | A | 97  | 4.888  | 16.555 | 25.776 | 1.00 | 19.65 | N |
| ATOM | 712 | CA  | GLY | A | 97  | 4.113  | 16.799 | 24.563 | 1.00 | 17.85 | C |
| ATOM | 713 | C   | GLY | A | 97  | 3.835  | 15.590 | 23.687 | 1.00 | 19.44 | C |
| ATOM | 714 | O   | GLY | A | 97  | 3.464  | 15.757 | 22.526 | 1.00 | 18.84 | O |
| ATOM | 715 | N   | GLY | A | 98  | 3.995  | 14.384 | 24.233 | 1.00 | 18.48 | N |
| ATOM | 716 | CA  | GLY | A | 98  | 3.720  | 13.156 | 23.484 | 1.00 | 16.70 | C |
| ATOM | 717 | C   | GLY | A | 98  | 4.814  | 12.907 | 22.464 | 1.00 | 15.26 | C |
| ATOM | 718 | O   | GLY | A | 98  | 5.955  | 13.337 | 22.639 | 1.00 | 16.87 | O |
| ATOM | 719 | N   | ASP | A | 99  | 4.478  | 12.216 | 21.383 | 1.00 | 13.87 | N |
| ATOM | 720 | CA  | ASP | A | 99  | 5.500  | 11.927 | 20.367 | 1.00 | 14.61 | C |
| ATOM | 721 | CB  | ASP | A | 99  | 5.825  | 10.431 | 20.316 | 1.00 | 15.67 | C |
| ATOM | 722 | CG  | ASP | A | 99  | 4.587  | 9.569  | 20.079 | 1.00 | 20.64 | C |
| ATOM | 723 | OD1 | ASP | A | 99  | 3.827  | 9.813  | 19.127 | 1.00 | 17.34 | O |
| ATOM | 724 | OD2 | ASP | A | 99  | 4.349  | 8.655  | 20.871 | 1.00 | 29.92 | O |
| ATOM | 725 | C   | ASP | A | 99  | 5.066  | 12.453 | 19.004 | 1.00 | 12.48 | C |
| ATOM | 726 | O   | ASP | A | 99  | 3.954  | 12.941 | 18.850 | 1.00 | 12.27 | O |
| ATOM | 727 | N   | LEU | A | 100 | 5.947  | 12.346 | 18.017 | 1.00 | 13.19 | N |
| ATOM | 728 | CA  | LEU | A | 100 | 5.615  | 12.808 | 16.661 | 1.00 | 11.89 | C |
| ATOM | 729 | CB  | LEU | A | 100 | 6.861  | 12.784 | 15.762 | 1.00 | 11.16 | C |
| ATOM | 730 | CG  | LEU | A | 100 | 6.777  | 13.393 | 14.354 | 1.00 | 11.14 | C |
| ATOM | 731 | CD1 | LEU | A | 100 | 6.312  | 14.848 | 14.407 | 1.00 | 9.63  | C |
| ATOM | 732 | CD2 | LEU | A | 100 | 8.140  | 13.304 | 13.671 | 1.00 | 11.20 | C |
| ATOM | 733 | C   | LEU | A | 100 | 4.449  | 12.041 | 16.016 | 1.00 | 10.72 | C |
| ATOM | 734 | O   | LEU | A | 100 | 3.668  | 12.631 | 15.252 | 1.00 | 12.40 | O |
| ATOM | 735 | N   | ALA | A | 101 | 4.312  | 10.751 | 16.331 | 1.00 | 10.97 | N |
| ATOM | 736 | CA  | ALA | A | 101 | 3.180  | 9.958  | 15.839 | 1.00 | 11.66 | C |
| ATOM | 737 | CB  | ALA | A | 101 | 3.300  | 8.497  | 16.273 | 1.00 | 14.73 | C |

|      |     |     |           |        |        |        |      |       |   |
|------|-----|-----|-----------|--------|--------|--------|------|-------|---|
| ATOM | 738 | C   | ALA A 101 | 1.838  | 10.556 | 16.278 | 1.00 | 13.50 | C |
| ATOM | 739 | O   | ALA A 101 | 0.921  | 10.710 | 15.445 | 1.00 | 12.67 | O |
| ATOM | 740 | N   | ASP A 102 | 1.728  | 10.916 | 17.563 | 1.00 | 10.76 | N |
| ATOM | 741 | CA  | ASP A 102 | 0.501  | 11.572 | 18.078 | 1.00 | 13.58 | C |
| ATOM | 742 | CB  | ASP A 102 | 0.601  | 11.943 | 19.567 | 1.00 | 15.71 | C |
| ATOM | 743 | CG  | ASP A 102 | 0.931  | 10.782 | 20.463 | 1.00 | 20.62 | C |
| ATOM | 744 | OD1 | ASP A 102 | 0.304  | 9.710  | 20.327 | 1.00 | 20.38 | O |
| ATOM | 745 | OD2 | ASP A 102 | 1.813  | 10.982 | 21.342 | 1.00 | 22.02 | O |
| ATOM | 746 | C   | ASP A 102 | 0.271  | 12.892 | 17.364 | 1.00 | 11.65 | C |
| ATOM | 747 | O   | ASP A 102 | -0.861 | 13.246 | 17.035 | 1.00 | 11.58 | O |
| ATOM | 748 | N   | TYR A 103 | 1.347  | 13.655 | 17.200 | 1.00 | 11.44 | N |
| ATOM | 749 | CA  | TYR A 103 | 1.267  | 14.998 | 16.648 | 1.00 | 11.71 | C |
| ATOM | 750 | CB  | TYR A 103 | 2.623  | 15.694 | 16.777 | 1.00 | 12.72 | C |
| ATOM | 751 | CG  | TYR A 103 | 2.587  | 17.197 | 16.607 | 1.00 | 15.23 | C |
| ATOM | 752 | CD1 | TYR A 103 | 1.822  | 18.005 | 17.466 | 1.00 | 19.84 | C |
| ATOM | 753 | CE1 | TYR A 103 | 1.792  | 19.388 | 17.307 | 1.00 | 20.49 | C |
| ATOM | 754 | CZ  | TYR A 103 | 2.541  | 19.977 | 16.299 | 1.00 | 19.69 | C |
| ATOM | 755 | OH  | TYR A 103 | 2.525  | 21.351 | 16.149 | 1.00 | 26.71 | O |
| ATOM | 756 | CE2 | TYR A 103 | 3.311  | 19.200 | 15.442 | 1.00 | 16.61 | C |
| ATOM | 757 | CD2 | TYR A 103 | 3.329  | 17.815 | 15.600 | 1.00 | 13.74 | C |
| ATOM | 758 | C   | TYR A 103 | 0.795  | 14.951 | 15.196 | 1.00 | 11.54 | C |
| ATOM | 759 | O   | TYR A 103 | -0.078 | 15.721 | 14.798 | 1.00 | 10.82 | O |
| ATOM | 760 | N   | LEU A 104 | 1.359  | 14.034 | 14.409 | 1.00 | 10.99 | N |
| ATOM | 761 | CA  | LEU A 104 | 0.945  | 13.888 | 13.012 | 1.00 | 9.49  | C |
| ATOM | 762 | CB  | LEU A 104 | 1.920  | 12.982 | 12.247 | 1.00 | 11.31 | C |
| ATOM | 763 | CG  | LEU A 104 | 3.323  | 13.547 | 12.060 | 1.00 | 13.09 | C |
| ATOM | 764 | CD1 | LEU A 104 | 4.194  | 12.549 | 11.303 | 1.00 | 13.17 | C |
| ATOM | 765 | CD2 | LEU A 104 | 3.292  | 14.880 | 11.325 | 1.00 | 16.05 | C |
| ATOM | 766 | C   | LEU A 104 | -0.472 | 13.367 | 12.879 | 1.00 | 10.94 | C |
| ATOM | 767 | O   | LEU A 104 | -1.214 | 13.804 | 11.989 | 1.00 | 12.50 | O |
| ATOM | 768 | N   | HIS A 105 | -0.864 | 12.439 | 13.746 | 1.00 | 10.20 | N |
| ATOM | 769 | CA  | HIS A 105 | -2.267 | 12.000 | 13.737 | 1.00 | 11.92 | C |
| ATOM | 770 | CB  | HIS A 105 | -2.537 | 10.886 | 14.752 | 1.00 | 11.14 | C |
| ATOM | 771 | CG  | HIS A 105 | -3.938 | 10.356 | 14.694 | 1.00 | 12.06 | C |
| ATOM | 772 | ND1 | HIS A 105 | -4.944 | 10.822 | 15.515 | 1.00 | 14.87 | N |
| ATOM | 773 | CE1 | HIS A 105 | -6.072 | 10.195 | 15.224 | 1.00 | 11.83 | C |
| ATOM | 774 | NE2 | HIS A 105 | -5.830 | 9.338  | 14.246 | 1.00 | 15.34 | N |
| ATOM | 775 | CD2 | HIS A 105 | -4.508 | 9.431  | 13.887 | 1.00 | 14.72 | C |
| ATOM | 776 | C   | HIS A 105 | -3.218 | 13.180 | 13.958 | 1.00 | 14.32 | C |
| ATOM | 777 | O   | HIS A 105 | -4.254 | 13.279 | 13.284 | 1.00 | 13.91 | O |
| ATOM | 778 | N   | ALA A 106 | -2.844 | 14.076 | 14.874 | 1.00 | 12.14 | N |
| ATOM | 779 | CA  | ALA A 106 | -3.683 | 15.228 | 15.243 | 1.00 | 13.15 | C |

|      |     |     |           |        |        |        |      |       |   |
|------|-----|-----|-----------|--------|--------|--------|------|-------|---|
| ATOM | 780 | CB  | ALA A 106 | -3.235 | 15.794 | 16.583 | 1.00 | 14.41 | C |
| ATOM | 781 | C   | ALA A 106 | -3.697 | 16.322 | 14.176 | 1.00 | 14.90 | C |
| ATOM | 782 | O   | ALA A 106 | -4.758 | 16.874 | 13.877 | 1.00 | 14.26 | O |
| ATOM | 783 | N   | MET A 107 | -2.524 | 16.619 | 13.608 | 1.00 | 11.82 | N |
| ATOM | 784 | CA  | MET A 107 | -2.343 | 17.748 | 12.679 | 1.00 | 10.94 | C |
| ATOM | 785 | CB  | MET A 107 | -0.942 | 18.364 | 12.829 | 1.00 | 14.04 | C |
| ATOM | 786 | CG  | MET A 107 | -0.534 | 18.864 | 14.208 | 1.00 | 18.66 | C |
| ATOM | 787 | SD  | MET A 107 | -1.540 | 20.275 | 14.697 | 1.00 | 26.22 | S |
| ATOM | 788 | CE  | MET A 107 | -2.775 | 19.483 | 15.713 | 1.00 | 30.14 | C |
| ATOM | 789 | C   | MET A 107 | -2.533 | 17.387 | 11.201 | 1.00 | 10.13 | C |
| ATOM | 790 | O   | MET A 107 | -2.760 | 18.281 | 10.370 | 1.00 | 10.92 | O |
| ATOM | 791 | N   | ARG A 108 | -2.379 | 16.094 | 10.896 | 1.00 | 10.50 | N |
| ATOM | 792 | CA  | ARG A 108 | -2.411 | 15.472 | 9.556  | 1.00 | 10.95 | C |
| ATOM | 793 | CB  | ARG A 108 | -3.690 | 15.789 | 8.743  | 1.00 | 13.57 | C |
| ATOM | 794 | CG  | ARG A 108 | -5.004 | 15.735 | 9.523  | 1.00 | 18.82 | C |
| ATOM | 795 | CD  | ARG A 108 | -5.246 | 14.416 | 10.248 | 1.00 | 21.74 | C |
| ATOM | 796 | NE  | ARG A 108 | -5.477 | 13.297 | 9.333  | 1.00 | 23.29 | N |
| ATOM | 797 | CZ  | ARG A 108 | -5.493 | 12.012 | 9.698  | 1.00 | 33.37 | C |
| ATOM | 798 | NH1 | ARG A 108 | -5.288 | 11.657 | 10.969 | 1.00 | 24.83 | N |
| ATOM | 799 | NH2 | ARG A 108 | -5.714 | 11.072 | 8.788  | 1.00 | 29.40 | N |
| ATOM | 800 | C   | ARG A 108 | -1.157 | 15.740 | 8.735  | 1.00 | 10.09 | C |
| ATOM | 801 | O   | ARG A 108 | -0.512 | 14.798 | 8.271  | 1.00 | 11.46 | O |
| ATOM | 802 | N   | THR A 109 | -0.823 | 17.018 | 8.561  | 1.00 | 9.12  | N |
| ATOM | 803 | CA  | THR A 109 | 0.423  | 17.430 | 7.901  | 1.00 | 10.24 | C |
| ATOM | 804 | CB  | THR A 109 | 0.236  | 17.817 | 6.412  | 1.00 | 9.43  | C |
| ATOM | 805 | OG1 | THR A 109 | -0.817 | 18.791 | 6.294  | 1.00 | 12.35 | O |
| ATOM | 806 | CG2 | THR A 109 | -0.056 | 16.611 | 5.551  | 1.00 | 9.55  | C |
| ATOM | 807 | C   | THR A 109 | 0.987  | 18.628 | 8.649  | 1.00 | 11.23 | C |
| ATOM | 808 | O   | THR A 109 | 0.252  | 19.335 | 9.357  | 1.00 | 11.58 | O |
| ATOM | 809 | N   | LEU A 110 | 2.288  | 18.844 | 8.491  | 1.00 | 9.54  | N |
| ATOM | 810 | CA  | LEU A 110 | 2.977  | 19.981 | 9.109  | 1.00 | 11.07 | C |
| ATOM | 811 | CB  | LEU A 110 | 4.191  | 19.503 | 9.924  | 1.00 | 10.90 | C |
| ATOM | 812 | CG  | LEU A 110 | 3.966  | 18.392 | 10.941 | 1.00 | 13.00 | C |
| ATOM | 813 | CD1 | LEU A 110 | 5.226  | 18.162 | 11.755 | 1.00 | 12.45 | C |
| ATOM | 814 | CD2 | LEU A 110 | 2.798  | 18.699 | 11.873 | 1.00 | 16.16 | C |
| ATOM | 815 | C   | LEU A 110 | 3.449  | 20.968 | 8.067  | 1.00 | 10.45 | C |
| ATOM | 816 | O   | LEU A 110 | 3.790  | 20.564 | 6.946  | 1.00 | 10.19 | O |
| ATOM | 817 | N   | SER A 111 | 3.498  | 22.256 | 8.441  | 1.00 | 9.78  | N |
| ATOM | 818 | CA  | SER A 111 | 4.061  | 23.291 | 7.554  | 1.00 | 9.76  | C |
| ATOM | 819 | CB  | SER A 111 | 3.863  | 24.697 | 8.115  | 1.00 | 11.51 | C |
| ATOM | 820 | OG  | SER A 111 | 4.643  | 24.886 | 9.292  | 1.00 | 11.38 | O |
| ATOM | 821 | C   | SER A 111 | 5.551  | 23.027 | 7.359  | 1.00 | 9.62  | C |

|      |     |     |            |        |        |        |      |       |   |
|------|-----|-----|------------|--------|--------|--------|------|-------|---|
| ATOM | 822 | O   | SER A 111  | 6.181  | 22.409 | 8.220  | 1.00 | 10.12 | O |
| ATOM | 823 | N   | GLU A 112  | 6.101  | 23.497 | 6.242  | 1.00 | 10.30 | N |
| ATOM | 824 | CA  | GLU A 112  | 7.559  | 23.360 | 6.016  | 1.00 | 10.42 | C |
| ATOM | 825 | CB  | GLU A 112  | 7.973  | 23.901 | 4.647  | 1.00 | 11.27 | C |
| ATOM | 826 | CG  | GLU A 112  | 7.359  | 23.154 | 3.473  | 1.00 | 10.23 | C |
| ATOM | 827 | CD  | GLU A 112  | 8.127  | 23.343 | 2.175  | 1.00 | 12.17 | C |
| ATOM | 828 | OE1 | GLU A 112  | 9.261  | 23.861 | 2.204  | 1.00 | 13.65 | O |
| ATOM | 829 | OE2 | GLU A 112  | 7.596  | 22.961 | 1.120  | 1.00 | 11.07 | O |
| ATOM | 830 | C   | GLU A 112  | 8.357  | 24.049 | 7.121  | 1.00 | 10.77 | C |
| ATOM | 831 | O   | GLU A 112  | 9.398  | 23.554 | 7.508  | 1.00 | 10.26 | O |
| ATOM | 832 | N   | ASP A 113  | 7.852  | 25.167 | 7.652  | 1.00 | 11.96 | N |
| ATOM | 833 | CA  | ASP A 113  | 8.519  | 25.850 | 8.778  | 1.00 | 12.73 | C |
| ATOM | 834 | CB  | ASP A 113  | 7.841  | 27.198 | 9.075  | 1.00 | 13.42 | C |
| ATOM | 835 | CG  | ASP A 113  | 8.564  | 28.001 | 10.153 | 1.00 | 20.33 | C |
| ATOM | 836 | OD1 | ASP A 113  | 9.669  | 28.519 | 9.873  | 1.00 | 27.78 | O |
| ATOM | 837 | OD2 | ASP A 113  | 8.025  | 28.120 | 11.282 | 1.00 | 25.05 | O |
| ATOM | 838 | C   | ASP A 113  | 8.594  | 24.982 | 10.045 | 1.00 | 11.73 | C |
| ATOM | 839 | O   | ASP A 113  | 9.643  | 24.920 | 10.689 | 1.00 | 10.60 | O |
| ATOM | 840 | N   | THR A 114  | 7.489  | 24.321 | 10.404 | 1.00 | 9.97  | N |
| ATOM | 841 | CA  | THR A 114  | 7.479  | 23.371 | 11.534 | 1.00 | 10.51 | C |
| ATOM | 842 | CB  | THR A 114  | 6.053  | 22.853 | 11.836 | 1.00 | 11.60 | C |
| ATOM | 843 | OG1 | THR A 114  | 5.256  | 23.939 | 12.329 | 1.00 | 14.71 | O |
| ATOM | 844 | CG2 | THR A 114  | 6.051  | 21.743 | 12.873 | 1.00 | 12.85 | C |
| ATOM | 845 | C   | THR A 114  | 8.450  | 22.216 | 11.266 | 1.00 | 11.28 | C |
| ATOM | 846 | O   | THR A 114  | 9.205  | 21.815 | 12.159 | 1.00 | 9.81  | O |
| ATOM | 847 | N   | ILE A 115  | 8.439  | 21.701 | 10.031 | 1.00 | 8.82  | N |
| ATOM | 848 | CA  | ILE A 115  | 9.347  | 20.601 | 9.665  | 1.00 | 9.26  | C |
| ATOM | 849 | CB  | ILE A 115  | 9.090  | 20.076 | 8.231  | 1.00 | 9.36  | C |
| ATOM | 850 | CG1 | ILE A 115  | 7.680  | 19.457 | 8.147  | 1.00 | 11.37 | C |
| ATOM | 851 | CD1 | ILE A 115  | 7.230  | 19.078 | 6.743  | 1.00 | 9.96  | C |
| ATOM | 852 | CG2 | ILE A 115  | 10.171 | 19.075 | 7.802  | 1.00 | 10.09 | C |
| ATOM | 853 | C   | ILE A 115  | 10.803 | 21.038 | 9.864  | 1.00 | 10.07 | C |
| ATOM | 854 | O   | ILE A 115  | 11.596 | 20.282 | 10.444 | 1.00 | 11.75 | O |
| ATOM | 855 | N   | ARG A 116  | 11.123 | 22.256 | 9.407  | 1.00 | 10.07 | N |
| ATOM | 856 | CA  | AARG A 116 | 12.474 | 22.818 | 9.565  | 0.50 | 11.89 | C |
| ATOM | 857 | CA  | BARG A 116 | 12.465 | 22.830 | 9.559  | 0.50 | 12.72 | C |
| ATOM | 858 | CB  | AARG A 116 | 12.580 | 24.192 | 8.898  | 0.50 | 12.23 | C |
| ATOM | 859 | CB  | BARG A 116 | 12.515 | 24.214 | 8.905  | 0.50 | 14.47 | C |
| ATOM | 860 | CG  | AARG A 116 | 13.910 | 24.913 | 9.111  | 0.50 | 14.35 | C |
| ATOM | 861 | CG  | BARG A 116 | 13.872 | 24.900 | 8.944  | 0.50 | 19.64 | C |
| ATOM | 862 | CD  | AARG A 116 | 13.901 | 26.189 | 8.301  | 0.50 | 18.72 | C |
| ATOM | 863 | CD  | BARG A 116 | 13.735 | 26.339 | 8.481  | 0.50 | 26.81 | C |

|      |     |      |      |   |     |        |        |        |      |       |   |
|------|-----|------|------|---|-----|--------|--------|--------|------|-------|---|
| ATOM | 864 | NE   | AARG | A | 116 | 13.037 | 26.020 | 7.144  | 0.50 | 20.46 | N |
| ATOM | 865 | NE   | BARG | A | 116 | 12.665 | 26.511 | 7.501  | 0.50 | 32.43 | N |
| ATOM | 866 | CZ   | AARG | A | 116 | 11.854 | 26.613 | 7.009  | 0.50 | 17.53 | C |
| ATOM | 867 | CZ   | BARG | A | 116 | 12.813 | 26.378 | 6.185  | 0.50 | 29.41 | C |
| ATOM | 868 | NH1A | AARG | A | 116 | 11.425 | 27.453 | 7.940  | 0.50 | 13.63 | N |
| ATOM | 869 | NH1B | AARG | A | 116 | 13.992 | 26.067 | 5.667  | 0.50 | 20.17 | N |
| ATOM | 870 | NH2A | AARG | A | 116 | 11.119 | 26.375 | 5.938  | 0.50 | 16.47 | N |
| ATOM | 871 | NH2B | AARG | A | 116 | 11.773 | 26.550 | 5.385  | 0.50 | 30.55 | N |
| ATOM | 872 | C    | ARG  | A | 116 | 12.870 | 22.904 | 11.036 | 1.00 | 12.30 | C |
| ATOM | 873 | O    | ARG  | A | 116 | 13.977 | 22.521 | 11.394 | 1.00 | 14.39 | O |
| ATOM | 874 | N    | LEU  | A | 117 | 11.953 | 23.401 | 11.871 | 1.00 | 12.06 | N |
| ATOM | 875 | CA   | LEU  | A | 117 | 12.185 | 23.542 | 13.315 | 1.00 | 12.71 | C |
| ATOM | 876 | CB   | LEU  | A | 117 | 10.990 | 24.227 | 14.007 | 1.00 | 16.67 | C |
| ATOM | 877 | CG   | LEU  | A | 117 | 10.915 | 25.759 | 13.874 | 1.00 | 25.02 | C |
| ATOM | 878 | CD1  | LEU  | A | 117 | 9.504  | 26.303 | 14.064 | 1.00 | 25.22 | C |
| ATOM | 879 | CD2  | LEU  | A | 117 | 11.873 | 26.426 | 14.862 | 1.00 | 30.48 | C |
| ATOM | 880 | C    | LEU  | A | 117 | 12.524 | 22.206 | 13.971 | 1.00 | 14.23 | C |
| ATOM | 881 | O    | LEU  | A | 117 | 13.496 | 22.114 | 14.717 | 1.00 | 15.36 | O |
| ATOM | 882 | N    | PHE  | A | 118 | 11.756 | 21.165 | 13.645 | 1.00 | 12.90 | N |
| ATOM | 883 | CA   | PHE  | A | 118 | 11.965 | 19.833 | 14.233 | 1.00 | 13.17 | C |
| ATOM | 884 | CB   | PHE  | A | 118 | 10.766 | 18.919 | 13.912 | 1.00 | 11.95 | C |
| ATOM | 885 | CG   | PHE  | A | 118 | 9.495  | 19.232 | 14.678 | 1.00 | 13.39 | C |
| ATOM | 886 | CD1  | PHE  | A | 118 | 9.395  | 20.317 | 15.559 | 1.00 | 14.24 | C |
| ATOM | 887 | CE1  | PHE  | A | 118 | 8.206  | 20.576 | 16.248 | 1.00 | 14.19 | C |
| ATOM | 888 | CZ   | PHE  | A | 118 | 7.100  | 19.758 | 16.059 | 1.00 | 12.92 | C |
| ATOM | 889 | CE2  | PHE  | A | 118 | 7.172  | 18.680 | 15.174 | 1.00 | 14.20 | C |
| ATOM | 890 | CD2  | PHE  | A | 118 | 8.364  | 18.417 | 14.494 | 1.00 | 13.22 | C |
| ATOM | 891 | C    | PHE  | A | 118 | 13.242 | 19.201 | 13.680 | 1.00 | 13.69 | C |
| ATOM | 892 | O    | PHE  | A | 118 | 13.997 | 18.544 | 14.406 | 1.00 | 13.92 | O |
| ATOM | 893 | N    | LEU  | A | 119 | 13.474 | 19.399 | 12.386 | 1.00 | 11.82 | N |
| ATOM | 894 | CA   | LEU  | A | 119 | 14.587 | 18.756 | 11.703 | 1.00 | 11.53 | C |
| ATOM | 895 | CB   | LEU  | A | 119 | 14.388 | 18.795 | 10.183 | 1.00 | 11.56 | C |
| ATOM | 896 | CG   | LEU  | A | 119 | 15.361 | 18.013 | 9.298  | 1.00 | 12.48 | C |
| ATOM | 897 | CD1  | LEU  | A | 119 | 15.377 | 16.541 | 9.696  | 1.00 | 10.09 | C |
| ATOM | 898 | CD2  | LEU  | A | 119 | 14.952 | 18.181 | 7.833  | 1.00 | 11.29 | C |
| ATOM | 899 | C    | LEU  | A | 119 | 15.936 | 19.352 | 12.117 | 1.00 | 11.66 | C |
| ATOM | 900 | O    | LEU  | A | 119 | 16.928 | 18.617 | 12.231 | 1.00 | 13.29 | O |
| ATOM | 901 | N    | GLN  | A | 120 | 15.971 | 20.664 | 12.366 | 1.00 | 12.88 | N |
| ATOM | 902 | CA   | GLN  | A | 120 | 17.191 | 21.306 | 12.929 | 1.00 | 14.29 | C |
| ATOM | 903 | CB   | GLN  | A | 120 | 16.957 | 22.795 | 13.217 | 1.00 | 19.42 | C |
| ATOM | 904 | CG   | GLN  | A | 120 | 16.831 | 23.675 | 11.982 | 1.00 | 24.38 | C |
| ATOM | 905 | CD   | GLN  | A | 120 | 16.472 | 25.127 | 12.300 | 1.00 | 29.68 | C |

|      |     |     |      |   |     |        |        |        |      |       |   |
|------|-----|-----|------|---|-----|--------|--------|--------|------|-------|---|
| ATOM | 906 | OE1 | GLN  | A | 120 | 15.654 | 25.410 | 13.180 | 1.00 | 30.92 | O |
| ATOM | 907 | NE2 | GLN  | A | 120 | 17.073 | 26.052 | 11.565 | 1.00 | 32.91 | N |
| ATOM | 908 | C   | GLN  | A | 120 | 17.610 | 20.626 | 14.232 | 1.00 | 14.31 | C |
| ATOM | 909 | O   | GLN  | A | 120 | 18.801 | 20.343 | 14.452 | 1.00 | 14.20 | O |
| ATOM | 910 | N   | GLN  | A | 121 | 16.616 | 20.360 | 15.081 | 1.00 | 15.40 | N |
| ATOM | 911 | CA  | GLN  | A | 121 | 16.830 | 19.729 | 16.385 | 1.00 | 16.35 | C |
| ATOM | 912 | CB  | GLN  | A | 121 | 15.569 | 19.847 | 17.248 | 1.00 | 18.55 | C |
| ATOM | 913 | CG  | GLN  | A | 121 | 15.198 | 21.281 | 17.615 | 1.00 | 18.52 | C |
| ATOM | 914 | CD  | GLN  | A | 121 | 13.973 | 21.356 | 18.498 | 1.00 | 18.73 | C |
| ATOM | 915 | OE1 | GLN  | A | 121 | 14.008 | 20.951 | 19.652 | 1.00 | 25.77 | O |
| ATOM | 916 | NE2 | GLN  | A | 121 | 12.876 | 21.872 | 17.952 | 1.00 | 19.74 | N |
| ATOM | 917 | C   | GLN  | A | 121 | 17.291 | 18.277 | 16.232 | 1.00 | 18.17 | C |
| ATOM | 918 | O   | GLN  | A | 121 | 18.292 | 17.866 | 16.845 | 1.00 | 19.63 | O |
| ATOM | 919 | N   | ILE  | A | 122 | 16.581 | 17.504 | 15.406 | 1.00 | 15.15 | N |
| ATOM | 920 | CA  | ILE  | A | 122 | 17.030 | 16.155 | 15.026 | 1.00 | 14.82 | C |
| ATOM | 921 | CB  | ILE  | A | 122 | 16.080 | 15.514 | 13.977 | 1.00 | 14.11 | C |
| ATOM | 922 | CG1 | ILE  | A | 122 | 14.714 | 15.222 | 14.606 | 1.00 | 16.00 | C |
| ATOM | 923 | CD1 | ILE  | A | 122 | 13.584 | 14.991 | 13.604 | 1.00 | 17.09 | C |
| ATOM | 924 | CG2 | ILE  | A | 122 | 16.698 | 14.241 | 13.401 | 1.00 | 13.39 | C |
| ATOM | 925 | C   | ILE  | A | 122 | 18.487 | 16.166 | 14.526 | 1.00 | 15.00 | C |
| ATOM | 926 | O   | ILE  | A | 122 | 19.302 | 15.336 | 14.963 | 1.00 | 17.68 | O |
| ATOM | 927 | N   | ALA  | A | 123 | 18.814 | 17.117 | 13.648 | 1.00 | 14.68 | N |
| ATOM | 928 | CA  | ALA  | A | 123 | 20.156 | 17.226 | 13.055 | 1.00 | 14.71 | C |
| ATOM | 929 | CB  | ALA  | A | 123 | 20.188 | 18.327 | 12.010 | 1.00 | 16.01 | C |
| ATOM | 930 | C   | ALA  | A | 123 | 21.265 | 17.447 | 14.097 | 1.00 | 15.27 | C |
| ATOM | 931 | O   | ALA  | A | 123 | 22.355 | 16.893 | 13.960 | 1.00 | 16.90 | O |
| ATOM | 932 | N   | GLY  | A | 124 | 20.968 | 18.254 | 15.116 | 1.00 | 16.90 | N |
| ATOM | 933 | CA  | GLY  | A | 124 | 21.879 | 18.471 | 16.256 | 1.00 | 18.07 | C |
| ATOM | 934 | C   | GLY  | A | 124 | 22.182 | 17.198 | 17.036 | 1.00 | 21.24 | C |
| ATOM | 935 | O   | GLY  | A | 124 | 23.345 | 16.897 | 17.306 | 1.00 | 19.44 | O |
| ATOM | 936 | N   | ALA  | A | 125 | 21.132 | 16.450 | 17.385 | 1.00 | 18.55 | N |
| ATOM | 937 | CA  | ALA  | A | 125 | 21.275 | 15.138 | 18.019 | 1.00 | 18.17 | C |
| ATOM | 938 | CB  | ALA  | A | 125 | 19.904 | 14.557 | 18.337 | 1.00 | 18.65 | C |
| ATOM | 939 | C   | ALA  | A | 125 | 22.090 | 14.170 | 17.149 | 1.00 | 18.28 | C |
| ATOM | 940 | O   | ALA  | A | 125 | 23.017 | 13.509 | 17.638 | 1.00 | 16.27 | O |
| ATOM | 941 | N   | MET  | A | 126 | 21.765 | 14.125 | 15.855 | 1.00 | 14.82 | N |
| ATOM | 942 | CA  | AMET | A | 126 | 22.424 | 13.224 | 14.904 | 0.50 | 14.62 | C |
| ATOM | 943 | CA  | BMET | A | 126 | 22.430 | 13.209 | 14.929 | 0.50 | 15.69 | C |
| ATOM | 944 | CB  | AMET | A | 126 | 21.699 | 13.241 | 13.553 | 0.50 | 15.60 | C |
| ATOM | 945 | CB  | BMET | A | 126 | 21.661 | 13.117 | 13.604 | 0.50 | 19.78 | C |
| ATOM | 946 | CG  | AMET | A | 126 | 20.322 | 12.591 | 13.569 | 0.50 | 14.86 | C |
| ATOM | 947 | CG  | BMET | A | 126 | 20.309 | 12.428 | 13.754 | 0.50 | 20.52 | C |

|      |     |     |      |       |        |        |        |      |       |   |
|------|-----|-----|------|-------|--------|--------|--------|------|-------|---|
| ATOM | 948 | SD  | AMET | A 126 | 20.314 | 10.872 | 14.119 | 0.50 | 14.67 | S |
| ATOM | 949 | SD  | BMET | A 126 | 19.437 | 12.161 | 12.201 | 0.50 | 26.10 | S |
| ATOM | 950 | CE  | AMET | A 126 | 19.905 | 11.024 | 15.838 | 0.50 | 18.48 | C |
| ATOM | 951 | CE  | BMET | A 126 | 20.559 | 11.016 | 11.412 | 0.50 | 26.17 | C |
| ATOM | 952 | C   | MET  | A 126 | 23.903 | 13.570 | 14.717 | 1.00 | 16.53 | C |
| ATOM | 953 | O   | MET  | A 126 | 24.732 | 12.678 | 14.484 | 1.00 | 17.11 | O |
| ATOM | 954 | N   | ARG  | A 127 | 24.232 | 14.864 | 14.831 | 1.00 | 18.82 | N |
| ATOM | 955 | CA  | ARG  | A 127 | 25.634 | 15.293 | 14.736 | 1.00 | 20.38 | C |
| ATOM | 956 | CB  | ARG  | A 127 | 25.807 | 16.820 | 14.754 | 1.00 | 25.12 | C |
| ATOM | 957 | CG  | ARG  | A 127 | 27.242 | 17.237 | 14.408 | 1.00 | 30.23 | C |
| ATOM | 958 | CD  | ARG  | A 127 | 27.444 | 18.743 | 14.299 | 1.00 | 37.45 | C |
| ATOM | 959 | NE  | ARG  | A 127 | 27.001 | 19.467 | 15.493 | 1.00 | 44.13 | N |
| ATOM | 960 | CZ  | ARG  | A 127 | 27.199 | 20.764 | 15.723 | 1.00 | 47.14 | C |
| ATOM | 961 | NH1 | ARG  | A 127 | 27.850 | 21.523 | 14.849 | 1.00 | 49.34 | N |
| ATOM | 962 | NH2 | ARG  | A 127 | 26.738 | 21.309 | 16.840 | 1.00 | 49.27 | N |
| ATOM | 963 | C   | ARG  | A 127 | 26.484 | 14.617 | 15.818 | 1.00 | 21.06 | C |
| ATOM | 964 | O   | ARG  | A 127 | 27.571 | 14.120 | 15.517 | 1.00 | 21.58 | O |
| ATOM | 965 | N   | LEU  | A 128 | 25.964 | 14.575 | 17.046 | 1.00 | 20.30 | N |
| ATOM | 966 | CA  | LEU  | A 128 | 26.619 | 13.855 | 18.150 | 1.00 | 21.57 | C |
| ATOM | 967 | CB  | LEU  | A 128 | 25.947 | 14.158 | 19.492 | 1.00 | 22.63 | C |
| ATOM | 968 | CG  | LEU  | A 128 | 26.546 | 13.539 | 20.769 | 1.00 | 24.68 | C |
| ATOM | 969 | CD1 | LEU  | A 128 | 27.930 | 14.098 | 21.088 | 1.00 | 30.71 | C |
| ATOM | 970 | CD2 | LEU  | A 128 | 25.604 | 13.768 | 21.940 | 1.00 | 25.91 | C |
| ATOM | 971 | C   | LEU  | A 128 | 26.744 | 12.347 | 17.925 | 1.00 | 25.54 | C |
| ATOM | 972 | O   | LEU  | A 128 | 27.810 | 11.780 | 18.189 | 1.00 | 24.64 | O |
| ATOM | 973 | N   | LEU  | A 129 | 25.673 | 11.700 | 17.442 | 1.00 | 19.41 | N |
| ATOM | 974 | CA  | LEU  | A 129 | 25.730 | 10.272 | 17.110 | 1.00 | 20.44 | C |
| ATOM | 975 | CB  | LEU  | A 129 | 24.376 | 9.734  | 16.598 | 1.00 | 19.97 | C |
| ATOM | 976 | CG  | LEU  | A 129 | 23.055 | 9.751  | 17.385 | 1.00 | 28.42 | C |
| ATOM | 977 | CD1 | LEU  | A 129 | 22.240 | 8.519  | 17.005 | 1.00 | 30.87 | C |
| ATOM | 978 | CD2 | LEU  | A 129 | 23.202 | 9.808  | 18.891 | 1.00 | 30.57 | C |
| ATOM | 979 | C   | LEU  | A 129 | 26.820 | 9.992  | 16.076 | 1.00 | 19.34 | C |
| ATOM | 980 | O   | LEU  | A 129 | 27.607 | 9.059  | 16.239 | 1.00 | 21.54 | O |
| ATOM | 981 | N   | HIS  | A 130 | 26.845 | 10.811 | 15.025 | 1.00 | 18.09 | N |
| ATOM | 982 | CA  | HIS  | A 130 | 27.829 | 10.710 | 13.950 | 1.00 | 19.78 | C |
| ATOM | 983 | CB  | HIS  | A 130 | 27.570 | 11.753 | 12.861 | 1.00 | 17.88 | C |
| ATOM | 984 | CG  | HIS  | A 130 | 28.472 | 11.622 | 11.671 | 1.00 | 21.70 | C |
| ATOM | 985 | ND1 | HIS  | A 130 | 29.487 | 12.517 | 11.405 | 1.00 | 25.49 | N |
| ATOM | 986 | CE1 | HIS  | A 130 | 30.116 | 12.152 | 10.303 | 1.00 | 23.84 | C |
| ATOM | 987 | NE2 | HIS  | A 130 | 29.550 | 11.052 | 9.847  | 1.00 | 24.33 | N |
| ATOM | 988 | CD2 | HIS  | A 130 | 28.523 | 10.696 | 10.687 | 1.00 | 17.75 | C |
| ATOM | 989 | C   | HIS  | A 130 | 29.261 | 10.821 | 14.471 | 1.00 | 19.47 | C |

|      |      |     |            |        |        |        |      |       |   |
|------|------|-----|------------|--------|--------|--------|------|-------|---|
| ATOM | 990  | O   | HIS A 130  | 30.116 | 10.024 | 14.088 | 1.00 | 22.97 | O |
| ATOM | 991  | N   | SER A 131  | 29.506 | 11.793 | 15.347 | 1.00 | 19.76 | N |
| ATOM | 992  | CA  | SER A 131  | 30.850 | 11.984 | 15.914 | 1.00 | 26.23 | C |
| ATOM | 993  | CB  | SER A 131  | 30.935 | 13.283 | 16.719 | 1.00 | 29.65 | C |
| ATOM | 994  | OG  | SER A 131  | 30.141 | 13.226 | 17.886 | 1.00 | 40.72 | O |
| ATOM | 995  | C   | SER A 131  | 31.296 | 10.783 | 16.754 | 1.00 | 27.74 | C |
| ATOM | 996  | O   | SER A 131  | 32.462 | 10.391 | 16.695 | 1.00 | 27.11 | O |
| ATOM | 997  | N   | LYS A 132  | 30.359 | 10.192 | 17.497 | 1.00 | 24.55 | N |
| ATOM | 998  | CA  | LYS A 132  | 30.626 | 9.015  | 18.348 | 1.00 | 25.47 | C |
| ATOM | 999  | CB  | LYS A 132  | 29.635 | 8.961  | 19.514 | 1.00 | 28.34 | C |
| ATOM | 1000 | CG  | LYS A 132  | 29.888 | 9.997  | 20.598 | 1.00 | 36.58 | C |
| ATOM | 1001 | CD  | LYS A 132  | 29.386 | 9.514  | 21.948 | 1.00 | 42.11 | C |
| ATOM | 1002 | CE  | LYS A 132  | 30.203 | 10.102 | 23.090 | 1.00 | 55.60 | C |
| ATOM | 1003 | NZ  | LYS A 132  | 29.887 | 11.533 | 23.372 | 1.00 | 52.50 | N |
| ATOM | 1004 | C   | LYS A 132  | 30.643 | 7.673  | 17.598 | 1.00 | 30.64 | C |
| ATOM | 1005 | O   | LYS A 132  | 31.002 | 6.634  | 18.182 | 1.00 | 32.89 | O |
| ATOM | 1006 | N   | GLY A 133  | 30.265 | 7.702  | 16.314 | 1.00 | 25.14 | N |
| ATOM | 1007 | CA  | GLY A 133  | 30.126 | 6.505  | 15.479 | 1.00 | 26.20 | C |
| ATOM | 1008 | C   | GLY A 133  | 28.965 | 5.606  | 15.876 | 1.00 | 26.29 | C |
| ATOM | 1009 | O   | GLY A 133  | 29.096 | 4.380  | 15.838 | 1.00 | 26.82 | O |
| ATOM | 1010 | N   | ILE A 134  | 27.832 | 6.214  | 16.242 | 1.00 | 21.38 | N |
| ATOM | 1011 | CA  | ILE A 134  | 26.628 | 5.483  | 16.675 | 1.00 | 20.75 | C |
| ATOM | 1012 | CB  | ILE A 134  | 26.111 | 5.983  | 18.059 | 1.00 | 21.63 | C |
| ATOM | 1013 | CG1 | ILE A 134  | 27.139 | 5.697  | 19.167 | 1.00 | 23.69 | C |
| ATOM | 1014 | CD1 | ILE A 134  | 26.908 | 6.503  | 20.435 | 1.00 | 25.83 | C |
| ATOM | 1015 | CG2 | ILE A 134  | 24.763 | 5.362  | 18.430 | 1.00 | 20.01 | C |
| ATOM | 1016 | C   | ILE A 134  | 25.513 | 5.604  | 15.634 | 1.00 | 21.27 | C |
| ATOM | 1017 | O   | ILE A 134  | 25.227 | 6.710  | 15.173 | 1.00 | 24.16 | O |
| ATOM | 1018 | N   | ILE A 135  | 24.912 | 4.461  | 15.280 | 1.00 | 19.31 | N |
| ATOM | 1019 | CA  | AILE A 135 | 23.722 | 4.431  | 14.424 | 0.70 | 21.89 | C |
| ATOM | 1020 | CA  | BILE A 135 | 23.726 | 4.405  | 14.407 | 0.30 | 18.25 | C |
| ATOM | 1021 | CB  | AILE A 135 | 23.908 | 3.563  | 13.146 | 0.70 | 22.57 | C |
| ATOM | 1022 | CB  | BILE A 135 | 23.895 | 3.420  | 13.214 | 0.30 | 16.61 | C |
| ATOM | 1023 | CG1 | AILE A 135 | 22.632 | 3.582  | 12.286 | 0.70 | 23.48 | C |
| ATOM | 1024 | CG1 | BILE A 135 | 25.226 | 3.629  | 12.477 | 0.30 | 14.88 | C |
| ATOM | 1025 | CD1 | AILE A 135 | 22.625 | 2.656  | 11.096 | 0.70 | 26.14 | C |
| ATOM | 1026 | CD1 | BILE A 135 | 26.230 | 2.522  | 12.700 | 0.30 | 17.06 | C |
| ATOM | 1027 | CG2 | AILE A 135 | 24.389 | 2.155  | 13.478 | 0.70 | 27.49 | C |
| ATOM | 1028 | CG2 | BILE A 135 | 22.755 | 3.555  | 12.211 | 0.30 | 16.10 | C |
| ATOM | 1029 | C   | ILE A 135  | 22.523 | 4.005  | 15.270 | 1.00 | 18.44 | C |
| ATOM | 1030 | O   | ILE A 135  | 22.587 | 3.022  | 16.014 | 1.00 | 19.01 | O |
| ATOM | 1031 | N   | HIS A 136  | 21.443 | 4.779  | 15.187 | 1.00 | 16.08 | N |



|      |      |     |           |        |        |        |      |       |   |
|------|------|-----|-----------|--------|--------|--------|------|-------|---|
| ATOM | 1032 | CA  | HIS A 136 | 20.265 | 4.541  | 16.015 | 1.00 | 15.06 | C |
| ATOM | 1033 | CB  | HIS A 136 | 19.356 | 5.790  | 16.002 | 1.00 | 14.40 | C |
| ATOM | 1034 | CG  | HIS A 136 | 18.153 | 5.695  | 16.893 | 1.00 | 13.76 | C |
| ATOM | 1035 | ND1 | HIS A 136 | 17.090 | 4.854  | 16.625 | 1.00 | 13.10 | N |
| ATOM | 1036 | CE1 | HIS A 136 | 16.169 | 5.000  | 17.560 | 1.00 | 13.79 | C |
| ATOM | 1037 | NE2 | HIS A 136 | 16.591 | 5.908  | 18.421 | 1.00 | 12.25 | N |
| ATOM | 1038 | CD2 | HIS A 136 | 17.830 | 6.357  | 18.031 | 1.00 | 12.62 | C |
| ATOM | 1039 | C   | HIS A 136 | 19.527 | 3.279  | 15.565 | 1.00 | 14.85 | C |
| ATOM | 1040 | O   | HIS A 136 | 19.184 | 2.444  | 16.399 | 1.00 | 15.51 | O |
| ATOM | 1041 | N   | ARG A 137 | 19.278 | 3.176  | 14.251 | 1.00 | 14.20 | N |
| ATOM | 1042 | CA  | ARG A 137 | 18.700 | 1.990  | 13.558 | 1.00 | 15.59 | C |
| ATOM | 1043 | CB  | ARG A 137 | 19.401 | 0.664  | 13.952 | 1.00 | 15.49 | C |
| ATOM | 1044 | CG  | ARG A 137 | 20.904 | 0.623  | 13.728 | 1.00 | 20.54 | C |
| ATOM | 1045 | CD  | ARG A 137 | 21.411 | -0.807 | 13.672 | 1.00 | 19.82 | C |
| ATOM | 1046 | NE  | ARG A 137 | 21.191 | -1.535 | 14.927 | 1.00 | 23.94 | N |
| ATOM | 1047 | CZ  | ARG A 137 | 21.051 | -2.858 | 15.026 | 1.00 | 25.52 | C |
| ATOM | 1048 | NH1 | ARG A 137 | 20.854 | -3.411 | 16.216 | 1.00 | 22.05 | N |
| ATOM | 1049 | NH2 | ARG A 137 | 21.105 | -3.631 | 13.943 | 1.00 | 23.87 | N |
| ATOM | 1050 | C   | ARG A 137 | 17.184 | 1.817  | 13.668 | 1.00 | 16.52 | C |
| ATOM | 1051 | O   | ARG A 137 | 16.610 | 0.986  | 12.955 | 1.00 | 17.31 | O |
| ATOM | 1052 | N   | ASP A 138 | 16.537 | 2.596  | 14.536 | 1.00 | 13.10 | N |
| ATOM | 1053 | CA  | ASP A 138 | 15.105 | 2.438  | 14.790 | 1.00 | 14.10 | C |
| ATOM | 1054 | CB  | ASP A 138 | 14.911 | 1.598  | 16.075 | 1.00 | 15.79 | C |
| ATOM | 1055 | CG  | ASP A 138 | 13.461 | 1.137  | 16.302 | 1.00 | 20.83 | C |
| ATOM | 1056 | OD1 | ASP A 138 | 12.723 | 0.822  | 15.348 | 1.00 | 16.76 | O |
| ATOM | 1057 | OD2 | ASP A 138 | 13.055 | 1.080  | 17.474 | 1.00 | 23.07 | O |
| ATOM | 1058 | C   | ASP A 138 | 14.397 | 3.802  | 14.869 | 1.00 | 11.86 | C |
| ATOM | 1059 | O   | ASP A 138 | 13.475 | 3.991  | 15.663 | 1.00 | 13.88 | O |
| ATOM | 1060 | N   | LEU A 139 | 14.824 | 4.765  | 14.045 | 1.00 | 11.14 | N |
| ATOM | 1061 | CA  | LEU A 139 | 14.156 | 6.081  | 14.041 | 1.00 | 11.58 | C |
| ATOM | 1062 | CB  | LEU A 139 | 15.019 | 7.150  | 13.369 | 1.00 | 11.01 | C |
| ATOM | 1063 | CG  | LEU A 139 | 16.341 | 7.535  | 14.041 | 1.00 | 12.62 | C |
| ATOM | 1064 | CD1 | LEU A 139 | 17.153 | 8.400  | 13.079 | 1.00 | 11.16 | C |
| ATOM | 1065 | CD2 | LEU A 139 | 16.083 | 8.254  | 15.360 | 1.00 | 11.91 | C |
| ATOM | 1066 | C   | LEU A 139 | 12.788 | 5.994  | 13.372 | 1.00 | 12.85 | C |
| ATOM | 1067 | O   | LEU A 139 | 12.667 | 5.445  | 12.295 | 1.00 | 12.33 | O |
| ATOM | 1068 | N   | LYS A 140 | 11.769 | 6.527  | 14.046 | 1.00 | 11.09 | N |
| ATOM | 1069 | CA  | LYS A 140 | 10.373 | 6.493  | 13.593 | 1.00 | 10.31 | C |
| ATOM | 1070 | CB  | LYS A 140 | 9.769  | 5.089  | 13.773 | 1.00 | 11.07 | C |
| ATOM | 1071 | CG  | LYS A 140 | 9.740  | 4.593  | 15.211 | 1.00 | 12.06 | C |
| ATOM | 1072 | CD  | LYS A 140 | 9.596  | 3.090  | 15.269 | 1.00 | 17.59 | C |
| ATOM | 1073 | CE  | LYS A 140 | 9.636  | 2.624  | 16.708 | 1.00 | 20.54 | C |

|      |      |     |           |        |        |        |      |       |   |
|------|------|-----|-----------|--------|--------|--------|------|-------|---|
| ATOM | 1074 | NZ  | LYS A 140 | 10.073 | 1.202  | 16.814 | 1.00 | 21.74 | N |
| ATOM | 1075 | C   | LYS A 140 | 9.606  | 7.549  | 14.405 | 1.00 | 10.43 | C |
| ATOM | 1076 | O   | LYS A 140 | 10.115 | 8.008  | 15.425 | 1.00 | 12.96 | O |
| ATOM | 1077 | N   | PRO A 141 | 8.385  | 7.940  | 13.971 | 1.00 | 10.52 | N |
| ATOM | 1078 | CA  | PRO A 141 | 7.696  | 9.019  | 14.703 | 1.00 | 10.69 | C |
| ATOM | 1079 | CB  | PRO A 141 | 6.386  | 9.196  | 13.909 | 1.00 | 11.98 | C |
| ATOM | 1080 | CG  | PRO A 141 | 6.759  | 8.774  | 12.510 | 1.00 | 10.88 | C |
| ATOM | 1081 | CD  | PRO A 141 | 7.681  | 7.591  | 12.720 | 1.00 | 10.89 | C |
| ATOM | 1082 | C   | PRO A 141 | 7.420  | 8.719  | 16.182 | 1.00 | 11.33 | C |
| ATOM | 1083 | O   | PRO A 141 | 7.407  | 9.648  | 16.994 | 1.00 | 11.76 | O |
| ATOM | 1084 | N   | GLN A 142 | 7.271  | 7.439  | 16.526 | 1.00 | 13.18 | N |
| ATOM | 1085 | CA  | GLN A 142 | 7.041  | 6.988  | 17.911 | 1.00 | 16.28 | C |
| ATOM | 1086 | CB  | GLN A 142 | 6.710  | 5.490  | 17.960 | 1.00 | 17.67 | C |
| ATOM | 1087 | CG  | GLN A 142 | 5.367  | 5.094  | 17.356 | 1.00 | 16.38 | C |
| ATOM | 1088 | CD  | GLN A 142 | 5.338  | 5.110  | 15.832 | 1.00 | 21.47 | C |
| ATOM | 1089 | OE1 | GLN A 142 | 6.376  | 5.081  | 15.169 | 1.00 | 16.83 | O |
| ATOM | 1090 | NE2 | GLN A 142 | 4.129  | 5.164  | 15.267 | 1.00 | 23.75 | N |
| ATOM | 1091 | C   | GLN A 142 | 8.199  | 7.263  | 18.858 | 1.00 | 17.35 | C |
| ATOM | 1092 | O   | GLN A 142 | 7.986  | 7.362  | 20.070 | 1.00 | 17.57 | O |
| ATOM | 1093 | N   | ASN A 143 | 9.423  | 7.364  | 18.339 | 1.00 | 13.60 | N |
| ATOM | 1094 | CA  | ASN A 143 | 10.533 | 7.711  | 19.228 | 1.00 | 16.73 | C |
| ATOM | 1095 | CB  | ASN A 143 | 11.549 | 6.560  | 19.382 | 1.00 | 20.10 | C |
| ATOM | 1096 | CG  | ASN A 143 | 12.072 | 6.040  | 18.072 | 1.00 | 21.21 | C |
| ATOM | 1097 | OD1 | ASN A 143 | 12.276 | 6.801  | 17.120 | 1.00 | 20.84 | O |
| ATOM | 1098 | ND2 | ASN A 143 | 12.342 | 4.725  | 18.026 | 1.00 | 15.25 | N |
| ATOM | 1099 | C   | ASN A 143 | 11.174 | 9.080  | 18.993 | 1.00 | 15.87 | C |
| ATOM | 1100 | O   | ASN A 143 | 12.296 | 9.348  | 19.431 | 1.00 | 15.92 | O |
| ATOM | 1101 | N   | ILE A 144 | 10.416 | 9.957  | 18.334 | 1.00 | 15.15 | N |
| ATOM | 1102 | CA  | ILE A 144 | 10.732 | 11.373 | 18.270 | 1.00 | 13.73 | C |
| ATOM | 1103 | CB  | ILE A 144 | 10.558 | 11.963 | 16.840 | 1.00 | 15.22 | C |
| ATOM | 1104 | CG1 | ILE A 144 | 11.431 | 11.220 | 15.791 | 1.00 | 14.19 | C |
| ATOM | 1105 | CD1 | ILE A 144 | 12.935 | 11.259 | 16.015 | 1.00 | 20.91 | C |
| ATOM | 1106 | CG2 | ILE A 144 | 10.813 | 13.469 | 16.835 | 1.00 | 15.42 | C |
| ATOM | 1107 | C   | ILE A 144 | 9.777  | 12.028 | 19.278 | 1.00 | 14.22 | C |
| ATOM | 1108 | O   | ILE A 144 | 8.587  | 12.167 | 19.018 | 1.00 | 13.85 | O |
| ATOM | 1109 | N   | LEU A 145 | 10.304 | 12.378 | 20.445 | 1.00 | 12.95 | N |
| ATOM | 1110 | CA  | LEU A 145 | 9.468  | 12.898 | 21.535 | 1.00 | 14.74 | C |
| ATOM | 1111 | CB  | LEU A 145 | 10.014 | 12.432 | 22.892 | 1.00 | 16.54 | C |
| ATOM | 1112 | CG  | LEU A 145 | 10.240 | 10.935 | 23.113 | 1.00 | 20.56 | C |
| ATOM | 1113 | CD1 | LEU A 145 | 10.654 | 10.715 | 24.561 | 1.00 | 23.45 | C |
| ATOM | 1114 | CD2 | LEU A 145 | 9.015  | 10.092 | 22.771 | 1.00 | 18.07 | C |
| ATOM | 1115 | C   | LEU A 145 | 9.394  | 14.414 | 21.524 | 1.00 | 13.89 | C |

|      |      |     |           |        |        |        |      |       |   |
|------|------|-----|-----------|--------|--------|--------|------|-------|---|
| ATOM | 1116 | O   | LEU A 145 | 10.371 | 15.073 | 21.177 | 1.00 | 17.80 | O |
| ATOM | 1117 | N   | LEU A 146 | 8.240  | 14.950 | 21.936 | 1.00 | 14.58 | N |
| ATOM | 1118 | CA  | LEU A 146 | 7.995  | 16.395 | 21.957 | 1.00 | 16.94 | C |
| ATOM | 1119 | CB  | LEU A 146 | 6.780  | 16.773 | 21.094 | 1.00 | 18.77 | C |
| ATOM | 1120 | CG  | LEU A 146 | 6.774  | 16.307 | 19.621 | 1.00 | 18.87 | C |
| ATOM | 1121 | CD1 | LEU A 146 | 5.490  | 16.747 | 18.935 | 1.00 | 20.54 | C |
| ATOM | 1122 | CD2 | LEU A 146 | 7.988  | 16.801 | 18.843 | 1.00 | 19.00 | C |
| ATOM | 1123 | C   | LEU A 146 | 7.807  | 16.895 | 23.392 | 1.00 | 17.78 | C |
| ATOM | 1124 | O   | LEU A 146 | 7.276  | 16.186 | 24.236 | 1.00 | 18.61 | O |
| ATOM | 1125 | N   | SER A 147 | 8.248  | 18.123 | 23.639 | 1.00 | 22.58 | N |
| ATOM | 1126 | CA  | SER A 147 | 8.206  | 18.725 | 24.971 | 1.00 | 27.75 | C |
| ATOM | 1127 | CB  | SER A 147 | 9.493  | 18.388 | 25.725 | 1.00 | 26.52 | C |
| ATOM | 1128 | OG  | SER A 147 | 9.523  | 19.001 | 26.998 | 1.00 | 55.83 | O |
| ATOM | 1129 | C   | SER A 147 | 8.034  | 20.238 | 24.851 | 1.00 | 32.95 | C |
| ATOM | 1130 | O   | SER A 147 | 8.739  | 20.886 | 24.069 | 1.00 | 31.56 | O |
| ATOM | 1131 | N   | ASN A 148 | 7.086  | 20.786 | 25.613 | 1.00 | 35.46 | N |
| ATOM | 1132 | CA  | ASN A 148 | 6.831  | 22.234 | 25.630 | 1.00 | 42.46 | C |
| ATOM | 1133 | CB  | ASN A 148 | 5.347  | 22.526 | 25.869 | 1.00 | 43.63 | C |
| ATOM | 1134 | C   | ASN A 148 | 7.689  | 22.959 | 26.666 | 1.00 | 43.62 | C |
| ATOM | 1135 | O   | ASN A 148 | 7.778  | 22.535 | 27.822 | 1.00 | 34.13 | O |
| ATOM | 1136 | N   | SER A 158 | 8.076  | 26.830 | 20.486 | 1.00 | 33.35 | N |
| ATOM | 1137 | CA  | SER A 158 | 8.918  | 26.417 | 21.606 | 1.00 | 41.28 | C |
| ATOM | 1138 | CB  | SER A 158 | 8.494  | 27.145 | 22.886 | 1.00 | 29.61 | C |
| ATOM | 1139 | OG  | SER A 158 | 7.165  | 26.814 | 23.241 | 1.00 | 43.12 | O |
| ATOM | 1140 | C   | SER A 158 | 8.943  | 24.895 | 21.839 | 1.00 | 39.59 | C |
| ATOM | 1141 | O   | SER A 158 | 9.577  | 24.427 | 22.801 | 1.00 | 43.28 | O |
| ATOM | 1142 | N   | ILE A 159 | 8.266  | 24.136 | 20.965 | 1.00 | 38.89 | N |
| ATOM | 1143 | CA  | ILE A 159 | 8.274  | 22.666 | 21.026 | 1.00 | 31.85 | C |
| ATOM | 1144 | CB  | ILE A 159 | 7.327  | 21.995 | 19.987 | 1.00 | 29.86 | C |
| ATOM | 1145 | CG1 | ILE A 159 | 5.859  | 22.285 | 20.326 | 1.00 | 35.64 | C |
| ATOM | 1146 | CD1 | ILE A 159 | 4.864  | 21.916 | 19.243 | 1.00 | 38.01 | C |
| ATOM | 1147 | CG2 | ILE A 159 | 7.554  | 20.477 | 19.934 | 1.00 | 30.36 | C |
| ATOM | 1148 | C   | ILE A 159 | 9.707  | 22.187 | 20.845 | 1.00 | 27.27 | C |
| ATOM | 1149 | O   | ILE A 159 | 10.359 | 22.491 | 19.835 | 1.00 | 31.19 | O |
| ATOM | 1150 | N   | ARG A 160 | 10.198 | 21.480 | 21.858 | 1.00 | 27.74 | N |
| ATOM | 1151 | CA  | ARG A 160 | 11.497 | 20.829 | 21.799 | 1.00 | 25.69 | C |
| ATOM | 1152 | CB  | ARG A 160 | 12.232 | 20.895 | 23.148 | 1.00 | 34.93 | C |
| ATOM | 1153 | CG  | ARG A 160 | 12.413 | 22.292 | 23.755 | 1.00 | 39.54 | C |
| ATOM | 1154 | CD  | ARG A 160 | 13.088 | 23.295 | 22.823 | 1.00 | 33.52 | C |
| ATOM | 1155 | NE  | ARG A 160 | 14.454 | 22.909 | 22.465 | 1.00 | 35.10 | N |
| ATOM | 1156 | CZ  | ARG A 160 | 15.104 | 23.326 | 21.377 | 1.00 | 42.46 | C |
| ATOM | 1157 | NH1 | ARG A 160 | 16.339 | 22.898 | 21.145 | 1.00 | 33.44 | N |

|      |      |     |     |   |     |        |        |        |      |       |   |
|------|------|-----|-----|---|-----|--------|--------|--------|------|-------|---|
| ATOM | 1158 | NH2 | ARG | A | 160 | 14.526 | 24.154 | 20.508 | 1.00 | 37.73 | N |
| ATOM | 1159 | C   | ARG | A | 160 | 11.328 | 19.376 | 21.348 | 1.00 | 26.10 | C |
| ATOM | 1160 | O   | ARG | A | 160 | 10.362 | 18.701 | 21.735 | 1.00 | 23.12 | O |
| ATOM | 1161 | N   | VAL | A | 161 | 12.259 | 18.932 | 20.506 | 1.00 | 21.27 | N |
| ATOM | 1162 | CA  | VAL | A | 161 | 12.318 | 17.561 | 19.985 | 1.00 | 21.18 | C |
| ATOM | 1163 | CB  | VAL | A | 161 | 12.607 | 17.548 | 18.455 | 1.00 | 21.45 | C |
| ATOM | 1164 | CG1 | VAL | A | 161 | 13.020 | 16.158 | 17.961 | 1.00 | 22.92 | C |
| ATOM | 1165 | CG2 | VAL | A | 161 | 11.412 | 18.063 | 17.678 | 1.00 | 29.16 | C |
| ATOM | 1166 | C   | VAL | A | 161 | 13.432 | 16.829 | 20.719 | 1.00 | 22.68 | C |
| ATOM | 1167 | O   | VAL | A | 161 | 14.542 | 17.357 | 20.876 | 1.00 | 23.88 | O |
| ATOM | 1168 | N   | LYS | A | 162 | 13.136 | 15.611 | 21.157 | 1.00 | 20.68 | N |
| ATOM | 1169 | CA  | LYS | A | 162 | 14.132 | 14.750 | 21.779 | 1.00 | 22.61 | C |
| ATOM | 1170 | CB  | LYS | A | 162 | 13.980 | 14.747 | 23.301 | 1.00 | 22.21 | C |
| ATOM | 1171 | CG  | LYS | A | 162 | 14.657 | 15.942 | 23.972 | 1.00 | 28.80 | C |
| ATOM | 1172 | CD  | LYS | A | 162 | 13.791 | 16.541 | 25.058 | 1.00 | 33.73 | C |
| ATOM | 1173 | CE  | LYS | A | 162 | 14.125 | 18.009 | 25.295 | 1.00 | 32.82 | C |
| ATOM | 1174 | NZ  | LYS | A | 162 | 15.341 | 18.187 | 26.135 | 1.00 | 32.21 | N |
| ATOM | 1175 | C   | LYS | A | 162 | 14.037 | 13.337 | 21.226 | 1.00 | 21.05 | C |
| ATOM | 1176 | O   | LYS | A | 162 | 12.960 | 12.724 | 21.238 | 1.00 | 19.91 | O |
| ATOM | 1177 | N   | ILE | A | 163 | 15.170 | 12.833 | 20.747 | 1.00 | 14.87 | N |
| ATOM | 1178 | CA  | ILE | A | 163 | 15.247 | 11.463 | 20.230 | 1.00 | 16.59 | C |
| ATOM | 1179 | CB  | ILE | A | 163 | 16.411 | 11.290 | 19.224 | 1.00 | 17.82 | C |
| ATOM | 1180 | CG1 | ILE | A | 163 | 16.200 | 12.258 | 18.046 | 1.00 | 18.18 | C |
| ATOM | 1181 | CD1 | ILE | A | 163 | 17.320 | 12.313 | 17.037 | 1.00 | 25.12 | C |
| ATOM | 1182 | CG2 | ILE | A | 163 | 16.510 | 9.840  | 18.746 | 1.00 | 17.88 | C |
| ATOM | 1183 | C   | ILE | A | 163 | 15.331 | 10.491 | 21.417 | 1.00 | 18.56 | C |
| ATOM | 1184 | O   | ILE | A | 163 | 16.123 | 10.691 | 22.353 | 1.00 | 18.90 | O |
| ATOM | 1185 | N   | ALA | A | 164 | 14.476 | 9.471  | 21.383 | 1.00 | 16.50 | N |
| ATOM | 1186 | CA  | ALA | A | 164 | 14.434 | 8.452  | 22.417 | 1.00 | 21.23 | C |
| ATOM | 1187 | CB  | ALA | A | 164 | 13.075 | 8.468  | 23.099 | 1.00 | 17.00 | C |
| ATOM | 1188 | C   | ALA | A | 164 | 14.716 | 7.070  | 21.843 | 1.00 | 18.93 | C |
| ATOM | 1189 | O   | ALA | A | 164 | 14.938 | 6.923  | 20.629 | 1.00 | 19.41 | O |
| ATOM | 1190 | N   | ASP | A | 165 | 14.730 | 6.075  | 22.738 | 1.00 | 17.02 | N |
| ATOM | 1191 | CA  | ASP | A | 165 | 14.591 | 4.652  | 22.391 | 1.00 | 15.02 | C |
| ATOM | 1192 | CB  | ASP | A | 165 | 13.343 | 4.458  | 21.516 | 1.00 | 21.24 | C |
| ATOM | 1193 | CG  | ASP | A | 165 | 12.687 | 3.117  | 21.690 | 1.00 | 23.40 | C |
| ATOM | 1194 | OD1 | ASP | A | 165 | 12.849 | 2.478  | 22.750 | 1.00 | 21.20 | O |
| ATOM | 1195 | OD2 | ASP | A | 165 | 11.966 | 2.721  | 20.745 | 1.00 | 27.85 | O |
| ATOM | 1196 | C   | ASP | A | 165 | 15.859 | 4.140  | 21.720 | 1.00 | 20.03 | C |
| ATOM | 1197 | O   | ASP | A | 165 | 15.865 | 3.808  | 20.523 | 1.00 | 14.62 | O |
| ATOM | 1198 | N   | PHE | A | 166 | 16.937 | 4.091  | 22.502 | 1.00 | 15.34 | N |
| ATOM | 1199 | CA  | PHE | A | 166 | 18.268 | 3.775  | 21.987 | 1.00 | 16.88 | C |

|      |      |     |           |        |        |        |      |       |   |
|------|------|-----|-----------|--------|--------|--------|------|-------|---|
| ATOM | 1200 | CB  | PHE A 166 | 19.305 | 4.741  | 22.602 | 1.00 | 16.39 | C |
| ATOM | 1201 | CG  | PHE A 166 | 19.370 | 6.080  | 21.913 | 1.00 | 15.29 | C |
| ATOM | 1202 | CD1 | PHE A 166 | 20.368 | 6.344  | 20.970 | 1.00 | 17.60 | C |
| ATOM | 1203 | CE1 | PHE A 166 | 20.430 | 7.584  | 20.332 | 1.00 | 20.05 | C |
| ATOM | 1204 | CZ  | PHE A 166 | 19.495 | 8.576  | 20.639 | 1.00 | 16.27 | C |
| ATOM | 1205 | CE2 | PHE A 166 | 18.499 | 8.325  | 21.574 | 1.00 | 16.20 | C |
| ATOM | 1206 | CD2 | PHE A 166 | 18.443 | 7.085  | 22.211 | 1.00 | 18.63 | C |
| ATOM | 1207 | C   | PHE A 166 | 18.715 | 2.318  | 22.157 | 1.00 | 17.76 | C |
| ATOM | 1208 | O   | PHE A 166 | 19.893 | 2.014  | 21.969 | 1.00 | 19.64 | O |
| ATOM | 1209 | N   | GLY A 167 | 17.781 | 1.420  | 22.477 | 1.00 | 19.05 | N |
| ATOM | 1210 | CA  | GLY A 167 | 18.092 | -0.005 | 22.688 | 1.00 | 20.47 | C |
| ATOM | 1211 | C   | GLY A 167 | 18.668 | -0.745 | 21.490 | 1.00 | 21.42 | C |
| ATOM | 1212 | O   | GLY A 167 | 19.443 | -1.694 | 21.658 | 1.00 | 19.65 | O |
| ATOM | 1213 | N   | PHE A 168 | 18.287 | -0.320 | 20.283 | 1.00 | 16.84 | N |
| ATOM | 1214 | CA  | PHE A 168 | 18.785 | -0.944 | 19.052 | 1.00 | 18.06 | C |
| ATOM | 1215 | CB  | PHE A 168 | 17.693 | -0.987 | 17.970 | 1.00 | 17.01 | C |
| ATOM | 1216 | CG  | PHE A 168 | 16.670 | -2.074 | 18.174 | 1.00 | 20.29 | C |
| ATOM | 1217 | CD1 | PHE A 168 | 17.006 | -3.425 | 17.982 | 1.00 | 20.73 | C |
| ATOM | 1218 | CE1 | PHE A 168 | 16.053 | -4.428 | 18.160 | 1.00 | 23.86 | C |
| ATOM | 1219 | CZ  | PHE A 168 | 14.754 | -4.092 | 18.536 | 1.00 | 25.23 | C |
| ATOM | 1220 | CE2 | PHE A 168 | 14.407 | -2.757 | 18.723 | 1.00 | 26.36 | C |
| ATOM | 1221 | CD2 | PHE A 168 | 15.364 | -1.756 | 18.541 | 1.00 | 22.06 | C |
| ATOM | 1222 | C   | PHE A 168 | 20.049 | -0.290 | 18.502 | 1.00 | 18.45 | C |
| ATOM | 1223 | O   | PHE A 168 | 20.588 | -0.752 | 17.488 | 1.00 | 19.30 | O |
| ATOM | 1224 | N   | ALA A 169 | 20.522 | 0.771  | 19.164 | 1.00 | 17.88 | N |
| ATOM | 1225 | CA  | ALA A 169 | 21.685 | 1.529  | 18.692 | 1.00 | 17.69 | C |
| ATOM | 1226 | CB  | ALA A 169 | 21.883 | 2.799  | 19.499 | 1.00 | 19.65 | C |
| ATOM | 1227 | C   | ALA A 169 | 22.949 | 0.681  | 18.705 | 1.00 | 27.06 | C |
| ATOM | 1228 | O   | ALA A 169 | 23.120 | -0.173 | 19.581 | 1.00 | 24.55 | O |
| ATOM | 1229 | N   | ARG A 170 | 23.812 | 0.896  | 17.716 | 1.00 | 23.69 | N |
| ATOM | 1230 | CA  | ARG A 170 | 25.103 | 0.206  | 17.683 | 1.00 | 31.70 | C |
| ATOM | 1231 | CB  | ARG A 170 | 25.050 | -1.070 | 16.822 | 1.00 | 34.41 | C |
| ATOM | 1232 | CG  | ARG A 170 | 24.871 | -0.859 | 15.331 | 1.00 | 38.87 | C |
| ATOM | 1233 | CD  | ARG A 170 | 25.554 | -1.945 | 14.511 | 1.00 | 54.55 | C |
| ATOM | 1234 | NE  | ARG A 170 | 25.653 | -1.556 | 13.100 | 1.00 | 68.55 | N |
| ATOM | 1235 | CZ  | ARG A 170 | 26.257 | -2.264 | 12.144 | 1.00 | 72.65 | C |
| ATOM | 1236 | NH1 | ARG A 170 | 26.841 | -3.431 | 12.414 | 1.00 | 92.29 | N |
| ATOM | 1237 | NH2 | ARG A 170 | 26.277 | -1.798 | 10.901 | 1.00 | 53.80 | N |
| ATOM | 1238 | C   | ARG A 170 | 26.242 | 1.126  | 17.271 | 1.00 | 32.16 | C |
| ATOM | 1239 | O   | ARG A 170 | 26.025 | 2.131  | 16.589 | 1.00 | 23.31 | O |
| ATOM | 1240 | N   | TYR A 171 | 27.446 | 0.793  | 17.732 | 1.00 | 32.92 | N |
| ATOM | 1241 | CA  | TYR A 171 | 28.666 | 1.440  | 17.267 | 1.00 | 32.02 | C |

|        |      |     |           |        |         |        |      |       |   |
|--------|------|-----|-----------|--------|---------|--------|------|-------|---|
| ATOM   | 1242 | CB  | TYR A 171 | 29.784 | 1.304   | 18.306 | 1.00 | 34.01 | C |
| ATOM   | 1243 | CG  | TYR A 171 | 29.586 | 2.145   | 19.551 | 1.00 | 36.98 | C |
| ATOM   | 1244 | CD1 | TYR A 171 | 30.176 | 3.412   | 19.666 | 1.00 | 35.28 | C |
| ATOM   | 1245 | CE1 | TYR A 171 | 30.003 | 4.185   | 20.811 | 1.00 | 37.94 | C |
| ATOM   | 1246 | CZ  | TYR A 171 | 29.226 | 3.690   | 21.858 | 1.00 | 38.81 | C |
| ATOM   | 1247 | OH  | TYR A 171 | 29.042 | 4.438   | 22.998 | 1.00 | 46.39 | O |
| ATOM   | 1248 | CE2 | TYR A 171 | 28.634 | 2.441   | 21.769 | 1.00 | 39.26 | C |
| ATOM   | 1249 | CD2 | TYR A 171 | 28.812 | 1.676   | 20.622 | 1.00 | 39.57 | C |
| ATOM   | 1250 | C   | TYR A 171 | 29.081 | 0.825   | 15.929 | 1.00 | 30.71 | C |
| ATOM   | 1251 | O   | TYR A 171 | 28.981 | -0.392  | 15.741 | 1.00 | 33.51 | O |
| ATOM   | 1252 | N   | LEU A 172 | 29.543 | 1.676   | 15.013 | 1.00 | 29.24 | N |
| ATOM   | 1253 | CA  | LEU A 172 | 29.865 | 1.291   | 13.628 | 1.00 | 33.38 | C |
| ATOM   | 1254 | CB  | LEU A 172 | 30.272 | 2.526   | 12.819 | 1.00 | 36.90 | C |
| ATOM   | 1255 | C   | LEU A 172 | 30.933 | 0.195   | 13.494 | 1.00 | 44.48 | C |
| ATOM   | 1256 | O   | LEU A 172 | 31.732 | -0.038  | 14.405 | 1.00 | 51.01 | O |
| ATOM   | 1257 | N   | THR A 180 | 19.864 | -8.311  | 16.597 | 1.00 | 43.75 | N |
| ATOM   | 1258 | CA  | THR A 180 | 18.645 | -8.627  | 15.863 | 1.00 | 44.11 | C |
| ATOM   | 1259 | CB  | THR A 180 | 17.930 | -9.879  | 16.441 | 1.00 | 54.06 | C |
| ATOM   | 1260 | OG1 | THR A 180 | 18.893 | -10.875 | 16.821 | 1.00 | 57.22 | O |
| ATOM   | 1261 | CG2 | THR A 180 | 16.956 | -10.477 | 15.421 | 1.00 | 52.76 | C |
| ATOM   | 1262 | C   | THR A 180 | 17.702 | -7.417  | 15.878 | 1.00 | 35.29 | C |
| ATOM   | 1263 | O   | THR A 180 | 17.105 | -7.099  | 16.913 | 1.00 | 37.12 | O |
| ATOM   | 1264 | N   | LEU A 181 | 17.579 | -6.753  | 14.729 | 1.00 | 29.50 | N |
| ATOM   | 1265 | CA  | LEU A 181 | 16.720 | -5.570  | 14.588 | 1.00 | 23.94 | C |
| ATOM   | 1266 | CB  | LEU A 181 | 17.321 | -4.572  | 13.581 | 1.00 | 28.75 | C |
| ATOM   | 1267 | CG  | LEU A 181 | 16.604 | -3.246  | 13.275 | 1.00 | 26.85 | C |
| ATOM   | 1268 | CD1 | LEU A 181 | 16.614 | -2.300  | 14.470 | 1.00 | 27.73 | C |
| ATOM   | 1269 | CD2 | LEU A 181 | 17.265 | -2.587  | 12.075 | 1.00 | 27.56 | C |
| ATOM   | 1270 | C   | LEU A 181 | 15.291 | -5.925  | 14.190 | 1.00 | 25.48 | C |
| ATOM   | 1271 | O   | LEU A 181 | 15.074 | -6.705  | 13.259 | 1.00 | 27.45 | O |
| HETATM | 1272 | N   | CSO A 182 | 14.327 | -5.362  | 14.918 | 1.00 | 20.20 | N |
| HETATM | 1273 | CA  | CSO A 182 | 12.930 | -5.306  | 14.465 | 1.00 | 25.14 | C |
| HETATM | 1274 | CB  | CSO A 182 | 12.039 | -6.468  | 14.935 | 1.00 | 23.17 | C |
| HETATM | 1275 | SG  | CSO A 182 | 11.954 | -6.596  | 16.698 | 1.00 | 27.59 | S |
| HETATM | 1276 | OD  | CSO A 182 | 13.218 | -7.772  | 16.977 | 1.00 | 31.77 | O |
| HETATM | 1277 | C   | CSO A 182 | 12.373 | -3.963  | 14.856 | 1.00 | 22.32 | C |
| HETATM | 1278 | O   | CSO A 182 | 12.799 | -3.356  | 15.846 | 1.00 | 28.32 | O |
| ATOM   | 1279 | N   | GLY A 183 | 11.447 | -3.471  | 14.048 | 1.00 | 20.98 | N |
| ATOM   | 1280 | CA  | GLY A 183 | 10.759 | -2.226  | 14.342 | 1.00 | 17.89 | C |
| ATOM   | 1281 | C   | GLY A 183 | 9.685  | -1.977  | 13.313 | 1.00 | 16.49 | C |
| ATOM   | 1282 | O   | GLY A 183 | 8.717  | -2.736  | 13.215 | 1.00 | 17.36 | O |
| ATOM   | 1283 | N   | SER A 184 | 9.855  | -0.907  | 12.542 | 1.00 | 16.25 | N |

|      |      |     |           |        |        |        |      |       |   |
|------|------|-----|-----------|--------|--------|--------|------|-------|---|
| ATOM | 1284 | CA  | SER A 184 | 8.870  | -0.551 | 11.510 | 1.00 | 14.38 | C |
| ATOM | 1285 | CB  | SER A 184 | 8.118  | 0.732  | 11.871 | 1.00 | 16.61 | C |
| ATOM | 1286 | OG  | SER A 184 | 7.423  | 0.553  | 13.098 | 1.00 | 19.65 | O |
| ATOM | 1287 | C   | SER A 184 | 9.550  | -0.440 | 10.160 | 1.00 | 16.51 | C |
| ATOM | 1288 | O   | SER A 184 | 10.147 | 0.595  | 9.848  | 1.00 | 13.01 | O |
| ATOM | 1289 | N   | PRO A 185 | 9.475  | -1.520 | 9.353  | 1.00 | 15.19 | N |
| ATOM | 1290 | CA  | PRO A 185 | 10.201 | -1.573 | 8.078  | 1.00 | 12.71 | C |
| ATOM | 1291 | CB  | PRO A 185 | 9.702  | -2.884 | 7.460  | 1.00 | 13.25 | C |
| ATOM | 1292 | CG  | PRO A 185 | 9.451  | -3.755 | 8.655  | 1.00 | 14.82 | C |
| ATOM | 1293 | CD  | PRO A 185 | 8.844  | -2.821 | 9.672  | 1.00 | 15.76 | C |
| ATOM | 1294 | C   | PRO A 185 | 9.950  | -0.376 | 7.144  | 1.00 | 12.33 | C |
| ATOM | 1295 | O   | PRO A 185 | 10.851 | -0.010 | 6.376  | 1.00 | 12.44 | O |
| ATOM | 1296 | N   | MET A 186 | 8.775  | 0.266  | 7.226  | 1.00 | 11.54 | N |
| ATOM | 1297 | CA  | MET A 186 | 8.506  | 1.421  | 6.348  | 1.00 | 11.15 | C |
| ATOM | 1298 | CB  | MET A 186 | 7.047  | 1.902  | 6.418  | 1.00 | 16.10 | C |
| ATOM | 1299 | CG  | MET A 186 | 6.617  | 2.530  | 7.729  | 1.00 | 21.70 | C |
| ATOM | 1300 | SD  | MET A 186 | 5.009  | 3.361  | 7.607  | 1.00 | 28.92 | S |
| ATOM | 1301 | CE  | MET A 186 | 4.005  | 2.164  | 6.728  | 1.00 | 30.43 | C |
| ATOM | 1302 | C   | MET A 186 | 9.495  | 2.580  | 6.560  | 1.00 | 9.99  | C |
| ATOM | 1303 | O   | MET A 186 | 9.698  | 3.370  | 5.643  | 1.00 | 10.22 | O |
| ATOM | 1304 | N   | TYR A 187 | 10.114 | 2.647  | 7.752  | 1.00 | 8.10  | N |
| ATOM | 1305 | CA  | TYR A 187 | 11.142 | 3.666  | 8.061  | 1.00 | 8.73  | C |
| ATOM | 1306 | CB  | TYR A 187 | 10.942 | 4.258  | 9.460  | 1.00 | 8.41  | C |
| ATOM | 1307 | CG  | TYR A 187 | 9.551  | 4.810  | 9.651  | 1.00 | 8.64  | C |
| ATOM | 1308 | CD1 | TYR A 187 | 8.619  | 4.107  | 10.413 | 1.00 | 9.71  | C |
| ATOM | 1309 | CE1 | TYR A 187 | 7.330  | 4.587  | 10.582 | 1.00 | 11.17 | C |
| ATOM | 1310 | CZ  | TYR A 187 | 6.946  | 5.776  | 9.971  | 1.00 | 13.11 | C |
| ATOM | 1311 | OH  | TYR A 187 | 5.653  | 6.208  | 10.161 | 1.00 | 12.36 | O |
| ATOM | 1312 | CE2 | TYR A 187 | 7.846  | 6.500  | 9.194  | 1.00 | 11.62 | C |
| ATOM | 1313 | CD2 | TYR A 187 | 9.144  | 6.007  | 9.030  | 1.00 | 10.63 | C |
| ATOM | 1314 | C   | TYR A 187 | 12.596 | 3.190  | 7.893  | 1.00 | 8.62  | C |
| ATOM | 1315 | O   | TYR A 187 | 13.524 | 3.982  | 8.045  | 1.00 | 11.14 | O |
| ATOM | 1316 | N   | MET A 188 | 12.786 | 1.934  | 7.514  | 1.00 | 9.27  | N |
| ATOM | 1317 | CA  | MET A 188 | 14.127 | 1.353  | 7.417  | 1.00 | 9.63  | C |
| ATOM | 1318 | CB  | MET A 188 | 14.075 | -0.113 | 7.826  | 1.00 | 11.65 | C |
| ATOM | 1319 | CG  | MET A 188 | 13.775 | -0.292 | 9.303  | 1.00 | 16.05 | C |
| ATOM | 1320 | SD  | MET A 188 | 13.722 | -2.044 | 9.665  | 1.00 | 20.68 | S |
| ATOM | 1321 | CE  | MET A 188 | 13.465 | -1.943 | 11.441 | 1.00 | 24.87 | C |
| ATOM | 1322 | C   | MET A 188 | 14.725 | 1.475  | 6.022  | 1.00 | 8.93  | C |
| ATOM | 1323 | O   | MET A 188 | 14.023 | 1.328  | 5.020  | 1.00 | 9.35  | O |
| ATOM | 1324 | N   | ALA A 189 | 16.027 | 1.759  | 5.964  | 1.00 | 8.86  | N |
| ATOM | 1325 | CA  | ALA A 189 | 16.720 | 1.948  | 4.689  | 1.00 | 9.34  | C |

|      |      |     |           |        |        |        |      |       |   |
|------|------|-----|-----------|--------|--------|--------|------|-------|---|
| ATOM | 1326 | CB  | ALA A 189 | 18.168 | 2.381  | 4.935  | 1.00 | 9.48  | C |
| ATOM | 1327 | C   | ALA A 189 | 16.680 | 0.673  | 3.839  | 1.00 | 9.03  | C |
| ATOM | 1328 | O   | ALA A 189 | 16.691 | -0.435 | 4.396  | 1.00 | 9.80  | O |
| ATOM | 1329 | N   | PRO A 190 | 16.659 | 0.820  | 2.493  | 1.00 | 9.00  | N |
| ATOM | 1330 | CA  | PRO A 190 | 16.656 | -0.351 | 1.618  | 1.00 | 8.60  | C |
| ATOM | 1331 | CB  | PRO A 190 | 16.789 | 0.257  | 0.223  | 1.00 | 8.56  | C |
| ATOM | 1332 | CG  | PRO A 190 | 16.064 | 1.585  | 0.366  | 1.00 | 8.66  | C |
| ATOM | 1333 | CD  | PRO A 190 | 16.524 | 2.073  | 1.710  | 1.00 | 8.62  | C |
| ATOM | 1334 | C   | PRO A 190 | 17.785 | -1.343 | 1.917  | 1.00 | 8.26  | C |
| ATOM | 1335 | O   | PRO A 190 | 17.528 | -2.539 | 1.973  | 1.00 | 7.13  | O |
| ATOM | 1336 | N   | GLU A 191 | 18.994 | -0.840 | 2.175  | 1.00 | 8.55  | N |
| ATOM | 1337 | CA  | GLU A 191 | 20.132 | -1.731 | 2.515  | 1.00 | 9.25  | C |
| ATOM | 1338 | CB  | GLU A 191 | 21.467 | -0.971 | 2.514  | 1.00 | 10.18 | C |
| ATOM | 1339 | CG  | GLU A 191 | 21.603 | 0.119  | 3.580  | 1.00 | 9.38  | C |
| ATOM | 1340 | CD  | GLU A 191 | 21.107 | 1.502  | 3.161  | 1.00 | 8.37  | C |
| ATOM | 1341 | OE1 | GLU A 191 | 20.275 | 1.643  | 2.242  | 1.00 | 8.53  | O |
| ATOM | 1342 | OE2 | GLU A 191 | 21.540 | 2.481  | 3.798  | 1.00 | 8.93  | O |
| ATOM | 1343 | C   | GLU A 191 | 19.931 | -2.512 | 3.821  | 1.00 | 11.64 | C |
| ATOM | 1344 | O   | GLU A 191 | 20.433 | -3.631 | 3.972  | 1.00 | 11.91 | O |
| ATOM | 1345 | N   | VAL A 192 | 19.182 | -1.932 | 4.755  | 1.00 | 10.37 | N |
| ATOM | 1346 | CA  | VAL A 192 | 18.874 | -2.611 | 6.004  | 1.00 | 9.97  | C |
| ATOM | 1347 | CB  | VAL A 192 | 18.348 | -1.646 | 7.081  | 1.00 | 9.28  | C |
| ATOM | 1348 | CG1 | VAL A 192 | 17.839 | -2.401 | 8.306  | 1.00 | 8.93  | C |
| ATOM | 1349 | CG2 | VAL A 192 | 19.406 | -0.619 | 7.456  | 1.00 | 10.71 | C |
| ATOM | 1350 | C   | VAL A 192 | 17.868 | -3.720 | 5.720  | 1.00 | 11.10 | C |
| ATOM | 1351 | O   | VAL A 192 | 18.067 | -4.869 | 6.125  | 1.00 | 13.23 | O |
| ATOM | 1352 | N   | ILE A 193 | 16.786 | -3.372 | 5.033  | 1.00 | 10.35 | N |
| ATOM | 1353 | CA  | ILE A 193 | 15.756 | -4.354 | 4.645  | 1.00 | 12.16 | C |
| ATOM | 1354 | CB  | ILE A 193 | 14.583 | -3.629 | 3.958  | 1.00 | 15.45 | C |
| ATOM | 1355 | CG1 | ILE A 193 | 13.741 | -2.941 | 5.041  | 1.00 | 20.64 | C |
| ATOM | 1356 | CD1 | ILE A 193 | 13.004 | -1.730 | 4.543  | 1.00 | 30.99 | C |
| ATOM | 1357 | CG2 | ILE A 193 | 13.704 | -4.579 | 3.152  | 1.00 | 17.46 | C |
| ATOM | 1358 | C   | ILE A 193 | 16.313 | -5.518 | 3.799  | 1.00 | 13.09 | C |
| ATOM | 1359 | O   | ILE A 193 | 15.900 | -6.684 | 3.962  | 1.00 | 14.68 | O |
| ATOM | 1360 | N   | MET A 194 | 17.267 | -5.199 | 2.936  | 1.00 | 12.28 | N |
| ATOM | 1361 | CA  | MET A 194 | 17.851 | -6.173 | 2.013  | 1.00 | 12.33 | C |
| ATOM | 1362 | CB  | MET A 194 | 18.220 | -5.509 | 0.681  | 1.00 | 12.32 | C |
| ATOM | 1363 | CG  | MET A 194 | 17.019 | -5.017 | -0.130 | 1.00 | 12.89 | C |
| ATOM | 1364 | SD  | MET A 194 | 17.408 | -4.352 | -1.761 | 1.00 | 15.67 | S |
| ATOM | 1365 | CE  | MET A 194 | 18.449 | -2.922 | -1.431 | 1.00 | 9.92  | C |
| ATOM | 1366 | C   | MET A 194 | 19.043 | -6.925 | 2.611  | 1.00 | 13.92 | C |
| ATOM | 1367 | O   | MET A 194 | 19.711 | -7.681 | 1.896  | 1.00 | 15.36 | O |



|      |      |     |           |        |        |        |      |       |   |
|------|------|-----|-----------|--------|--------|--------|------|-------|---|
| ATOM | 1368 | N   | ALA A 195 | 19.289 | -6.716 | 3.906  | 1.00 | 13.39 | N |
| ATOM | 1369 | CA  | ALA A 195 | 20.310 | -7.440 | 4.683  | 1.00 | 16.18 | C |
| ATOM | 1370 | CB  | ALA A 195 | 19.951 | -8.936 | 4.789  | 1.00 | 18.84 | C |
| ATOM | 1371 | C   | ALA A 195 | 21.723 | -7.227 | 4.121  | 1.00 | 18.67 | C |
| ATOM | 1372 | O   | ALA A 195 | 22.548 | -8.158 | 4.059  | 1.00 | 15.88 | O |
| ATOM | 1373 | N   | GLN A 196 | 21.984 | -5.991 | 3.707  | 1.00 | 14.01 | N |
| ATOM | 1374 | CA  | GLN A 196 | 23.280 | -5.579 | 3.144  | 1.00 | 14.62 | C |
| ATOM | 1375 | CB  | GLN A 196 | 23.044 | -4.704 | 1.911  | 1.00 | 13.01 | C |
| ATOM | 1376 | CG  | GLN A 196 | 22.336 | -5.442 | 0.777  | 1.00 | 13.15 | C |
| ATOM | 1377 | CD  | GLN A 196 | 22.064 | -4.565 | -0.420 | 1.00 | 15.39 | C |
| ATOM | 1378 | OE1 | GLN A 196 | 22.453 | -3.398 | -0.453 | 1.00 | 22.68 | O |
| ATOM | 1379 | NE2 | GLN A 196 | 21.417 | -5.130 | -1.427 | 1.00 | 17.06 | N |
| ATOM | 1380 | C   | GLN A 196 | 24.093 | -4.814 | 4.183  | 1.00 | 15.02 | C |
| ATOM | 1381 | O   | GLN A 196 | 23.624 | -4.609 | 5.310  | 1.00 | 14.93 | O |
| ATOM | 1382 | N   | HIS A 197 | 25.315 | -4.403 | 3.817  | 1.00 | 15.23 | N |
| ATOM | 1383 | CA  | HIS A 197 | 26.093 | -3.461 | 4.636  | 1.00 | 16.61 | C |
| ATOM | 1384 | CB  | HIS A 197 | 27.448 | -3.171 | 3.997  | 1.00 | 21.44 | C |
| ATOM | 1385 | CG  | HIS A 197 | 28.442 | -4.271 | 4.174  | 1.00 | 28.97 | C |
| ATOM | 1386 | ND1 | HIS A 197 | 28.507 | -5.356 | 3.326  | 1.00 | 33.80 | N |
| ATOM | 1387 | CE1 | HIS A 197 | 29.472 | -6.165 | 3.727  | 1.00 | 39.47 | C |
| ATOM | 1388 | NE2 | HIS A 197 | 30.038 | -5.641 | 4.799  | 1.00 | 26.44 | N |
| ATOM | 1389 | CD2 | HIS A 197 | 29.409 | -4.458 | 5.104  | 1.00 | 32.44 | C |
| ATOM | 1390 | C   | HIS A 197 | 25.358 | -2.129 | 4.801  | 1.00 | 16.57 | C |
| ATOM | 1391 | O   | HIS A 197 | 24.723 | -1.649 | 3.868  | 1.00 | 18.72 | O |
| ATOM | 1392 | N   | TYR A 198 | 25.430 | -1.546 | 5.993  | 1.00 | 13.42 | N |
| ATOM | 1393 | CA  | TYR A 198 | 24.920 | -0.188 | 6.200  | 1.00 | 14.18 | C |
| ATOM | 1394 | CB  | TYR A 198 | 23.437 | -0.184 | 6.596  | 1.00 | 14.48 | C |
| ATOM | 1395 | CG  | TYR A 198 | 23.103 | -0.947 | 7.858  | 1.00 | 16.99 | C |
| ATOM | 1396 | CD1 | TYR A 198 | 23.030 | -0.296 | 9.091  | 1.00 | 19.00 | C |
| ATOM | 1397 | CE1 | TYR A 198 | 22.702 | -0.994 | 10.252 | 1.00 | 22.20 | C |
| ATOM | 1398 | CZ  | TYR A 198 | 22.432 | -2.359 | 10.175 | 1.00 | 26.85 | C |
| ATOM | 1399 | OH  | TYR A 198 | 22.098 | -3.064 | 11.307 | 1.00 | 27.91 | O |
| ATOM | 1400 | CE2 | TYR A 198 | 22.487 | -3.023 | 8.961  | 1.00 | 22.52 | C |
| ATOM | 1401 | CD2 | TYR A 198 | 22.815 | -2.315 | 7.811  | 1.00 | 20.00 | C |
| ATOM | 1402 | C   | TYR A 198 | 25.756 | 0.554  | 7.222  | 1.00 | 17.73 | C |
| ATOM | 1403 | O   | TYR A 198 | 26.511 | -0.069 | 7.989  | 1.00 | 16.79 | O |
| ATOM | 1404 | N   | ASP A 199 | 25.655 | 1.879  | 7.197  | 1.00 | 15.23 | N |
| ATOM | 1405 | CA  | ASP A 199 | 26.236 | 2.720  | 8.243  | 1.00 | 16.10 | C |
| ATOM | 1406 | CB  | ASP A 199 | 27.605 | 3.282  | 7.814  | 1.00 | 18.94 | C |
| ATOM | 1407 | CG  | ASP A 199 | 27.542 | 4.164  | 6.553  | 1.00 | 24.62 | C |
| ATOM | 1408 | OD1 | ASP A 199 | 26.455 | 4.629  | 6.139  | 1.00 | 19.27 | O |
| ATOM | 1409 | OD2 | ASP A 199 | 28.621 | 4.414  | 5.979  | 1.00 | 29.26 | O |

|      |      |     |           |        |        |        |      |       |   |
|------|------|-----|-----------|--------|--------|--------|------|-------|---|
| ATOM | 1410 | C   | ASP A 199 | 25.237 | 3.801  | 8.639  | 1.00 | 16.27 | C |
| ATOM | 1411 | O   | ASP A 199 | 24.018 | 3.579  | 8.521  | 1.00 | 14.45 | O |
| ATOM | 1412 | N   | GLY A 200 | 25.739 | 4.959  | 9.083  | 1.00 | 14.80 | N |
| ATOM | 1413 | CA  | GLY A 200 | 24.901 | 6.050  | 9.562  | 1.00 | 16.54 | C |
| ATOM | 1414 | C   | GLY A 200 | 23.942 | 6.576  | 8.515  | 1.00 | 13.85 | C |
| ATOM | 1415 | O   | GLY A 200 | 22.933 | 7.189  | 8.855  | 1.00 | 13.75 | O |
| ATOM | 1416 | N   | LYS A 201 | 24.246 | 6.323  | 7.237  | 1.00 | 11.60 | N |
| ATOM | 1417 | CA  | LYS A 201 | 23.383 | 6.776  | 6.151  | 1.00 | 11.78 | C |
| ATOM | 1418 | CB  | LYS A 201 | 24.026 | 6.552  | 4.796  | 1.00 | 12.05 | C |
| ATOM | 1419 | CG  | LYS A 201 | 25.051 | 7.613  | 4.435  | 1.00 | 17.76 | C |
| ATOM | 1420 | CD  | LYS A 201 | 25.257 | 7.551  | 2.942  | 1.00 | 15.42 | C |
| ATOM | 1421 | CE  | LYS A 201 | 26.364 | 8.460  | 2.480  | 1.00 | 16.48 | C |
| ATOM | 1422 | NZ  | LYS A 201 | 26.572 | 8.231  | 1.034  | 1.00 | 14.61 | N |
| ATOM | 1423 | C   | LYS A 201 | 22.031 | 6.070  | 6.217  | 1.00 | 10.94 | C |
| ATOM | 1424 | O   | LYS A 201 | 21.051 | 6.595  | 5.688  | 1.00 | 10.13 | O |
| ATOM | 1425 | N   | ALA A 202 | 21.978 | 4.914  | 6.888  | 1.00 | 10.45 | N |
| ATOM | 1426 | CA  | ALA A 202 | 20.684 | 4.249  | 7.112  | 1.00 | 10.06 | C |
| ATOM | 1427 | CB  | ALA A 202 | 20.864 | 2.861  | 7.713  | 1.00 | 10.79 | C |
| ATOM | 1428 | C   | ALA A 202 | 19.733 | 5.116  | 7.966  | 1.00 | 10.70 | C |
| ATOM | 1429 | O   | ALA A 202 | 18.535 | 5.198  | 7.655  | 1.00 | 9.53  | O |
| ATOM | 1430 | N   | ASP A 203 | 20.261 | 5.795  | 8.994  | 1.00 | 8.55  | N |
| ATOM | 1431 | CA  | ASP A 203 | 19.455 | 6.763  | 9.770  | 1.00 | 9.80  | C |
| ATOM | 1432 | CB  | ASP A 203 | 20.222 | 7.279  | 10.992 | 1.00 | 10.51 | C |
| ATOM | 1433 | CG  | ASP A 203 | 20.304 | 6.267  | 12.135 | 1.00 | 14.63 | C |
| ATOM | 1434 | OD1 | ASP A 203 | 19.529 | 5.282  | 12.193 | 1.00 | 11.63 | O |
| ATOM | 1435 | OD2 | ASP A 203 | 21.175 | 6.477  | 13.014 | 1.00 | 14.87 | O |
| ATOM | 1436 | C   | ASP A 203 | 18.984 | 7.960  | 8.925  | 1.00 | 9.61  | C |
| ATOM | 1437 | O   | ASP A 203 | 17.879 | 8.488  | 9.139  | 1.00 | 10.60 | O |
| ATOM | 1438 | N   | LEU A 204 | 19.812 | 8.396  | 7.977  | 1.00 | 9.67  | N |
| ATOM | 1439 | CA  | LEU A 204 | 19.439 | 9.506  | 7.083  | 1.00 | 10.05 | C |
| ATOM | 1440 | CB  | LEU A 204 | 20.637 | 9.959  | 6.241  | 1.00 | 12.18 | C |
| ATOM | 1441 | CG  | LEU A 204 | 21.765 | 10.612 | 7.067  | 1.00 | 12.87 | C |
| ATOM | 1442 | CD1 | LEU A 204 | 22.923 | 11.015 | 6.167  | 1.00 | 10.20 | C |
| ATOM | 1443 | CD2 | LEU A 204 | 21.263 | 11.814 | 7.864  | 1.00 | 12.89 | C |
| ATOM | 1444 | C   | LEU A 204 | 18.196 | 9.190  | 6.211  | 1.00 | 9.72  | C |
| ATOM | 1445 | O   | LEU A 204 | 17.311 | 10.052 | 6.045  | 1.00 | 9.52  | O |
| ATOM | 1446 | N   | TRP A 205 | 18.136 | 7.959  | 5.697  | 1.00 | 10.06 | N |
| ATOM | 1447 | CA  | TRP A 205 | 16.955 | 7.442  | 5.003  | 1.00 | 9.09  | C |
| ATOM | 1448 | CB  | TRP A 205 | 17.156 | 5.994  | 4.552  | 1.00 | 9.01  | C |
| ATOM | 1449 | CG  | TRP A 205 | 15.879 | 5.388  | 3.982  | 1.00 | 7.60  | C |
| ATOM | 1450 | CD1 | TRP A 205 | 14.857 | 4.793  | 4.681  | 1.00 | 8.45  | C |
| ATOM | 1451 | NE1 | TRP A 205 | 13.887 | 4.363  | 3.813  | 1.00 | 8.23  | N |

|      |      |               |        |        |        |      |       |   |
|------|------|---------------|--------|--------|--------|------|-------|---|
| ATOM | 1452 | CE2 TRP A 205 | 14.255 | 4.681  | 2.533  | 1.00 | 8.32  | C |
| ATOM | 1453 | CD2 TRP A 205 | 15.509 | 5.330  | 2.602  | 1.00 | 7.87  | C |
| ATOM | 1454 | CE3 TRP A 205 | 16.121 | 5.754  | 1.409  | 1.00 | 8.45  | C |
| ATOM | 1455 | CZ3 TRP A 205 | 15.476 | 5.517  | 0.197  | 1.00 | 8.05  | C |
| ATOM | 1456 | CH2 TRP A 205 | 14.209 | 4.881  | 0.164  | 1.00 | 10.63 | C |
| ATOM | 1457 | CZ2 TRP A 205 | 13.594 | 4.454  | 1.319  | 1.00 | 8.99  | C |
| ATOM | 1458 | C TRP A 205   | 15.735 | 7.512  | 5.928  | 1.00 | 8.05  | C |
| ATOM | 1459 | O TRP A 205   | 14.679 | 8.039  | 5.532  | 1.00 | 7.72  | O |
| ATOM | 1460 | N SER A 206   | 15.883 | 7.004  | 7.154  | 1.00 | 7.72  | N |
| ATOM | 1461 | CA SER A 206  | 14.768 | 7.011  | 8.117  | 1.00 | 8.00  | C |
| ATOM | 1462 | CB SER A 206  | 15.168 | 6.407  | 9.454  | 1.00 | 9.04  | C |
| ATOM | 1463 | OG SER A 206  | 15.652 | 5.095  | 9.281  | 1.00 | 8.43  | O |
| ATOM | 1464 | C SER A 206   | 14.264 | 8.428  | 8.323  | 1.00 | 7.86  | C |
| ATOM | 1465 | O SER A 206   | 13.060 | 8.674  | 8.303  | 1.00 | 7.98  | O |
| ATOM | 1466 | N ILE A 207   | 15.205 | 9.361  | 8.490  | 1.00 | 8.32  | N |
| ATOM | 1467 | CA AILE A 207 | 14.876 | 10.776 | 8.662  | 0.50 | 8.15  | C |
| ATOM | 1468 | CA BILE A 207 | 14.863 | 10.771 | 8.665  | 0.50 | 8.81  | C |
| ATOM | 1469 | CB AILE A 207 | 16.149 | 11.602 | 8.993  | 0.50 | 8.49  | C |
| ATOM | 1470 | CB BILE A 207 | 16.112 | 11.609 | 9.038  | 0.50 | 10.15 | C |
| ATOM | 1471 | CG1AILE A 207 | 16.620 | 11.283 | 10.417 | 0.50 | 8.48  | C |
| ATOM | 1472 | CG1BILE A 207 | 16.576 | 11.234 | 10.446 | 0.50 | 11.02 | C |
| ATOM | 1473 | CD1AILE A 207 | 18.012 | 11.802 | 10.731 | 0.50 | 8.52  | C |
| ATOM | 1474 | CD1BILE A 207 | 15.476 | 11.302 | 11.480 | 0.50 | 15.11 | C |
| ATOM | 1475 | CG2AILE A 207 | 15.877 | 13.092 | 8.884  | 0.50 | 9.13  | C |
| ATOM | 1476 | CG2BILE A 207 | 15.799 | 13.093 | 9.020  | 0.50 | 10.53 | C |
| ATOM | 1477 | C ILE A 207   | 14.116 | 11.295 | 7.430  | 1.00 | 9.13  | C |
| ATOM | 1478 | O ILE A 207   | 13.066 | 11.962 | 7.559  | 1.00 | 8.49  | O |
| ATOM | 1479 | N GLY A 208   | 14.619 | 10.968 | 6.241  | 1.00 | 8.77  | N |
| ATOM | 1480 | CA GLY A 208  | 13.936 | 11.330 | 4.988  | 1.00 | 8.09  | C |
| ATOM | 1481 | C GLY A 208   | 12.499 | 10.822 | 4.958  | 1.00 | 8.68  | C |
| ATOM | 1482 | O GLY A 208   | 11.584 | 11.551 | 4.540  | 1.00 | 7.53  | O |
| ATOM | 1483 | N THR A 209   | 12.290 | 9.591  | 5.421  | 1.00 | 6.90  | N |
| ATOM | 1484 | CA THR A 209  | 10.923 | 9.023  | 5.395  | 1.00 | 7.30  | C |
| ATOM | 1485 | CB THR A 209  | 10.863 | 7.490  | 5.649  | 1.00 | 7.91  | C |
| ATOM | 1486 | OG1 THR A 209 | 11.290 | 7.167  | 6.973  | 1.00 | 10.16 | O |
| ATOM | 1487 | CG2 THR A 209 | 11.724 | 6.746  | 4.645  | 1.00 | 6.23  | C |
| ATOM | 1488 | C THR A 209   | 10.004 | 9.760  | 6.367  | 1.00 | 8.00  | C |
| ATOM | 1489 | O THR A 209   | 8.840  | 10.002 | 6.056  | 1.00 | 7.27  | O |
| ATOM | 1490 | N ILE A 210   | 10.554 | 10.115 | 7.528  | 1.00 | 7.10  | N |
| ATOM | 1491 | CA ILE A 210  | 9.829  | 10.835 | 8.566  | 1.00 | 7.94  | C |
| ATOM | 1492 | CB ILE A 210  | 10.643 | 10.868 | 9.887  | 1.00 | 8.25  | C |
| ATOM | 1493 | CG1 ILE A 210 | 10.719 | 9.448  | 10.480 | 1.00 | 11.25 | C |

|      |      |               |        |        |        |      |       |   |
|------|------|---------------|--------|--------|--------|------|-------|---|
| ATOM | 1494 | CD1 ILE A 210 | 11.816 | 9.285  | 11.516 | 1.00 | 10.81 | C |
| ATOM | 1495 | CG2 ILE A 210 | 9.973  | 11.821 | 10.881 | 1.00 | 10.08 | C |
| ATOM | 1496 | C ILE A 210   | 9.458  | 12.243 | 8.083  | 1.00 | 7.01  | C |
| ATOM | 1497 | O ILE A 210   | 8.291  | 12.689 | 8.227  | 1.00 | 7.17  | O |
| ATOM | 1498 | N VAL A 211   | 10.439 | 12.937 | 7.496  | 1.00 | 8.01  | N |
| ATOM | 1499 | CA VAL A 211  | 10.214 | 14.265 | 6.900  | 1.00 | 7.18  | C |
| ATOM | 1500 | CB VAL A 211  | 11.533 | 14.900 | 6.386  | 1.00 | 7.94  | C |
| ATOM | 1501 | CG1 VAL A 211 | 11.277 | 16.205 | 5.638  | 1.00 | 8.47  | C |
| ATOM | 1502 | CG2 VAL A 211 | 12.456 | 15.176 | 7.577  | 1.00 | 7.14  | C |
| ATOM | 1503 | C VAL A 211   | 9.125  | 14.210 | 5.819  | 1.00 | 8.00  | C |
| ATOM | 1504 | O VAL A 211   | 8.215  | 15.055 | 5.802  | 1.00 | 6.87  | O |
| ATOM | 1505 | N TYR A 212   | 9.195  | 13.192 | 4.961  | 1.00 | 7.26  | N |
| ATOM | 1506 | CA TYR A 212  | 8.198  | 12.978 | 3.903  | 1.00 | 7.90  | C |
| ATOM | 1507 | CB TYR A 212  | 8.580  | 11.782 | 3.024  | 1.00 | 7.48  | C |
| ATOM | 1508 | CG TYR A 212  | 7.632  | 11.604 | 1.855  | 1.00 | 8.08  | C |
| ATOM | 1509 | CD1 TYR A 212 | 7.916  | 12.162 | 0.615  | 1.00 | 8.05  | C |
| ATOM | 1510 | CE1 TYR A 212 | 7.036  | 12.012 | -0.459 | 1.00 | 9.99  | C |
| ATOM | 1511 | CZ TYR A 212  | 5.846  | 11.308 | -0.275 | 1.00 | 8.75  | C |
| ATOM | 1512 | OH TYR A 212  | 4.980  | 11.157 | -1.358 | 1.00 | 11.84 | O |
| ATOM | 1513 | CE2 TYR A 212 | 5.543  | 10.753 | 0.944  | 1.00 | 8.71  | C |
| ATOM | 1514 | CD2 TYR A 212 | 6.434  | 10.895 | 2.009  | 1.00 | 8.01  | C |
| ATOM | 1515 | C TYR A 212   | 6.794  | 12.804 | 4.489  | 1.00 | 7.89  | C |
| ATOM | 1516 | O TYR A 212   | 5.825  | 13.396 | 3.984  | 1.00 | 8.87  | O |
| ATOM | 1517 | N GLN A 213   | 6.709  | 12.018 | 5.560  | 1.00 | 7.79  | N |
| ATOM | 1518 | CA GLN A 213  | 5.444  | 11.797 | 6.266  | 1.00 | 8.48  | C |
| ATOM | 1519 | CB GLN A 213  | 5.567  | 10.676 | 7.288  | 1.00 | 8.60  | C |
| ATOM | 1520 | CG GLN A 213  | 4.210  | 10.258 | 7.870  | 1.00 | 10.03 | C |
| ATOM | 1521 | CD GLN A 213  | 4.359  | 9.231  | 8.970  | 1.00 | 11.52 | C |
| ATOM | 1522 | OE1 GLN A 213 | 5.326  | 8.473  | 8.997  | 1.00 | 13.14 | O |
| ATOM | 1523 | NE2 GLN A 213 | 3.408  | 9.210  | 9.893  | 1.00 | 14.85 | N |
| ATOM | 1524 | C GLN A 213   | 4.908  | 13.069 | 6.917  | 1.00 | 8.52  | C |
| ATOM | 1525 | O GLN A 213   | 3.698  | 13.322 | 6.877  | 1.00 | 7.57  | O |
| ATOM | 1526 | N CYS A 214   | 5.794  | 13.890 | 7.476  | 1.00 | 7.33  | N |
| ATOM | 1527 | CA CYS A 214  | 5.350  | 15.172 | 8.051  | 1.00 | 8.63  | C |
| ATOM | 1528 | CB CYS A 214  | 6.511  | 15.922 | 8.698  | 1.00 | 8.75  | C |
| ATOM | 1529 | SG CYS A 214  | 7.105  | 15.177 | 10.217 | 1.00 | 10.60 | S |
| ATOM | 1530 | C CYS A 214   | 4.752  | 16.049 | 6.967  | 1.00 | 8.86  | C |
| ATOM | 1531 | O CYS A 214   | 3.749  | 16.740 | 7.205  | 1.00 | 9.93  | O |
| ATOM | 1532 | N LEU A 215   | 5.373  | 16.010 | 5.779  | 1.00 | 7.39  | N |
| ATOM | 1533 | CA LEU A 215  | 4.983  | 16.868 | 4.652  | 1.00 | 8.40  | C |
| ATOM | 1534 | CB LEU A 215  | 6.091  | 16.898 | 3.573  | 1.00 | 7.56  | C |
| ATOM | 1535 | CG LEU A 215  | 5.852  | 17.794 | 2.335  | 1.00 | 9.17  | C |

|      |      |               |        |        |        |      |       |   |
|------|------|---------------|--------|--------|--------|------|-------|---|
| ATOM | 1536 | CD1 LEU A 215 | 6.940  | 17.529 | 1.299  | 1.00 | 8.96  | C |
| ATOM | 1537 | CD2 LEU A 215 | 5.798  | 19.285 | 2.658  | 1.00 | 10.27 | C |
| ATOM | 1538 | C LEU A 215   | 3.653  | 16.445 | 4.020  | 1.00 | 8.86  | C |
| ATOM | 1539 | O LEU A 215   | 2.791  | 17.297 | 3.718  | 1.00 | 9.44  | O |
| ATOM | 1540 | N THR A 216   | 3.473  | 15.142 | 3.851  | 1.00 | 8.33  | N |
| ATOM | 1541 | CA THR A 216  | 2.365  | 14.625 | 3.037  | 1.00 | 9.72  | C |
| ATOM | 1542 | CB THR A 216  | 2.867  | 13.646 | 1.955  | 1.00 | 10.01 | C |
| ATOM | 1543 | OG1 THR A 216 | 3.378  | 12.480 | 2.601  | 1.00 | 10.68 | O |
| ATOM | 1544 | CG2 THR A 216 | 3.950  | 14.279 | 1.087  | 1.00 | 10.76 | C |
| ATOM | 1545 | C THR A 216   | 1.309  | 13.865 | 3.818  | 1.00 | 10.67 | C |
| ATOM | 1546 | O THR A 216   | 0.219  | 13.630 | 3.285  | 1.00 | 11.83 | O |
| ATOM | 1547 | N GLY A 217   | 1.637  | 13.449 | 5.043  | 1.00 | 10.88 | N |
| ATOM | 1548 | CA GLY A 217  | 0.742  | 12.592 | 5.845  | 1.00 | 12.15 | C |
| ATOM | 1549 | C GLY A 217   | 0.935  | 11.088 | 5.662  | 1.00 | 13.39 | C |
| ATOM | 1550 | O GLY A 217   | 0.299  | 10.290 | 6.351  | 1.00 | 16.31 | O |
| ATOM | 1551 | N LYS A 218   | 1.811  | 10.689 | 4.744  | 1.00 | 12.23 | N |
| ATOM | 1552 | CA LYS A 218  | 2.011  | 9.265  | 4.447  | 1.00 | 13.74 | C |
| ATOM | 1553 | CB LYS A 218  | 1.218  | 8.853  | 3.191  | 1.00 | 18.23 | C |
| ATOM | 1554 | CG LYS A 218  | 1.521  | 9.648  | 1.932  | 1.00 | 24.14 | C |
| ATOM | 1555 | CD LYS A 218  | 0.415  | 9.529  | 0.880  | 1.00 | 35.83 | C |
| ATOM | 1556 | CE LYS A 218  | -0.741 | 10.484 | 1.138  | 1.00 | 42.39 | C |
| ATOM | 1557 | NZ LYS A 218  | -1.649 | 10.619 | -0.037 | 1.00 | 48.34 | N |
| ATOM | 1558 | C LYS A 218   | 3.488  | 8.944  | 4.277  | 1.00 | 13.02 | C |
| ATOM | 1559 | O LYS A 218   | 4.272  | 9.827  | 3.969  | 1.00 | 9.64  | O |
| ATOM | 1560 | N ALA A 219   | 3.851  | 7.682  | 4.461  | 1.00 | 16.70 | N |
| ATOM | 1561 | CA ALA A 219  | 5.232  | 7.246  | 4.171  | 1.00 | 14.87 | C |
| ATOM | 1562 | CB ALA A 219  | 5.525  | 5.885  | 4.788  | 1.00 | 16.62 | C |
| ATOM | 1563 | C ALA A 219   | 5.435  | 7.234  | 2.654  | 1.00 | 12.94 | C |
| ATOM | 1564 | O ALA A 219   | 4.483  | 7.028  | 1.902  | 1.00 | 14.34 | O |
| ATOM | 1565 | N PRO A 220   | 6.673  | 7.484  | 2.181  | 1.00 | 11.50 | N |
| ATOM | 1566 | CA PRO A 220  | 6.879  | 7.560  | 0.731  | 1.00 | 11.13 | C |
| ATOM | 1567 | CB PRO A 220  | 8.320  | 8.099  | 0.603  | 1.00 | 11.28 | C |
| ATOM | 1568 | CG PRO A 220  | 8.986  | 7.704  | 1.887  | 1.00 | 10.68 | C |
| ATOM | 1569 | CD PRO A 220  | 7.897  | 7.846  | 2.929  | 1.00 | 11.81 | C |
| ATOM | 1570 | C PRO A 220   | 6.741  | 6.250  | -0.038 | 1.00 | 12.34 | C |
| ATOM | 1571 | O PRO A 220   | 6.375  | 6.285  | -1.207 | 1.00 | 12.32 | O |
| ATOM | 1572 | N PHE A 221   | 7.073  | 5.132  | 0.606  | 1.00 | 13.67 | N |
| ATOM | 1573 | CA PHE A 221  | 7.031  | 3.812  | -0.026 | 1.00 | 14.62 | C |
| ATOM | 1574 | CB PHE A 221  | 8.454  | 3.295  | -0.335 | 1.00 | 12.76 | C |
| ATOM | 1575 | CG PHE A 221  | 9.311  | 4.302  | -1.038 | 1.00 | 12.41 | C |
| ATOM | 1576 | CD1 PHE A 221 | 9.147  | 4.552  | -2.400 | 1.00 | 11.86 | C |
| ATOM | 1577 | CE1 PHE A 221 | 9.923  | 5.503  | -3.046 | 1.00 | 12.99 | C |

|      |      |     |           |        |         |        |      |       |   |
|------|------|-----|-----------|--------|---------|--------|------|-------|---|
| ATOM | 1578 | CZ  | PHE A 221 | 10.871 | 6.226   | -2.328 | 1.00 | 11.45 | C |
| ATOM | 1579 | CE2 | PHE A 221 | 11.047 | 5.989   | -0.977 | 1.00 | 11.62 | C |
| ATOM | 1580 | CD2 | PHE A 221 | 10.271 | 5.034   | -0.325 | 1.00 | 11.17 | C |
| ATOM | 1581 | C   | PHE A 221 | 6.309  | 2.868   | 0.917  | 1.00 | 18.72 | C |
| ATOM | 1582 | O   | PHE A 221 | 6.692  | 2.705   | 2.081  | 1.00 | 21.93 | O |
| ATOM | 1583 | N   | GLN A 222 | 5.228  | 2.285   | 0.427  | 1.00 | 23.95 | N |
| ATOM | 1584 | CA  | GLN A 222 | 4.478  | 1.347   | 1.244  | 1.00 | 28.67 | C |
| ATOM | 1585 | CB  | GLN A 222 | 3.181  | 1.976   | 1.790  | 1.00 | 28.49 | C |
| ATOM | 1586 | CG  | GLN A 222 | 3.431  | 3.077   | 2.821  | 1.00 | 35.91 | C |
| ATOM | 1587 | CD  | GLN A 222 | 2.167  | 3.619   | 3.458  | 1.00 | 34.24 | C |
| ATOM | 1588 | OE1 | GLN A 222 | 1.374  | 2.870   | 4.029  | 1.00 | 35.64 | O |
| ATOM | 1589 | NE2 | GLN A 222 | 1.987  | 4.937   | 3.388  | 1.00 | 34.65 | N |
| ATOM | 1590 | C   | GLN A 222 | 4.219  | 0.084   | 0.454  | 1.00 | 19.40 | C |
| ATOM | 1591 | O   | GLN A 222 | 4.256  | 0.081   | -0.776 | 1.00 | 19.57 | O |
| ATOM | 1592 | N   | ALA A 223 | 4.024  | -0.995  | 1.192  | 1.00 | 21.40 | N |
| ATOM | 1593 | CA  | ALA A 223 | 3.729  | -2.287  | 0.615  | 1.00 | 18.86 | C |
| ATOM | 1594 | CB  | ALA A 223 | 5.014  | -3.072  | 0.408  | 1.00 | 19.92 | C |
| ATOM | 1595 | C   | ALA A 223 | 2.789  | -3.008  | 1.562  | 1.00 | 20.31 | C |
| ATOM | 1596 | O   | ALA A 223 | 2.568  | -2.566  | 2.701  | 1.00 | 20.93 | O |
| ATOM | 1597 | N   | ALA A 224 | 2.250  | -4.126  | 1.084  | 1.00 | 19.50 | N |
| ATOM | 1598 | CA  | ALA A 224 | 1.233  | -4.882  | 1.796  | 1.00 | 21.86 | C |
| ATOM | 1599 | CB  | ALA A 224 | 0.553  | -5.832  | 0.822  | 1.00 | 19.91 | C |
| ATOM | 1600 | C   | ALA A 224 | 1.776  | -5.644  | 3.017  | 1.00 | 23.06 | C |
| ATOM | 1601 | O   | ALA A 224 | 1.001  | -6.074  | 3.869  | 1.00 | 22.03 | O |
| ATOM | 1602 | N   | SER A 225 | 3.105  | -5.794  | 3.088  | 1.00 | 17.46 | N |
| ATOM | 1603 | CA  | SER A 225 | 3.798  | -6.580  | 4.113  | 1.00 | 18.02 | C |
| ATOM | 1604 | CB  | SER A 225 | 3.631  | -8.093  | 3.852  | 1.00 | 17.08 | C |
| ATOM | 1605 | OG  | SER A 225 | 4.380  | -8.548  | 2.728  | 1.00 | 16.34 | O |
| ATOM | 1606 | C   | SER A 225 | 5.288  | -6.224  | 4.096  | 1.00 | 18.79 | C |
| ATOM | 1607 | O   | SER A 225 | 5.771  | -5.726  | 3.072  | 1.00 | 15.52 | O |
| ATOM | 1608 | N   | PRO A 226 | 6.025  | -6.500  | 5.205  | 1.00 | 20.48 | N |
| ATOM | 1609 | CA  | PRO A 226 | 7.498  | -6.363  | 5.212  | 1.00 | 20.30 | C |
| ATOM | 1610 | CB  | PRO A 226 | 7.887  | -6.938  | 6.574  | 1.00 | 18.37 | C |
| ATOM | 1611 | CG  | PRO A 226 | 6.727  | -6.592  | 7.436  | 1.00 | 20.53 | C |
| ATOM | 1612 | CD  | PRO A 226 | 5.525  | -6.828  | 6.556  | 1.00 | 19.18 | C |
| ATOM | 1613 | C   | PRO A 226 | 8.190  | -7.154  | 4.095  | 1.00 | 18.54 | C |
| ATOM | 1614 | O   | PRO A 226 | 9.156  | -6.667  | 3.495  | 1.00 | 16.32 | O |
| ATOM | 1615 | N   | GLN A 227 | 7.683  | -8.349  | 3.809  | 1.00 | 17.04 | N |
| ATOM | 1616 | CA  | GLN A 227 | 8.206  | -9.176  | 2.722  | 1.00 | 19.81 | C |
| ATOM | 1617 | CB  | GLN A 227 | 7.597  | -10.589 | 2.774  | 1.00 | 23.78 | C |
| ATOM | 1618 | CG  | GLN A 227 | 7.809  | -11.327 | 4.101  | 1.00 | 36.34 | C |
| ATOM | 1619 | CD  | GLN A 227 | 6.552  | -11.400 | 4.975  | 1.00 | 44.02 | C |

|      |      |     |     |   |     |        |         |        |      |       |   |
|------|------|-----|-----|---|-----|--------|---------|--------|------|-------|---|
| ATOM | 1620 | OE1 | GLN | A | 227 | 6.099  | -10.403 | 5.557  | 1.00 | 21.15 | O |
| ATOM | 1621 | NE2 | GLN | A | 227 | 5.993  | -12.603 | 5.085  | 1.00 | 64.02 | N |
| ATOM | 1622 | C   | GLN | A | 227 | 7.995  | -8.510  | 1.345  | 1.00 | 17.40 | C |
| ATOM | 1623 | O   | GLN | A | 227 | 8.907  | -8.507  | 0.493  | 1.00 | 15.40 | O |
| ATOM | 1624 | N   | ASP | A | 228 | 6.809  | -7.932  | 1.136  | 1.00 | 17.04 | N |
| ATOM | 1625 | CA  | ASP | A | 228 | 6.526  | -7.214  | -0.111 | 1.00 | 15.54 | C |
| ATOM | 1626 | CB  | ASP | A | 228 | 5.040  | -6.904  | -0.267 | 1.00 | 17.96 | C |
| ATOM | 1627 | CG  | ASP | A | 228 | 4.206  | -8.156  | -0.527 | 1.00 | 26.70 | C |
| ATOM | 1628 | OD1 | ASP | A | 228 | 4.645  | -9.041  | -1.290 | 1.00 | 26.00 | O |
| ATOM | 1629 | OD2 | ASP | A | 228 | 3.116  | -8.254  | 0.051  | 1.00 | 29.18 | O |
| ATOM | 1630 | C   | ASP | A | 228 | 7.345  | -5.933  | -0.246 | 1.00 | 13.24 | C |
| ATOM | 1631 | O   | ASP | A | 228 | 7.684  | -5.545  | -1.359 | 1.00 | 12.18 | O |
| ATOM | 1632 | N   | LEU | A | 229 | 7.636  | -5.272  | 0.876  | 1.00 | 13.98 | N |
| ATOM | 1633 | CA  | LEU | A | 229 | 8.502  | -4.074  | 0.830  | 1.00 | 12.14 | C |
| ATOM | 1634 | CB  | LEU | A | 229 | 8.526  | -3.310  | 2.168  | 1.00 | 12.91 | C |
| ATOM | 1635 | CG  | LEU | A | 229 | 9.277  | -1.963  | 2.159  | 1.00 | 14.59 | C |
| ATOM | 1636 | CD1 | LEU | A | 229 | 8.538  | -0.915  | 1.345  | 1.00 | 14.98 | C |
| ATOM | 1637 | CD2 | LEU | A | 229 | 9.503  | -1.462  | 3.578  | 1.00 | 17.38 | C |
| ATOM | 1638 | C   | LEU | A | 229 | 9.909  | -4.482  | 0.400  | 1.00 | 13.20 | C |
| ATOM | 1639 | O   | LEU | A | 229 | 10.510 | -3.810  | -0.449 | 1.00 | 13.23 | O |
| ATOM | 1640 | N   | ARG | A | 230 | 10.421 | -5.586  | 0.962  | 1.00 | 12.27 | N |
| ATOM | 1641 | CA  | ARG | A | 230 | 11.735 | -6.090  | 0.545  | 1.00 | 13.77 | C |
| ATOM | 1642 | CB  | ARG | A | 230 | 12.175 | -7.318  | 1.351  | 1.00 | 13.70 | C |
| ATOM | 1643 | CG  | ARG | A | 230 | 13.514 | -7.871  | 0.868  | 1.00 | 18.61 | C |
| ATOM | 1644 | CD  | ARG | A | 230 | 14.184 | -8.783  | 1.874  | 1.00 | 27.60 | C |
| ATOM | 1645 | NE  | ARG | A | 230 | 15.448 | -9.285  | 1.331  | 1.00 | 26.96 | N |
| ATOM | 1646 | CZ  | ARG | A | 230 | 16.409 | -9.873  | 2.045  | 1.00 | 31.24 | C |
| ATOM | 1647 | NH1 | ARG | A | 230 | 16.284 | -10.028 | 3.355  | 1.00 | 31.44 | N |
| ATOM | 1648 | NH2 | ARG | A | 230 | 17.511 | -10.299 | 1.436  | 1.00 | 27.46 | N |
| ATOM | 1649 | C   | ARG | A | 230 | 11.753 | -6.375  | -0.963 | 1.00 | 15.79 | C |
| ATOM | 1650 | O   | ARG | A | 230 | 12.659 | -5.930  | -1.681 | 1.00 | 13.44 | O |
| ATOM | 1651 | N   | LEU | A | 231 | 10.740 | -7.097  | -1.450 | 1.00 | 13.71 | N |
| ATOM | 1652 | CA  | LEU | A | 231 | 10.634 | -7.366  | -2.885 | 1.00 | 13.35 | C |
| ATOM | 1653 | CB  | LEU | A | 231 | 9.418  | -8.242  | -3.186 | 1.00 | 15.24 | C |
| ATOM | 1654 | CG  | LEU | A | 231 | 9.484  | -9.674  | -2.657 | 1.00 | 22.49 | C |
| ATOM | 1655 | CD1 | LEU | A | 231 | 8.100  | -10.306 | -2.728 | 1.00 | 25.83 | C |
| ATOM | 1656 | CD2 | LEU | A | 231 | 10.504 | -10.500 | -3.435 | 1.00 | 25.33 | C |
| ATOM | 1657 | C   | LEU | A | 231 | 10.599 | -6.101  | -3.735 | 1.00 | 14.18 | C |
| ATOM | 1658 | O   | LEU | A | 231 | 11.220 | -6.054  | -4.796 | 1.00 | 14.77 | O |
| ATOM | 1659 | N   | PHE | A | 232 | 9.880  | -5.083  | -3.252 | 1.00 | 12.59 | N |
| ATOM | 1660 | CA  | PHE | A | 232 | 9.796  | -3.798  | -3.928 | 1.00 | 11.76 | C |
| ATOM | 1661 | CB  | PHE | A | 232 | 8.772  | -2.889  | -3.229 | 1.00 | 12.31 | C |

|      |      |     |           |        |        |        |      |       |   |
|------|------|-----|-----------|--------|--------|--------|------|-------|---|
| ATOM | 1662 | CG  | PHE A 232 | 8.663  | -1.520 | -3.848 | 1.00 | 17.06 | C |
| ATOM | 1663 | CD1 | PHE A 232 | 8.092  | -1.348 | -5.114 | 1.00 | 18.67 | C |
| ATOM | 1664 | CE1 | PHE A 232 | 8.024  | -0.079 | -5.697 | 1.00 | 17.95 | C |
| ATOM | 1665 | CZ  | PHE A 232 | 8.521  | 1.025  | -5.009 | 1.00 | 18.94 | C |
| ATOM | 1666 | CE2 | PHE A 232 | 9.076  | 0.870  | -3.743 | 1.00 | 16.05 | C |
| ATOM | 1667 | CD2 | PHE A 232 | 9.158  | -0.399 | -3.174 | 1.00 | 19.76 | C |
| ATOM | 1668 | C   | PHE A 232 | 11.163 | -3.114 | -4.028 | 1.00 | 11.56 | C |
| ATOM | 1669 | O   | PHE A 232 | 11.529 | -2.630 | -5.097 | 1.00 | 12.23 | O |
| ATOM | 1670 | N   | TYR A 233 | 11.910 | -3.108 | -2.917 | 1.00 | 11.04 | N |
| ATOM | 1671 | CA  | TYR A 233 | 13.241 | -2.484 | -2.877 | 1.00 | 10.06 | C |
| ATOM | 1672 | CB  | TYR A 233 | 13.726 | -2.303 | -1.435 | 1.00 | 10.48 | C |
| ATOM | 1673 | CG  | TYR A 233 | 13.030 | -1.199 | -0.653 | 1.00 | 9.46  | C |
| ATOM | 1674 | CD1 | TYR A 233 | 12.247 | -0.234 | -1.300 | 1.00 | 10.62 | C |
| ATOM | 1675 | CE1 | TYR A 233 | 11.615 | 0.782  | -0.580 | 1.00 | 11.66 | C |
| ATOM | 1676 | CZ  | TYR A 233 | 11.786 | 0.855  | 0.806  | 1.00 | 10.69 | C |
| ATOM | 1677 | OH  | TYR A 233 | 11.168 | 1.867  | 1.520  | 1.00 | 9.62  | O |
| ATOM | 1678 | CE2 | TYR A 233 | 12.563 | -0.086 | 1.470  | 1.00 | 10.22 | C |
| ATOM | 1679 | CD2 | TYR A 233 | 13.178 | -1.108 | 0.741  | 1.00 | 10.13 | C |
| ATOM | 1680 | C   | TYR A 233 | 14.252 | -3.272 | -3.715 | 1.00 | 10.52 | C |
| ATOM | 1681 | O   | TYR A 233 | 15.095 | -2.676 | -4.380 | 1.00 | 12.19 | O |
| ATOM | 1682 | N   | GLU A 234 | 14.123 | -4.600 | -3.718 | 1.00 | 10.93 | N |
| ATOM | 1683 | CA  | GLU A 234 | 14.978 | -5.462 | -4.554 | 1.00 | 13.91 | C |
| ATOM | 1684 | CB  | GLU A 234 | 14.777 | -6.944 | -4.192 | 1.00 | 16.09 | C |
| ATOM | 1685 | CG  | GLU A 234 | 15.377 | -7.336 | -2.847 | 1.00 | 17.97 | C |
| ATOM | 1686 | CD  | GLU A 234 | 15.054 | -8.764 | -2.425 | 1.00 | 26.79 | C |
| ATOM | 1687 | OE1 | GLU A 234 | 14.107 | -9.363 | -2.970 | 1.00 | 28.17 | O |
| ATOM | 1688 | OE2 | GLU A 234 | 15.737 | -9.280 | -1.519 | 1.00 | 31.15 | O |
| ATOM | 1689 | C   | GLU A 234 | 14.763 | -5.232 | -6.055 | 1.00 | 13.77 | C |
| ATOM | 1690 | O   | GLU A 234 | 15.724 | -5.194 | -6.830 | 1.00 | 16.39 | O |
| ATOM | 1691 | N   | LYS A 235 | 13.507 | -5.074 | -6.463 | 1.00 | 15.03 | N |
| ATOM | 1692 | CA  | LYS A 235 | 13.159 | -4.956 | -7.875 | 1.00 | 14.90 | C |
| ATOM | 1693 | CB  | LYS A 235 | 11.686 | -5.331 | -8.089 | 1.00 | 15.47 | C |
| ATOM | 1694 | C   | LYS A 235 | 13.460 | -3.577 | -8.479 | 1.00 | 18.77 | C |
| ATOM | 1695 | O   | LYS A 235 | 13.807 | -3.471 | -9.663 | 1.00 | 24.21 | O |
| ATOM | 1696 | N   | ASN A 236 | 13.346 | -2.532 | -7.663 | 1.00 | 15.74 | N |
| ATOM | 1697 | CA  | ASN A 236 | 13.404 | -1.155 | -8.143 | 1.00 | 15.13 | C |
| ATOM | 1698 | CB  | ASN A 236 | 12.203 | -0.366 | -7.599 | 1.00 | 16.23 | C |
| ATOM | 1699 | CG  | ASN A 236 | 10.886 | -0.881 | -8.133 | 1.00 | 20.94 | C |
| ATOM | 1700 | OD1 | ASN A 236 | 10.424 | -0.432 | -9.180 | 1.00 | 32.50 | O |
| ATOM | 1701 | ND2 | ASN A 236 | 10.288 | -1.847 | -7.441 | 1.00 | 19.90 | N |
| ATOM | 1702 | C   | ASN A 236 | 14.712 | -0.505 | -7.739 | 1.00 | 16.18 | C |
| ATOM | 1703 | O   | ASN A 236 | 14.875 | -0.100 | -6.592 | 1.00 | 15.89 | O |



|      |      |     |           |        |        |         |      |       |   |
|------|------|-----|-----------|--------|--------|---------|------|-------|---|
| ATOM | 1704 | N   | LYS A 237 | 15.661 | -0.445 | -8.680  | 1.00 | 15.09 | N |
| ATOM | 1705 | CA  | LYS A 237 | 17.013 | 0.050  | -8.380  | 1.00 | 17.57 | C |
| ATOM | 1706 | CB  | LYS A 237 | 18.043 | -0.460 | -9.404  | 1.00 | 19.71 | C |
| ATOM | 1707 | CG  | LYS A 237 | 17.987 | -1.960 | -9.680  | 1.00 | 26.62 | C |
| ATOM | 1708 | CD  | LYS A 237 | 18.581 | -2.780 | -8.551  | 1.00 | 31.17 | C |
| ATOM | 1709 | CE  | LYS A 237 | 18.777 | -4.232 | -8.968  | 1.00 | 37.28 | C |
| ATOM | 1710 | NZ  | LYS A 237 | 17.498 | -4.995 | -8.923  | 1.00 | 34.31 | N |
| ATOM | 1711 | C   | LYS A 237 | 17.059 | 1.582  | -8.266  | 1.00 | 16.03 | C |
| ATOM | 1712 | O   | LYS A 237 | 18.034 | 2.136  | -7.759  | 1.00 | 15.65 | O |
| ATOM | 1713 | N   | THR A 238 | 15.992 | 2.249  | -8.712  | 1.00 | 15.84 | N |
| ATOM | 1714 | CA  | THR A 238 | 15.851 | 3.697  | -8.585  | 1.00 | 17.14 | C |
| ATOM | 1715 | CB  | THR A 238 | 15.897 | 4.403  | -9.963  | 1.00 | 17.43 | C |
| ATOM | 1716 | OG1 | THR A 238 | 17.133 | 4.094  | -10.619 | 1.00 | 20.13 | O |
| ATOM | 1717 | CG2 | THR A 238 | 15.777 | 5.930  | -9.816  | 1.00 | 19.61 | C |
| ATOM | 1718 | C   | THR A 238 | 14.526 | 3.976  | -7.881  | 1.00 | 16.71 | C |
| ATOM | 1719 | O   | THR A 238 | 13.453 | 3.671  | -8.416  | 1.00 | 17.56 | O |
| ATOM | 1720 | N   | LEU A 239 | 14.607 | 4.540  | -6.678  | 1.00 | 12.67 | N |
| ATOM | 1721 | CA  | LEU A 239 | 13.406 | 4.953  | -5.932  | 1.00 | 12.48 | C |
| ATOM | 1722 | CB  | LEU A 239 | 13.459 | 4.442  | -4.483  | 1.00 | 12.21 | C |
| ATOM | 1723 | CG  | LEU A 239 | 13.532 | 2.926  | -4.266  | 1.00 | 13.43 | C |
| ATOM | 1724 | CD1 | LEU A 239 | 13.771 | 2.636  | -2.793  | 1.00 | 13.52 | C |
| ATOM | 1725 | CD2 | LEU A 239 | 12.302 | 2.189  | -4.776  | 1.00 | 15.80 | C |
| ATOM | 1726 | C   | LEU A 239 | 13.280 | 6.471  | -5.951  | 1.00 | 13.16 | C |
| ATOM | 1727 | O   | LEU A 239 | 14.235 | 7.186  | -5.627  | 1.00 | 14.51 | O |
| ATOM | 1728 | N   | VAL A 240 | 12.112 | 6.968  | -6.351  | 1.00 | 12.93 | N |
| ATOM | 1729 | CA  | VAL A 240 | 11.868 | 8.406  | -6.359  | 1.00 | 13.19 | C |
| ATOM | 1730 | CB  | VAL A 240 | 11.775 | 9.029  | -7.785  | 1.00 | 13.73 | C |
| ATOM | 1731 | CG1 | VAL A 240 | 11.676 | 10.552 | -7.696  | 1.00 | 12.59 | C |
| ATOM | 1732 | CG2 | VAL A 240 | 12.974 | 8.661  | -8.648  | 1.00 | 16.46 | C |
| ATOM | 1733 | C   | VAL A 240 | 10.568 | 8.647  | -5.590  | 1.00 | 13.50 | C |
| ATOM | 1734 | O   | VAL A 240 | 9.508  | 8.157  | -5.999  | 1.00 | 15.68 | O |
| ATOM | 1735 | N   | PRO A 241 | 10.644 | 9.382  | -4.465  | 1.00 | 12.31 | N |
| ATOM | 1736 | CA  | PRO A 241 | 9.405  | 9.675  | -3.753  | 1.00 | 12.48 | C |
| ATOM | 1737 | CB  | PRO A 241 | 9.901  | 10.268 | -2.425  | 1.00 | 11.54 | C |
| ATOM | 1738 | CG  | PRO A 241 | 11.215 | 10.905 | -2.766  | 1.00 | 11.73 | C |
| ATOM | 1739 | CD  | PRO A 241 | 11.816 | 10.052 | -3.855  | 1.00 | 10.47 | C |
| ATOM | 1740 | C   | PRO A 241 | 8.570  | 10.675 | -4.569  | 1.00 | 13.26 | C |
| ATOM | 1741 | O   | PRO A 241 | 9.145  | 11.491 | -5.289  | 1.00 | 12.67 | O |
| ATOM | 1742 | N   | THR A 242 | 7.243  | 10.575 | -4.483  | 1.00 | 12.16 | N |
| ATOM | 1743 | CA  | THR A 242 | 6.346  | 11.509 | -5.177  | 1.00 | 14.21 | C |
| ATOM | 1744 | CB  | THR A 242 | 4.940  | 10.901 | -5.358  | 1.00 | 15.20 | C |
| ATOM | 1745 | OG1 | THR A 242 | 5.052  | 9.643  | -6.027  | 1.00 | 20.24 | O |

|      |      |               |        |        |         |      |       |   |
|------|------|---------------|--------|--------|---------|------|-------|---|
| ATOM | 1746 | CG2 THR A 242 | 4.061  | 11.825 | -6.195  | 1.00 | 19.46 | C |
| ATOM | 1747 | C THR A 242   | 6.225  | 12.785 | -4.335  | 1.00 | 12.78 | C |
| ATOM | 1748 | O THR A 242   | 5.535  | 12.791 | -3.327  | 1.00 | 15.70 | O |
| ATOM | 1749 | N ILE A 243   | 6.902  | 13.850 | -4.747  | 1.00 | 12.65 | N |
| ATOM | 1750 | CA ILE A 243  | 6.915  | 15.081 | -3.946  | 1.00 | 11.20 | C |
| ATOM | 1751 | CB ILE A 243  | 8.341  | 15.678 | -3.879  | 1.00 | 10.81 | C |
| ATOM | 1752 | CG1 ILE A 243 | 9.280  | 14.655 | -3.222  | 1.00 | 12.64 | C |
| ATOM | 1753 | CD1 ILE A 243 | 10.747 | 14.992 | -3.350  | 1.00 | 15.58 | C |
| ATOM | 1754 | CG2 ILE A 243 | 8.348  | 17.003 | -3.119  | 1.00 | 11.89 | C |
| ATOM | 1755 | C ILE A 243   | 5.929  | 16.064 | -4.571  | 1.00 | 11.50 | C |
| ATOM | 1756 | O ILE A 243   | 6.049  | 16.363 | -5.757  | 1.00 | 13.24 | O |
| ATOM | 1757 | N PRO A 244   | 4.963  | 16.578 | -3.778  | 1.00 | 10.99 | N |
| ATOM | 1758 | CA PRO A 244  | 3.954  | 17.485 | -4.335  | 1.00 | 13.87 | C |
| ATOM | 1759 | CB PRO A 244  | 3.196  | 17.959 | -3.094  | 1.00 | 12.11 | C |
| ATOM | 1760 | CG PRO A 244  | 3.321  | 16.834 | -2.130  | 1.00 | 12.88 | C |
| ATOM | 1761 | CD PRO A 244  | 4.718  | 16.298 | -2.348  | 1.00 | 11.58 | C |
| ATOM | 1762 | C PRO A 244   | 4.558  | 18.687 | -5.070  | 1.00 | 14.28 | C |
| ATOM | 1763 | O PRO A 244   | 5.633  | 19.170 | -4.694  | 1.00 | 12.77 | O |
| ATOM | 1764 | N ARG A 245   | 3.860  | 19.166 | -6.101  | 1.00 | 15.80 | N |
| ATOM | 1765 | CA ARG A 245  | 4.317  | 20.310 | -6.907  | 1.00 | 15.27 | C |
| ATOM | 1766 | CB ARG A 245  | 3.290  | 20.609 | -8.022  | 1.00 | 23.02 | C |
| ATOM | 1767 | CG ARG A 245  | 3.657  | 21.774 | -8.945  | 1.00 | 29.79 | C |
| ATOM | 1768 | CD ARG A 245  | 2.641  | 22.013 | -10.062 | 1.00 | 34.54 | C |
| ATOM | 1769 | NE ARG A 245  | 2.635  | 20.938 | -11.056 | 1.00 | 46.17 | N |
| ATOM | 1770 | CZ ARG A 245  | 3.458  | 20.849 | -12.103 | 1.00 | 42.95 | C |
| ATOM | 1771 | NH1 ARG A 245 | 4.386  | 21.774 | -12.331 | 1.00 | 47.84 | N |
| ATOM | 1772 | NH2 ARG A 245 | 3.351  | 19.817 | -12.930 | 1.00 | 46.31 | N |
| ATOM | 1773 | C ARG A 245   | 4.585  | 21.561 | -6.051  | 1.00 | 15.03 | C |
| ATOM | 1774 | O ARG A 245   | 5.525  | 22.310 | -6.306  | 1.00 | 16.39 | O |
| ATOM | 1775 | N GLU A 246   | 3.763  | 21.754 | -5.018  | 1.00 | 15.36 | N |
| ATOM | 1776 | CA GLU A 246  | 3.842  | 22.937 | -4.155  | 1.00 | 14.44 | C |
| ATOM | 1777 | CB GLU A 246  | 2.509  | 23.169 | -3.414  | 1.00 | 13.80 | C |
| ATOM | 1778 | CG GLU A 246  | 2.122  | 22.105 | -2.384  | 1.00 | 17.37 | C |
| ATOM | 1779 | CD GLU A 246  | 1.271  | 20.984 | -2.953  | 1.00 | 17.52 | C |
| ATOM | 1780 | OE1 GLU A 246 | 1.277  | 20.757 | -4.189  | 1.00 | 16.08 | O |
| ATOM | 1781 | OE2 GLU A 246 | 0.590  | 20.313 | -2.153  | 1.00 | 17.43 | O |
| ATOM | 1782 | C GLU A 246   | 5.008  | 22.960 | -3.167  | 1.00 | 13.39 | C |
| ATOM | 1783 | O GLU A 246   | 5.275  | 23.989 | -2.558  | 1.00 | 14.09 | O |
| ATOM | 1784 | N THR A 247   | 5.714  | 21.838 | -3.021  | 1.00 | 10.83 | N |
| ATOM | 1785 | CA THR A 247  | 6.862  | 21.764 | -2.110  | 1.00 | 10.79 | C |
| ATOM | 1786 | CB THR A 247  | 7.420  | 20.324 | -2.055  | 1.00 | 9.30  | C |
| ATOM | 1787 | OG1 THR A 247 | 6.343  | 19.398 | -1.868  | 1.00 | 10.07 | O |

|      |      |               |        |        |        |      |       |   |
|------|------|---------------|--------|--------|--------|------|-------|---|
| ATOM | 1788 | CG2 THR A 247 | 8.480  | 20.137 | -0.939 | 1.00 | 9.89  | C |
| ATOM | 1789 | C THR A 247   | 7.957  | 22.715 | -2.571 | 1.00 | 11.14 | C |
| ATOM | 1790 | O THR A 247   | 8.199  | 22.865 | -3.776 | 1.00 | 13.19 | O |
| ATOM | 1791 | N SER A 248   | 8.593  | 23.376 | -1.607 | 1.00 | 9.79  | N |
| ATOM | 1792 | CA SER A 248  | 9.661  | 24.337 | -1.902 | 1.00 | 10.58 | C |
| ATOM | 1793 | CB SER A 248  | 10.091 | 25.069 | -0.633 | 1.00 | 10.90 | C |
| ATOM | 1794 | OG SER A 248  | 10.870 | 24.256 | 0.232  | 1.00 | 11.16 | O |
| ATOM | 1795 | C SER A 248   | 10.855 | 23.619 | -2.530 | 1.00 | 11.29 | C |
| ATOM | 1796 | O SER A 248   | 11.073 | 22.425 | -2.273 | 1.00 | 11.56 | O |
| ATOM | 1797 | N ALA A 249   | 11.593 | 24.331 | -3.376 | 1.00 | 11.57 | N |
| ATOM | 1798 | CA ALA A 249  | 12.788 | 23.744 | -4.016 | 1.00 | 11.48 | C |
| ATOM | 1799 | CB ALA A 249  | 13.440 | 24.731 | -4.996 | 1.00 | 13.01 | C |
| ATOM | 1800 | C ALA A 249   | 13.815 | 23.147 | -3.026 | 1.00 | 13.29 | C |
| ATOM | 1801 | O ALA A 249   | 14.269 | 22.030 | -3.259 | 1.00 | 12.51 | O |
| ATOM | 1802 | N PRO A 250   | 14.177 | 23.861 | -1.925 | 1.00 | 11.45 | N |
| ATOM | 1803 | CA PRO A 250  | 15.152 | 23.255 | -0.989 | 1.00 | 11.93 | C |
| ATOM | 1804 | CB PRO A 250  | 15.360 | 24.358 | 0.073  | 1.00 | 12.58 | C |
| ATOM | 1805 | CG PRO A 250  | 15.033 | 25.619 | -0.663 | 1.00 | 13.56 | C |
| ATOM | 1806 | CD PRO A 250  | 13.847 | 25.241 | -1.500 | 1.00 | 12.90 | C |
| ATOM | 1807 | C PRO A 250   | 14.655 | 21.964 | -0.333 | 1.00 | 9.83  | C |
| ATOM | 1808 | O PRO A 250   | 15.426 | 21.012 | -0.196 | 1.00 | 9.71  | O |
| ATOM | 1809 | N LEU A 251   | 13.373 | 21.911 | 0.027  | 1.00 | 8.46  | N |
| ATOM | 1810 | CA LEU A 251  | 12.821 | 20.695 | 0.650  | 1.00 | 8.54  | C |
| ATOM | 1811 | CB LEU A 251  | 11.467 | 20.949 | 1.336  | 1.00 | 8.64  | C |
| ATOM | 1812 | CG LEU A 251  | 10.865 | 19.752 | 2.120  | 1.00 | 8.19  | C |
| ATOM | 1813 | CD1 LEU A 251 | 11.853 | 19.148 | 3.115  | 1.00 | 9.45  | C |
| ATOM | 1814 | CD2 LEU A 251 | 9.584  | 20.170 | 2.836  | 1.00 | 9.86  | C |
| ATOM | 1815 | C LEU A 251   | 12.748 | 19.543 | -0.342 | 1.00 | 7.66  | C |
| ATOM | 1816 | O LEU A 251   | 13.098 | 18.409 | 0.027  | 1.00 | 7.93  | O |
| ATOM | 1817 | N ARG A 252   | 12.335 | 19.843 | -1.583 | 1.00 | 8.17  | N |
| ATOM | 1818 | CA AARG A 252 | 12.315 | 18.854 | -2.661 | 0.50 | 7.65  | C |
| ATOM | 1819 | CA BARG A 252 | 12.312 | 18.854 | -2.660 | 0.50 | 8.00  | C |
| ATOM | 1820 | CB AARG A 252 | 11.823 | 19.479 | -3.976 | 0.50 | 8.44  | C |
| ATOM | 1821 | CB BARG A 252 | 11.805 | 19.474 | -3.975 | 0.50 | 9.59  | C |
| ATOM | 1822 | CG AARG A 252 | 11.778 | 18.505 | -5.153 | 0.50 | 8.84  | C |
| ATOM | 1823 | CG BARG A 252 | 11.770 | 18.501 | -5.155 | 0.50 | 10.93 | C |
| ATOM | 1824 | CD AARG A 252 | 11.345 | 19.208 | -6.430 | 0.50 | 8.92  | C |
| ATOM | 1825 | CD BARG A 252 | 11.198 | 19.143 | -6.411 | 0.50 | 12.09 | C |
| ATOM | 1826 | NE AARG A 252 | 10.146 | 20.013 | -6.190 | 0.50 | 9.93  | N |
| ATOM | 1827 | NE BARG A 252 | 9.785  | 19.483 | -6.238 | 0.50 | 14.50 | N |
| ATOM | 1828 | CZ AARG A 252 | 8.914  | 19.515 | -6.157 | 0.50 | 10.24 | C |
| ATOM | 1829 | CZ BARG A 252 | 9.326  | 20.701 | -5.958 | 0.50 | 14.86 | C |

|      |      |               |        |        |        |      |       |   |
|------|------|---------------|--------|--------|--------|------|-------|---|
| ATOM | 1830 | NH1AARG A 252 | 7.877  | 20.306 | -5.922 | 0.50 | 10.15 | N |
| ATOM | 1831 | NH1BARG A 252 | 8.024  | 20.892 | -5.809 | 0.50 | 15.43 | N |
| ATOM | 1832 | NH2AARG A 252 | 8.718  | 18.222 | -6.370 | 0.50 | 10.22 | N |
| ATOM | 1833 | NH2BARG A 252 | 10.158 | 21.731 | -5.832 | 0.50 | 17.77 | N |
| ATOM | 1834 | C ARG A 252   | 13.701 | 18.251 | -2.849 | 1.00 | 7.88  | C |
| ATOM | 1835 | O ARG A 252   | 13.849 | 17.034 | -2.939 | 1.00 | 7.73  | O |
| ATOM | 1836 | N GLN A 253   | 14.714 | 19.118 | -2.916 | 1.00 | 7.76  | N |
| ATOM | 1837 | CA GLN A 253  | 16.081 | 18.653 | -3.126 | 1.00 | 8.81  | C |
| ATOM | 1838 | CB GLN A 253  | 16.998 | 19.848 | -3.358 | 1.00 | 10.72 | C |
| ATOM | 1839 | CG GLN A 253  | 18.400 | 19.452 | -3.770 | 1.00 | 14.10 | C |
| ATOM | 1840 | CD GLN A 253  | 19.332 | 20.614 | -3.657 | 1.00 | 20.86 | C |
| ATOM | 1841 | OE1 GLN A 253 | 19.632 | 21.073 | -2.556 | 1.00 | 20.79 | O |
| ATOM | 1842 | NE2 GLN A 253 | 19.781 | 21.117 | -4.796 | 1.00 | 20.14 | N |
| ATOM | 1843 | C GLN A 253   | 16.569 | 17.782 | -1.975 | 1.00 | 9.12  | C |
| ATOM | 1844 | O GLN A 253   | 17.169 | 16.722 | -2.213 | 1.00 | 8.39  | O |
| ATOM | 1845 | N LEU A 254   | 16.279 | 18.213 | -0.746 | 1.00 | 7.32  | N |
| ATOM | 1846 | CA LEU A 254  | 16.660 | 17.468 | 0.453  | 1.00 | 8.23  | C |
| ATOM | 1847 | CB LEU A 254  | 16.293 | 18.241 | 1.725  | 1.00 | 8.39  | C |
| ATOM | 1848 | CG LEU A 254  | 16.591 | 17.576 | 3.084  | 1.00 | 10.50 | C |
| ATOM | 1849 | CD1 LEU A 254 | 18.066 | 17.221 | 3.266  | 1.00 | 13.93 | C |
| ATOM | 1850 | CD2 LEU A 254 | 16.146 | 18.481 | 4.226  | 1.00 | 14.86 | C |
| ATOM | 1851 | C LEU A 254   | 16.023 | 16.086 | 0.474  | 1.00 | 8.21  | C |
| ATOM | 1852 | O LEU A 254   | 16.705 | 15.094 | 0.730  | 1.00 | 7.93  | O |
| ATOM | 1853 | N LEU A 255   | 14.721 | 16.029 | 0.194  | 1.00 | 7.61  | N |
| ATOM | 1854 | CA LEU A 255  | 13.991 | 14.765 | 0.202  | 1.00 | 6.72  | C |
| ATOM | 1855 | CB LEU A 255  | 12.488 | 15.024 | 0.061  | 1.00 | 7.37  | C |
| ATOM | 1856 | CG LEU A 255  | 11.847 | 15.468 | 1.370  | 1.00 | 8.09  | C |
| ATOM | 1857 | CD1 LEU A 255 | 11.893 | 14.334 | 2.393  | 1.00 | 7.20  | C |
| ATOM | 1858 | CD2 LEU A 255 | 10.414 | 15.885 | 1.088  | 1.00 | 9.68  | C |
| ATOM | 1859 | C LEU A 255   | 14.495 | 13.802 | -0.874 | 1.00 | 7.17  | C |
| ATOM | 1860 | O LEU A 255   | 14.708 | 12.637 | -0.582 | 1.00 | 7.95  | O |
| ATOM | 1861 | N LEU A 256   | 14.745 | 14.308 | -2.086 | 1.00 | 7.34  | N |
| ATOM | 1862 | CA LEU A 256  | 15.312 | 13.471 | -3.151 | 1.00 | 8.29  | C |
| ATOM | 1863 | CB LEU A 256  | 15.392 | 14.239 | -4.479 | 1.00 | 9.01  | C |
| ATOM | 1864 | CG LEU A 256  | 14.019 | 14.512 | -5.135 | 1.00 | 8.79  | C |
| ATOM | 1865 | CD1 LEU A 256 | 14.178 | 15.448 | -6.336 | 1.00 | 10.66 | C |
| ATOM | 1866 | CD2 LEU A 256 | 13.276 | 13.222 | -5.498 | 1.00 | 11.95 | C |
| ATOM | 1867 | C LEU A 256   | 16.678 | 12.878 | -2.777 | 1.00 | 8.73  | C |
| ATOM | 1868 | O LEU A 256   | 16.971 | 11.735 | -3.112 | 1.00 | 9.80  | O |
| ATOM | 1869 | N ALA A 257   | 17.488 | 13.661 | -2.060 | 1.00 | 9.29  | N |
| ATOM | 1870 | CA ALA A 257  | 18.852 | 13.256 | -1.676 | 1.00 | 8.59  | C |
| ATOM | 1871 | CB ALA A 257  | 19.697 | 14.495 | -1.407 | 1.00 | 8.02  | C |

|      |      |     |           |        |        |        |      |       |   |
|------|------|-----|-----------|--------|--------|--------|------|-------|---|
| ATOM | 1872 | C   | ALA A 257 | 18.891 | 12.304 | -0.480 | 1.00 | 10.28 | C |
| ATOM | 1873 | O   | ALA A 257 | 19.786 | 11.428 | -0.380 | 1.00 | 6.39  | O |
| ATOM | 1874 | N   | LEU A 258 | 17.923 | 12.467 | 0.433  | 1.00 | 7.79  | N |
| ATOM | 1875 | CA  | LEU A 258 | 17.811 | 11.560 | 1.578  | 1.00 | 7.68  | C |
| ATOM | 1876 | CB  | LEU A 258 | 16.960 | 12.187 | 2.667  | 1.00 | 7.63  | C |
| ATOM | 1877 | CG  | LEU A 258 | 17.593 | 13.337 | 3.450  | 1.00 | 8.79  | C |
| ATOM | 1878 | CD1 | LEU A 258 | 16.551 | 13.934 | 4.389  | 1.00 | 8.62  | C |
| ATOM | 1879 | CD2 | LEU A 258 | 18.848 | 12.924 | 4.232  | 1.00 | 8.60  | C |
| ATOM | 1880 | C   | LEU A 258 | 17.215 | 10.233 | 1.137  | 1.00 | 8.51  | C |
| ATOM | 1881 | O   | LEU A 258 | 17.613 | 9.169  | 1.626  | 1.00 | 9.92  | O |
| ATOM | 1882 | N   | LEU A 259 | 16.278 | 10.301 | 0.198  | 1.00 | 8.33  | N |
| ATOM | 1883 | CA  | LEU A 259 | 15.560 | 9.098  | -0.246 | 1.00 | 8.46  | C |
| ATOM | 1884 | CB  | LEU A 259 | 14.049 | 9.369  | -0.373 | 1.00 | 8.68  | C |
| ATOM | 1885 | CG  | LEU A 259 | 13.418 | 9.719  | 0.983  | 1.00 | 8.04  | C |
| ATOM | 1886 | CD1 | LEU A 259 | 11.977 | 10.180 | 0.789  | 1.00 | 8.95  | C |
| ATOM | 1887 | CD2 | LEU A 259 | 13.482 | 8.584  | 1.997  | 1.00 | 9.33  | C |
| ATOM | 1888 | C   | LEU A 259 | 16.157 | 8.465  | -1.508 | 1.00 | 10.23 | C |
| ATOM | 1889 | O   | LEU A 259 | 15.446 | 8.101  | -2.463 | 1.00 | 11.05 | O |
| ATOM | 1890 | N   | GLN A 260 | 17.480 | 8.327  | -1.487 | 1.00 | 8.51  | N |
| ATOM | 1891 | CA  | GLN A 260 | 18.208 | 7.574  | -2.513 | 1.00 | 9.39  | C |
| ATOM | 1892 | CB  | GLN A 260 | 19.628 | 8.112  | -2.678 | 1.00 | 9.49  | C |
| ATOM | 1893 | CG  | GLN A 260 | 19.699 | 9.495  | -3.321 | 1.00 | 11.27 | C |
| ATOM | 1894 | CD  | GLN A 260 | 19.326 | 9.487  | -4.792 | 1.00 | 12.57 | C |
| ATOM | 1895 | OE1 | GLN A 260 | 19.698 | 8.574  | -5.542 | 1.00 | 12.28 | O |
| ATOM | 1896 | NE2 | GLN A 260 | 18.594 | 10.513 | -5.220 | 1.00 | 13.14 | N |
| ATOM | 1897 | C   | GLN A 260 | 18.294 | 6.120  | -2.103 | 1.00 | 8.44  | C |
| ATOM | 1898 | O   | GLN A 260 | 18.752 | 5.803  | -0.989 | 1.00 | 7.80  | O |
| ATOM | 1899 | N   | ARG A 261 | 17.859 | 5.240  | -3.000 | 1.00 | 8.86  | N |
| ATOM | 1900 | CA  | ARG A 261 | 17.818 | 3.789  | -2.724 | 1.00 | 10.29 | C |
| ATOM | 1901 | CB  | ARG A 261 | 17.270 | 3.043  | -3.937 | 1.00 | 13.15 | C |
| ATOM | 1902 | CG  | ARG A 261 | 17.029 | 1.575  | -3.658 | 1.00 | 16.72 | C |
| ATOM | 1903 | CD  | ARG A 261 | 17.743 | 0.767  | -4.699 | 1.00 | 19.05 | C |
| ATOM | 1904 | NE  | ARG A 261 | 17.370 | -0.643 | -4.705 | 1.00 | 13.77 | N |
| ATOM | 1905 | CZ  | ARG A 261 | 18.201 | -1.603 | -5.100 | 1.00 | 17.98 | C |
| ATOM | 1906 | NH1 | ARG A 261 | 17.811 | -2.874 | -5.115 | 1.00 | 12.74 | N |
| ATOM | 1907 | NH2 | ARG A 261 | 19.433 | -1.281 | -5.486 | 1.00 | 14.88 | N |
| ATOM | 1908 | C   | ARG A 261 | 19.213 | 3.231  | -2.391 | 1.00 | 9.76  | C |
| ATOM | 1909 | O   | ARG A 261 | 19.377 | 2.462  | -1.437 | 1.00 | 9.02  | O |
| ATOM | 1910 | N   | ASN A 262 | 20.193 | 3.649  | -3.183 | 1.00 | 9.61  | N |
| ATOM | 1911 | CA  | ASN A 262 | 21.582 | 3.170  | -3.058 | 1.00 | 11.09 | C |
| ATOM | 1912 | CB  | ASN A 262 | 22.204 | 3.031  | -4.459 | 1.00 | 10.87 | C |
| ATOM | 1913 | CG  | ASN A 262 | 21.401 | 2.101  | -5.345 | 1.00 | 13.16 | C |

|      |      |               |        |        |        |      |       |   |
|------|------|---------------|--------|--------|--------|------|-------|---|
| ATOM | 1914 | OD1 ASN A 262 | 21.135 | 0.961  | -4.970 | 1.00 | 14.67 | O |
| ATOM | 1915 | ND2 ASN A 262 | 20.980 | 2.591  | -6.505 | 1.00 | 15.03 | N |
| ATOM | 1916 | C ASN A 262   | 22.359 | 4.127  | -2.192 | 1.00 | 9.12  | C |
| ATOM | 1917 | O ASN A 262   | 22.460 | 5.307  | -2.537 | 1.00 | 9.46  | O |
| ATOM | 1918 | N HIS A 263   | 22.881 | 3.640  | -1.053 | 1.00 | 9.53  | N |
| ATOM | 1919 | CA HIS A 263  | 23.489 | 4.533  | -0.059 | 1.00 | 9.92  | C |
| ATOM | 1920 | CB HIS A 263  | 23.848 | 3.787  | 1.228  | 1.00 | 12.22 | C |
| ATOM | 1921 | CG HIS A 263  | 24.848 | 2.687  | 1.028  | 1.00 | 12.86 | C |
| ATOM | 1922 | ND1 HIS A 263 | 26.196 | 2.928  | 0.877  | 1.00 | 15.09 | N |
| ATOM | 1923 | CE1 HIS A 263 | 26.830 | 1.777  | 0.721  | 1.00 | 13.42 | C |
| ATOM | 1924 | NE2 HIS A 263 | 25.946 | 0.799  | 0.781  | 1.00 | 14.20 | N |
| ATOM | 1925 | CD2 HIS A 263 | 24.695 | 1.344  | 0.968  | 1.00 | 15.86 | C |
| ATOM | 1926 | C HIS A 263   | 24.701 | 5.306  | -0.614 | 1.00 | 10.20 | C |
| ATOM | 1927 | O HIS A 263   | 24.967 | 6.403  | -0.160 | 1.00 | 11.89 | O |
| ATOM | 1928 | N LYS A 264   | 25.392 | 4.755  | -1.620 | 1.00 | 12.01 | N |
| ATOM | 1929 | CA LYS A 264  | 26.498 | 5.493  | -2.275 | 1.00 | 12.29 | C |
| ATOM | 1930 | CB LYS A 264  | 27.184 | 4.663  | -3.377 | 1.00 | 13.43 | C |
| ATOM | 1931 | CG LYS A 264  | 26.409 | 4.517  | -4.681 | 1.00 | 13.23 | C |
| ATOM | 1932 | CD LYS A 264  | 27.317 | 4.014  | -5.799 | 1.00 | 15.92 | C |
| ATOM | 1933 | CE LYS A 264  | 26.560 | 3.802  | -7.099 | 1.00 | 20.32 | C |
| ATOM | 1934 | NZ LYS A 264  | 27.559 | 3.533  | -8.178 | 1.00 | 23.58 | N |
| ATOM | 1935 | C LYS A 264   | 26.045 | 6.848  | -2.839 | 1.00 | 11.83 | C |
| ATOM | 1936 | O LYS A 264   | 26.828 | 7.790  | -2.861 | 1.00 | 12.98 | O |
| ATOM | 1937 | N ASP A 265   | 24.786 | 6.918  | -3.271 | 1.00 | 9.92  | N |
| ATOM | 1938 | CA ASP A 265  | 24.185 | 8.116  | -3.873 | 1.00 | 12.18 | C |
| ATOM | 1939 | CB ASP A 265  | 23.157 | 7.705  | -4.929 | 1.00 | 13.10 | C |
| ATOM | 1940 | CG ASP A 265  | 23.745 | 6.866  | -6.041 | 1.00 | 19.96 | C |
| ATOM | 1941 | OD1 ASP A 265 | 24.857 | 7.171  | -6.496 | 1.00 | 18.80 | O |
| ATOM | 1942 | OD2 ASP A 265 | 23.074 | 5.902  | -6.461 | 1.00 | 21.83 | O |
| ATOM | 1943 | C ASP A 265   | 23.483 | 9.008  | -2.855 | 1.00 | 10.99 | C |
| ATOM | 1944 | O ASP A 265   | 23.148 | 10.162 | -3.157 | 1.00 | 11.38 | O |
| ATOM | 1945 | N ARG A 266   | 23.227 | 8.464  | -1.672 | 1.00 | 9.12  | N |
| ATOM | 1946 | CA ARG A 266  | 22.496 | 9.192  | -0.624 | 1.00 | 8.12  | C |
| ATOM | 1947 | CB ARG A 266  | 22.001 | 8.238  | 0.469  | 1.00 | 9.08  | C |
| ATOM | 1948 | CG ARG A 266  | 20.882 | 8.800  | 1.352  | 1.00 | 7.79  | C |
| ATOM | 1949 | CD ARG A 266  | 20.346 | 7.746  | 2.321  | 1.00 | 8.73  | C |
| ATOM | 1950 | NE ARG A 266  | 19.934 | 6.527  | 1.603  | 1.00 | 7.65  | N |
| ATOM | 1951 | CZ ARG A 266  | 20.141 | 5.272  | 2.026  | 1.00 | 7.05  | C |
| ATOM | 1952 | NH1 ARG A 266 | 19.775 | 4.257  | 1.245  | 1.00 | 8.38  | N |
| ATOM | 1953 | NH2 ARG A 266 | 20.701 | 5.013  | 3.215  | 1.00 | 6.90  | N |
| ATOM | 1954 | C ARG A 266   | 23.383 | 10.276 | -0.029 | 1.00 | 10.54 | C |
| ATOM | 1955 | O ARG A 266   | 24.585 | 10.077 | 0.154  | 1.00 | 11.54 | O |

|      |      |     |            |        |        |        |      |       |   |
|------|------|-----|------------|--------|--------|--------|------|-------|---|
| ATOM | 1956 | N   | MET A 267  | 22.783 | 11.425 | 0.242  | 1.00 | 7.71  | N |
| ATOM | 1957 | CA  | MET A 267  | 23.439 | 12.515 | 0.988  | 1.00 | 11.08 | C |
| ATOM | 1958 | CB  | MET A 267  | 22.341 | 13.498 | 1.403  | 1.00 | 15.70 | C |
| ATOM | 1959 | CG  | MET A 267  | 22.782 | 14.719 | 2.177  | 1.00 | 18.79 | C |
| ATOM | 1960 | SD  | MET A 267  | 21.357 | 15.807 | 2.441  | 1.00 | 23.88 | S |
| ATOM | 1961 | CE  | MET A 267  | 21.345 | 16.715 | 0.896  | 1.00 | 22.85 | C |
| ATOM | 1962 | C   | MET A 267  | 24.158 | 11.978 | 2.231  | 1.00 | 12.15 | C |
| ATOM | 1963 | O   | MET A 267  | 23.592 | 11.141 | 2.956  | 1.00 | 13.35 | O |
| ATOM | 1964 | N   | ASP A 268  | 25.393 | 12.441 | 2.478  | 1.00 | 14.67 | N |
| ATOM | 1965 | CA  | AASP A 268 | 26.115 | 12.081 | 3.696  | 0.50 | 14.53 | C |
| ATOM | 1966 | CA  | BASP A 268 | 26.106 | 12.059 | 3.712  | 0.50 | 15.35 | C |
| ATOM | 1967 | CB  | AASP A 268 | 27.632 | 11.893 | 3.442  | 0.50 | 16.92 | C |
| ATOM | 1968 | CB  | BASP A 268 | 27.626 | 11.912 | 3.496  | 0.50 | 19.43 | C |
| ATOM | 1969 | CG  | AASP A 268 | 28.414 | 13.203 | 3.364  | 0.50 | 18.96 | C |
| ATOM | 1970 | CG  | BASP A 268 | 28.255 | 10.810 | 4.377  | 0.50 | 24.70 | C |
| ATOM | 1971 | OD1 | AASP A 268 | 27.833 | 14.295 | 3.182  | 0.50 | 15.94 | O |
| ATOM | 1972 | OD1 | BASP A 268 | 27.765 | 10.529 | 5.502  | 0.50 | 21.79 | O |
| ATOM | 1973 | OD2 | AASP A 268 | 29.655 | 13.125 | 3.487  | 0.50 | 25.28 | O |
| ATOM | 1974 | OD2 | BASP A 268 | 29.253 | 10.208 | 3.932  | 0.50 | 30.56 | O |
| ATOM | 1975 | C   | ASP A 268  | 25.785 | 13.046 | 4.831  | 1.00 | 14.34 | C |
| ATOM | 1976 | O   | ASP A 268  | 25.079 | 14.062 | 4.610  | 1.00 | 12.72 | O |
| ATOM | 1977 | N   | PHE A 269  | 26.266 | 12.742 | 6.037  | 1.00 | 13.43 | N |
| ATOM | 1978 | CA  | PHE A 269  | 25.919 | 13.579 | 7.179  | 1.00 | 14.78 | C |
| ATOM | 1979 | CB  | PHE A 269  | 26.323 | 13.014 | 8.539  | 1.00 | 18.74 | C |
| ATOM | 1980 | CG  | PHE A 269  | 25.689 | 13.783 | 9.652  | 1.00 | 23.29 | C |
| ATOM | 1981 | CD1 | PHE A 269  | 24.345 | 13.566 | 9.975  | 1.00 | 26.92 | C |
| ATOM | 1982 | CE1 | PHE A 269  | 23.718 | 14.337 | 10.946 | 1.00 | 25.75 | C |
| ATOM | 1983 | CZ  | PHE A 269  | 24.428 | 15.350 | 11.583 | 1.00 | 20.83 | C |
| ATOM | 1984 | CE2 | PHE A 269  | 25.757 | 15.589 | 11.252 | 1.00 | 19.94 | C |
| ATOM | 1985 | CD2 | PHE A 269  | 26.377 | 14.822 | 10.285 | 1.00 | 22.32 | C |
| ATOM | 1986 | C   | PHE A 269  | 26.348 | 15.045 | 7.069  | 1.00 | 13.90 | C |
| ATOM | 1987 | O   | PHE A 269  | 25.568 | 15.931 | 7.417  | 1.00 | 13.82 | O |
| ATOM | 1988 | N   | ASP A 270  | 27.569 | 15.293 | 6.595  | 1.00 | 15.01 | N |
| ATOM | 1989 | CA  | ASP A 270  | 28.043 | 16.676 | 6.373  | 1.00 | 13.86 | C |
| ATOM | 1990 | CB  | ASP A 270  | 29.431 | 16.714 | 5.731  | 1.00 | 17.92 | C |
| ATOM | 1991 | CG  | ASP A 270  | 29.870 | 18.159 | 5.402  | 1.00 | 19.82 | C |
| ATOM | 1992 | OD1 | ASP A 270  | 30.069 | 18.934 | 6.341  | 1.00 | 21.28 | O |
| ATOM | 1993 | OD2 | ASP A 270  | 29.948 | 18.538 | 4.216  | 1.00 | 29.78 | O |
| ATOM | 1994 | C   | ASP A 270  | 27.086 | 17.509 | 5.513  | 1.00 | 11.98 | C |
| ATOM | 1995 | O   | ASP A 270  | 26.708 | 18.627 | 5.890  | 1.00 | 12.78 | O |
| ATOM | 1996 | N   | GLU A 271  | 26.701 | 16.953 | 4.363  | 1.00 | 11.63 | N |
| ATOM | 1997 | CA  | GLU A 271  | 25.814 | 17.629 | 3.429  | 1.00 | 12.31 | C |

|      |      |     |           |        |        |        |      |       |   |
|------|------|-----|-----------|--------|--------|--------|------|-------|---|
| ATOM | 1998 | CB  | GLU A 271 | 25.707 | 16.845 | 2.112  | 1.00 | 12.67 | C |
| ATOM | 1999 | CG  | GLU A 271 | 24.902 | 17.577 | 1.035  | 1.00 | 15.59 | C |
| ATOM | 2000 | CD  | GLU A 271 | 24.892 | 16.905 | -0.329 | 1.00 | 15.06 | C |
| ATOM | 2001 | OE1 | GLU A 271 | 25.349 | 15.767 | -0.461 | 1.00 | 17.69 | O |
| ATOM | 2002 | OE2 | GLU A 271 | 24.432 | 17.544 | -1.299 | 1.00 | 19.96 | O |
| ATOM | 2003 | C   | GLU A 271 | 24.431 | 17.856 | 4.055  | 1.00 | 13.08 | C |
| ATOM | 2004 | O   | GLU A 271 | 23.832 | 18.935 | 3.889  | 1.00 | 11.69 | O |
| ATOM | 2005 | N   | PHE A 272 | 23.945 | 16.851 | 4.789  | 1.00 | 11.94 | N |
| ATOM | 2006 | CA  | PHE A 272 | 22.664 | 16.967 | 5.508  | 1.00 | 11.81 | C |
| ATOM | 2007 | CB  | PHE A 272 | 22.293 | 15.619 | 6.167  | 1.00 | 10.64 | C |
| ATOM | 2008 | CG  | PHE A 272 | 21.151 | 15.708 | 7.162  | 1.00 | 12.10 | C |
| ATOM | 2009 | CD1 | PHE A 272 | 19.839 | 15.978 | 6.735  | 1.00 | 12.13 | C |
| ATOM | 2010 | CE1 | PHE A 272 | 18.788 | 16.071 | 7.648  | 1.00 | 12.36 | C |
| ATOM | 2011 | CZ  | PHE A 272 | 19.033 | 15.868 | 9.006  | 1.00 | 12.60 | C |
| ATOM | 2012 | CE2 | PHE A 272 | 20.336 | 15.604 | 9.447  | 1.00 | 13.80 | C |
| ATOM | 2013 | CD2 | PHE A 272 | 21.382 | 15.515 | 8.523  | 1.00 | 11.19 | C |
| ATOM | 2014 | C   | PHE A 272 | 22.678 | 18.109 | 6.538  | 1.00 | 12.40 | C |
| ATOM | 2015 | O   | PHE A 272 | 21.800 | 18.993 | 6.522  | 1.00 | 10.94 | O |
| ATOM | 2016 | N   | PHE A 273 | 23.686 | 18.091 | 7.409  | 1.00 | 12.54 | N |
| ATOM | 2017 | CA  | PHE A 273 | 23.814 | 19.068 | 8.493  | 1.00 | 14.10 | C |
| ATOM | 2018 | CB  | PHE A 273 | 25.013 | 18.758 | 9.398  | 1.00 | 16.43 | C |
| ATOM | 2019 | CG  | PHE A 273 | 25.053 | 19.601 | 10.647 | 1.00 | 20.80 | C |
| ATOM | 2020 | CD1 | PHE A 273 | 24.273 | 19.261 | 11.768 | 1.00 | 28.45 | C |
| ATOM | 2021 | CE1 | PHE A 273 | 24.302 | 20.044 | 12.923 | 1.00 | 24.88 | C |
| ATOM | 2022 | CZ  | PHE A 273 | 25.111 | 21.180 | 12.968 | 1.00 | 24.82 | C |
| ATOM | 2023 | CE2 | PHE A 273 | 25.889 | 21.534 | 11.863 | 1.00 | 29.96 | C |
| ATOM | 2024 | CD2 | PHE A 273 | 25.861 | 20.747 | 10.711 | 1.00 | 27.03 | C |
| ATOM | 2025 | C   | PHE A 273 | 23.889 | 20.505 | 7.974  | 1.00 | 13.05 | C |
| ATOM | 2026 | O   | PHE A 273 | 23.312 | 21.413 | 8.584  | 1.00 | 15.19 | O |
| ATOM | 2027 | N   | HIS A 274 | 24.561 | 20.690 | 6.833  | 1.00 | 12.46 | N |
| ATOM | 2028 | CA  | HIS A 274 | 24.749 | 22.012 | 6.240  | 1.00 | 11.66 | C |
| ATOM | 2029 | CB  | HIS A 274 | 26.192 | 22.170 | 5.720  | 1.00 | 11.45 | C |
| ATOM | 2030 | CG  | HIS A 274 | 27.206 | 22.087 | 6.798  | 1.00 | 12.78 | C |
| ATOM | 2031 | ND1 | HIS A 274 | 27.935 | 20.948 | 7.043  | 1.00 | 13.25 | N |
| ATOM | 2032 | CE1 | HIS A 274 | 28.736 | 21.158 | 8.074  | 1.00 | 16.94 | C |
| ATOM | 2033 | NE2 | HIS A 274 | 28.547 | 22.391 | 8.505  | 1.00 | 17.43 | N |
| ATOM | 2034 | CD2 | HIS A 274 | 27.598 | 22.996 | 7.720  | 1.00 | 14.90 | C |
| ATOM | 2035 | C   | HIS A 274 | 23.753 | 22.375 | 5.157  | 1.00 | 11.73 | C |
| ATOM | 2036 | O   | HIS A 274 | 23.929 | 23.389 | 4.461  | 1.00 | 13.06 | O |
| ATOM | 2037 | N   | HIS A 275 | 22.688 | 21.575 | 5.012  | 1.00 | 10.64 | N |
| ATOM | 2038 | CA  | HIS A 275 | 21.743 | 21.807 | 3.932  | 1.00 | 10.38 | C |
| ATOM | 2039 | CB  | HIS A 275 | 20.777 | 20.618 | 3.744  | 1.00 | 10.39 | C |



|      |      |     |           |        |        |       |      |       |   |
|------|------|-----|-----------|--------|--------|-------|------|-------|---|
| ATOM | 2040 | CG  | HIS A 275 | 20.023 | 20.677 | 2.449 | 1.00 | 10.78 | C |
| ATOM | 2041 | ND1 | HIS A 275 | 18.868 | 21.413 | 2.297 | 1.00 | 10.14 | N |
| ATOM | 2042 | CE1 | HIS A 275 | 18.441 | 21.313 | 1.052 | 1.00 | 11.73 | C |
| ATOM | 2043 | NE2 | HIS A 275 | 19.289 | 20.553 | 0.382 | 1.00 | 11.07 | N |
| ATOM | 2044 | CD2 | HIS A 275 | 20.297 | 20.159 | 1.228 | 1.00 | 11.30 | C |
| ATOM | 2045 | C   | HIS A 275 | 20.974 | 23.122 | 4.137 | 1.00 | 10.53 | C |
| ATOM | 2046 | O   | HIS A 275 | 20.564 | 23.424 | 5.260 | 1.00 | 13.02 | O |
| ATOM | 2047 | N   | PRO A 276 | 20.767 | 23.892 | 3.050 | 1.00 | 12.42 | N |
| ATOM | 2048 | CA  | PRO A 276 | 20.050 | 25.176 | 3.178 | 1.00 | 13.83 | C |
| ATOM | 2049 | CB  | PRO A 276 | 19.952 | 25.664 | 1.738 | 1.00 | 17.99 | C |
| ATOM | 2050 | CG  | PRO A 276 | 21.151 | 25.077 | 1.077 | 1.00 | 17.05 | C |
| ATOM | 2051 | CD  | PRO A 276 | 21.309 | 23.712 | 1.686 | 1.00 | 12.95 | C |
| ATOM | 2052 | C   | PRO A 276 | 18.654 | 25.056 | 3.781 | 1.00 | 14.25 | C |
| ATOM | 2053 | O   | PRO A 276 | 18.181 | 26.014 | 4.402 | 1.00 | 14.80 | O |
| ATOM | 2054 | N   | PHE A 277 | 17.995 | 23.904 | 3.626 | 1.00 | 12.17 | N |
| ATOM | 2055 | CA  | PHE A 277 | 16.661 | 23.762 | 4.219 | 1.00 | 13.48 | C |
| ATOM | 2056 | CB  | PHE A 277 | 15.940 | 22.473 | 3.799 | 1.00 | 14.51 | C |
| ATOM | 2057 | CG  | PHE A 277 | 14.556 | 22.341 | 4.405 | 1.00 | 11.87 | C |
| ATOM | 2058 | CD1 | PHE A 277 | 13.484 | 23.079 | 3.895 | 1.00 | 13.96 | C |
| ATOM | 2059 | CE1 | PHE A 277 | 12.206 | 22.978 | 4.466 | 1.00 | 14.05 | C |
| ATOM | 2060 | CZ  | PHE A 277 | 12.002 | 22.144 | 5.554 | 1.00 | 11.30 | C |
| ATOM | 2061 | CE2 | PHE A 277 | 13.067 | 21.398 | 6.074 | 1.00 | 11.64 | C |
| ATOM | 2062 | CD2 | PHE A 277 | 14.338 | 21.511 | 5.504 | 1.00 | 12.24 | C |
| ATOM | 2063 | C   | PHE A 277 | 16.680 | 23.893 | 5.736 | 1.00 | 16.96 | C |
| ATOM | 2064 | O   | PHE A 277 | 15.701 | 24.339 | 6.331 | 1.00 | 15.83 | O |
| ATOM | 2065 | N   | LEU A 278 | 17.780 | 23.483 | 6.355 | 1.00 | 13.10 | N |
| ATOM | 2066 | CA  | LEU A 278 | 17.929 | 23.577 | 7.800 | 1.00 | 18.07 | C |
| ATOM | 2067 | CB  | LEU A 278 | 18.943 | 22.540 | 8.312 | 1.00 | 20.67 | C |
| ATOM | 2068 | CG  | LEU A 278 | 18.465 | 21.085 | 8.302 | 1.00 | 23.11 | C |
| ATOM | 2069 | CD1 | LEU A 278 | 19.534 | 20.164 | 8.854 | 1.00 | 25.79 | C |
| ATOM | 2070 | CD2 | LEU A 278 | 17.201 | 20.960 | 9.121 | 1.00 | 31.92 | C |
| ATOM | 2071 | C   | LEU A 278 | 18.238 | 24.988 | 8.321 | 1.00 | 29.69 | C |
| ATOM | 2072 | O   | LEU A 278 | 18.469 | 25.164 | 9.518 | 1.00 | 33.88 | O |
| ATOM | 2073 | N   | ASP A 279 | 18.233 | 25.978 | 7.424 | 1.00 | 30.25 | N |
| ATOM | 2074 | CA  | ASP A 279 | 18.286 | 27.409 | 7.785 | 1.00 | 41.25 | C |
| ATOM | 2075 | CB  | ASP A 279 | 19.247 | 28.161 | 6.855 | 1.00 | 45.46 | C |
| ATOM | 2076 | CG  | ASP A 279 | 20.648 | 28.318 | 7.441 | 1.00 | 48.23 | C |
| ATOM | 2077 | OD1 | ASP A 279 | 20.978 | 27.666 | 8.456 | 1.00 | 59.85 | O |
| ATOM | 2078 | OD2 | ASP A 279 | 21.428 | 29.111 | 6.877 | 1.00 | 50.97 | O |
| ATOM | 2079 | C   | ASP A 279 | 16.898 | 28.056 | 7.735 | 1.00 | 44.26 | C |
| ATOM | 2080 | O   | ASP A 279 | 16.140 | 27.820 | 6.785 | 1.00 | 36.32 | O |
| ATOM | 2081 | N   | ALA A 280 | 16.592 | 28.876 | 8.748 | 1.00 | 40.74 | N |

|      |      |     |           |        |         |        |      |       |   |
|------|------|-----|-----------|--------|---------|--------|------|-------|---|
| ATOM | 2082 | CA  | ALA A 280 | 15.266 | 29.507  | 8.957  | 1.00 | 43.93 | C |
| ATOM | 2083 | CB  | ALA A 280 | 15.341 | 30.551  | 10.069 | 1.00 | 55.60 | C |
| ATOM | 2084 | C   | ALA A 280 | 14.598 | 30.098  | 7.708  | 1.00 | 36.41 | C |
| ATOM | 2085 | O   | ALA A 280 | 15.199 | 30.890  | 6.980  | 1.00 | 34.24 | O |
| ATOM | 2086 | N   | SER A 283 | 14.129 | -10.969 | 6.464  | 1.00 | 42.34 | N |
| ATOM | 2087 | CA  | SER A 283 | 15.205 | -10.786 | 7.439  | 1.00 | 34.55 | C |
| ATOM | 2088 | CB  | SER A 283 | 16.517 | -10.391 | 6.746  | 1.00 | 39.79 | C |
| ATOM | 2089 | C   | SER A 283 | 14.844 | -9.768  | 8.515  | 1.00 | 34.53 | C |
| ATOM | 2090 | O   | SER A 283 | 15.239 | -9.931  | 9.678  | 1.00 | 32.80 | O |
| ATOM | 2091 | N   | VAL A 284 | 14.121 | -8.713  | 8.119  | 1.00 | 30.22 | N |
| ATOM | 2092 | CA  | VAL A 284 | 13.613 | -7.702  | 9.059  | 1.00 | 33.82 | C |
| ATOM | 2093 | CB  | VAL A 284 | 14.249 | -6.294  | 8.871  | 1.00 | 33.18 | C |
| ATOM | 2094 | CG1 | VAL A 284 | 15.736 | -6.370  | 8.537  | 1.00 | 35.70 | C |
| ATOM | 2095 | CG2 | VAL A 284 | 14.058 | -5.467  | 10.129 | 1.00 | 38.38 | C |
| ATOM | 2096 | C   | VAL A 284 | 12.087 | -7.594  | 8.951  | 1.00 | 31.53 | C |
| ATOM | 2097 | O   | VAL A 284 | 11.543 | -7.439  | 7.858  | 1.00 | 34.02 | O |
| ATOM | 2098 | N   | ARG A 285 | 11.409 | -7.681  | 10.092 | 1.00 | 32.01 | N |
| ATOM | 2099 | CA  | ARG A 285 | 9.955  | -7.551  | 10.132 | 1.00 | 25.90 | C |
| ATOM | 2100 | CB  | ARG A 285 | 9.288  | -8.910  | 10.408 | 1.00 | 30.37 | C |
| ATOM | 2101 | CG  | ARG A 285 | 9.592  | -9.509  | 11.783 | 1.00 | 33.32 | C |
| ATOM | 2102 | CD  | ARG A 285 | 9.207  | -10.975 | 11.853 | 1.00 | 36.88 | C |
| ATOM | 2103 | NE  | ARG A 285 | 10.007 | -11.787 | 10.930 | 1.00 | 36.65 | N |
| ATOM | 2104 | CZ  | ARG A 285 | 9.760  | -13.059 | 10.620 | 1.00 | 39.71 | C |
| ATOM | 2105 | NH1 | ARG A 285 | 8.727  | -13.705 | 11.158 | 1.00 | 30.04 | N |
| ATOM | 2106 | NH2 | ARG A 285 | 10.553 | -13.691 | 9.765  | 1.00 | 33.30 | N |
| ATOM | 2107 | C   | ARG A 285 | 9.524  | -6.499  | 11.150 | 1.00 | 24.70 | C |
| ATOM | 2108 | O   | ARG A 285 | 10.368 | -5.788  | 11.722 | 1.00 | 23.69 | O |
| ATOM | 2109 | N   | LYS A 286 | 8.205  | -6.384  | 11.335 | 1.00 | 23.34 | N |
| ATOM | 2110 | CA  | LYS A 286 | 7.649  | -5.558  | 12.383 | 1.00 | 27.43 | C |
| ATOM | 2111 | CB  | LYS A 286 | 6.127  | -5.451  | 12.264 | 1.00 | 32.65 | C |
| ATOM | 2112 | CG  | LYS A 286 | 5.632  | -4.340  | 11.361 | 1.00 | 37.36 | C |
| ATOM | 2113 | CD  | LYS A 286 | 4.818  | -4.868  | 10.197 | 1.00 | 47.12 | C |
| ATOM | 2114 | CE  | LYS A 286 | 4.044  | -3.740  | 9.532  | 1.00 | 48.67 | C |
| ATOM | 2115 | NZ  | LYS A 286 | 3.155  | -4.229  | 8.444  | 1.00 | 53.38 | N |
| ATOM | 2116 | C   | LYS A 286 | 8.008  | -6.123  | 13.754 | 1.00 | 25.61 | C |
| ATOM | 2117 | O   | LYS A 286 | 8.023  | -7.347  | 13.963 | 1.00 | 20.61 | O |
| ATOM | 2118 | N   | SER A 287 | 8.295  | -5.217  | 14.684 | 1.00 | 21.01 | N |
| ATOM | 2119 | CA  | SER A 287 | 8.244  | -5.537  | 16.110 | 1.00 | 20.28 | C |
| ATOM | 2120 | CB  | SER A 287 | 8.511  | -4.273  | 16.934 | 1.00 | 18.27 | C |
| ATOM | 2121 | OG  | SER A 287 | 7.647  | -3.217  | 16.538 | 1.00 | 24.95 | O |
| ATOM | 2122 | C   | SER A 287 | 6.842  | -6.112  | 16.380 | 1.00 | 20.11 | C |
| ATOM | 2123 | O   | SER A 287 | 5.909  | -5.774  | 15.640 | 1.00 | 18.72 | O |

|        |      |     |           |        |        |        |      |       |   |
|--------|------|-----|-----------|--------|--------|--------|------|-------|---|
| ATOM   | 2124 | N   | PRO A 288 | 6.685  | -6.991 | 17.413 | 1.00 | 22.70 | N |
| ATOM   | 2125 | CA  | PRO A 288 | 5.384  | -7.636 | 17.687 | 1.00 | 24.42 | C |
| ATOM   | 2126 | CB  | PRO A 288 | 5.684  | -8.590 | 18.853 | 1.00 | 23.73 | C |
| ATOM   | 2127 | CG  | PRO A 288 | 7.165  | -8.697 | 18.930 | 1.00 | 24.04 | C |
| ATOM   | 2128 | CD  | PRO A 288 | 7.714  | -7.415 | 18.384 | 1.00 | 21.78 | C |
| ATOM   | 2129 | C   | PRO A 288 | 4.287  | -6.633 | 18.102 | 1.00 | 24.54 | C |
| ATOM   | 2130 | O   | PRO A 288 | 4.615  | -5.569 | 18.639 | 1.00 | 19.94 | O |
| ATOM   | 2131 | N   | PRO A 289 | 2.999  | -6.966 | 17.852 | 1.00 | 22.81 | N |
| ATOM   | 2132 | CA  | PRO A 289 | 1.901  | -6.053 | 18.198 | 1.00 | 25.11 | C |
| ATOM   | 2133 | CB  | PRO A 289 | 0.643  | -6.857 | 17.847 | 1.00 | 24.27 | C |
| ATOM   | 2134 | CG  | PRO A 289 | 1.094  | -7.850 | 16.837 | 1.00 | 27.72 | C |
| ATOM   | 2135 | CD  | PRO A 289 | 2.488  | -8.214 | 17.246 | 1.00 | 20.74 | C |
| ATOM   | 2136 | C   | PRO A 289 | 1.902  | -5.708 | 19.685 | 1.00 | 27.96 | C |
| ATOM   | 2137 | O   | PRO A 289 | 2.130  | -6.582 | 20.532 | 1.00 | 29.40 | O |
| ATOM   | 2138 | N   | VAL A 290 | 1.664  | -4.433 | 19.976 | 1.00 | 30.95 | N |
| ATOM   | 2139 | CA  | VAL A 290 | 1.723  | -3.899 | 21.334 | 1.00 | 31.46 | C |
| ATOM   | 2140 | CB  | VAL A 290 | 1.964  | -2.370 | 21.306 | 1.00 | 34.23 | C |
| ATOM   | 2141 | CG1 | VAL A 290 | 1.826  | -1.762 | 22.689 | 1.00 | 35.29 | C |
| ATOM   | 2142 | CG2 | VAL A 290 | 3.340  | -2.050 | 20.723 | 1.00 | 31.37 | C |
| ATOM   | 2143 | C   | VAL A 290 | 0.445  | -4.254 | 22.100 | 1.00 | 38.64 | C |
| ATOM   | 2144 | O   | VAL A 290 | 0.502  | -4.936 | 23.126 | 1.00 | 36.27 | O |
| TER    |      |     |           |        |        |        |      |       |   |
| HETATM | 2145 | C1  | SX1   1   | 11.551 | 7.660  | 26.812 | 1.00 | 26.99 | C |
| HETATM | 2146 | C2  | SX1   1   | 11.622 | 8.787  | 27.643 | 1.00 | 24.10 | C |
| HETATM | 2147 | C3  | SX1   1   | 9.190  | 8.079  | 26.313 | 1.00 | 17.79 | C |
| HETATM | 2148 | C4  | SX1   1   | 10.358 | 7.308  | 26.160 | 1.00 | 22.88 | C |
| HETATM | 2149 | C5  | SX1   1   | 9.300  | 9.201  | 27.153 | 1.00 | 19.41 | C |
| HETATM | 2150 | C6  | SX1   1   | 10.471 | 9.573  | 27.808 | 1.00 | 17.63 | C |
| HETATM | 2151 | C7  | SX1   1   | 10.411 | 6.104  | 25.292 | 1.00 | 26.59 | C |
| HETATM | 2152 | C8  | SX1   1   | 7.100  | 3.683  | 24.444 | 1.00 | 34.20 | C |
| HETATM | 2153 | C9  | SX1   1   | 8.769  | 2.147  | 23.375 | 1.00 | 39.25 | C |
| HETATM | 2154 | C10 | SX1   1   | 9.079  | 4.977  | 22.267 | 1.00 | 26.73 | C |
| HETATM | 2155 | C11 | SX1   1   | 8.586  | 3.391  | 24.252 | 1.00 | 29.56 | C |
| HETATM | 2156 | C12 | SX1   1   | 9.403  | 4.593  | 23.708 | 1.00 | 29.18 | C |
| HETATM | 2157 | N13 | SX1   1   | 8.419  | 10.170 | 27.541 | 1.00 | 18.83 | N |
| HETATM | 2158 | N14 | SX1   1   | 8.987  | 11.068 | 28.378 | 1.00 | 18.72 | N |
| HETATM | 2159 | N15 | SX1   1   | 10.264 | 10.718 | 28.538 | 1.00 | 16.44 | N |
| HETATM | 2160 | N16 | SX1   1   | 9.293  | 5.769  | 24.564 | 1.00 | 27.16 | N |
| HETATM | 2161 | O17 | SX1   1   | 11.469 | 5.469  | 25.222 | 1.00 | 23.51 | O |
| TER    |      |     |           |        |        |        |      |       |   |
| HETATM | 2162 | O   | DMS K 1   | 6.235  | 24.665 | 15.699 | 1.00 | 45.19 | O |
| HETATM | 2163 | S   | DMS K 1   | 6.577  | 24.556 | 17.138 | 1.00 | 60.63 | S |

|             |    |      |   |    |        |        |        |      |       |    |
|-------------|----|------|---|----|--------|--------|--------|------|-------|----|
| HETATM 2164 | C2 | DMS  | K | 1  | 5.550  | 25.550 | 18.080 | 1.00 | 51.19 | C  |
| HETATM 2165 | C1 | DMS  | K | 1  | 8.075  | 25.318 | 17.443 | 1.00 | 48.87 | C  |
| HETATM 2166 | CL | CL   | K | 2  | 5.607  | -8.439 | 10.525 | 1.00 | 33.00 | CL |
| TER         |    |      |   |    |        |        |        |      |       |    |
| HETATM 2167 | O  | HOH  | W | 1  | 15.153 | 10.082 | -4.590 | 1.00 | 12.77 | O  |
| HETATM 2168 | O  | HOH  | W | 2  | 6.167  | -0.867 | 8.768  | 1.00 | 14.01 | O  |
| HETATM 2169 | O  | HOH  | W | 3  | 2.706  | 19.952 | 4.647  | 1.00 | 10.44 | O  |
| HETATM 2170 | O  | HOH  | W | 4  | 27.385 | 8.507  | -6.573 | 1.00 | 37.26 | O  |
| HETATM 2171 | O  | HOH  | W | 5  | 3.193  | 8.067  | 12.539 | 1.00 | 21.40 | O  |
| HETATM 2172 | O  | HOH  | W | 6  | 11.710 | 2.252  | 4.022  | 1.00 | 13.22 | O  |
| HETATM 2173 | O  | HOH  | W | 7  | 16.803 | 4.628  | 11.780 | 1.00 | 10.47 | O  |
| HETATM 2174 | O  | HOH  | W | 8  | 17.649 | 7.761  | 42.817 | 1.00 | 27.17 | O  |
| HETATM 2175 | O  | HOH  | W | 9  | 20.125 | 5.748  | -5.355 | 1.00 | 12.98 | O  |
| HETATM 2176 | O  | HOH  | W | 10 | 20.205 | -5.540 | 41.310 | 1.00 | 29.81 | O  |
| HETATM 2177 | O  | HOH  | W | 11 | 8.395  | 4.475  | 3.258  | 1.00 | 16.93 | O  |
| HETATM 2178 | O  | HOH  | W | 12 | 4.269  | 24.571 | 4.269  | 1.00 | 12.22 | O  |
| HETATM 2179 | O  | HOH  | W | 13 | 20.883 | 13.834 | 26.629 | 1.00 | 23.62 | O  |
| HETATM 2180 | O  | AHOH | W | 14 | 13.044 | -0.924 | 25.037 | 0.50 | 12.49 | O  |
| HETATM 2181 | O  | BHOH | W | 14 | 15.337 | -0.166 | 25.141 | 0.50 | 16.48 | O  |
| HETATM 2182 | O  | HOH  | W | 15 | 0.034  | 21.228 | 4.543  | 1.00 | 47.54 | O  |
| HETATM 2183 | O  | HOH  | W | 16 | 6.102  | 8.534  | -2.848 | 1.00 | 29.21 | O  |
| HETATM 2184 | O  | HOH  | W | 17 | 25.789 | 24.405 | 2.581  | 1.00 | 11.22 | O  |
| HETATM 2185 | O  | HOH  | W | 18 | 16.775 | 6.064  | -5.438 | 1.00 | 14.29 | O  |
| HETATM 2186 | O  | HOH  | W | 19 | 15.990 | 10.063 | 50.842 | 1.00 | 16.81 | O  |
| HETATM 2187 | O  | HOH  | W | 20 | 2.596  | -4.688 | -1.766 | 1.00 | 21.30 | O  |
| HETATM 2188 | O  | HOH  | W | 21 | 14.669 | 21.462 | -5.903 | 1.00 | 15.77 | O  |
| HETATM 2189 | O  | HOH  | W | 22 | 17.293 | 2.533  | 8.428  | 1.00 | 9.08  | O  |
| HETATM 2190 | O  | HOH  | W | 23 | 23.911 | 2.868  | 5.026  | 1.00 | 12.23 | O  |
| HETATM 2191 | O  | HOH  | W | 24 | 24.706 | -1.923 | 1.139  | 1.00 | 19.69 | O  |
| HETATM 2192 | O  | HOH  | W | 25 | 22.075 | 23.793 | 7.483  | 1.00 | 18.86 | O  |
| HETATM 2193 | O  | HOH  | W | 26 | 8.869  | 13.511 | -7.088 | 1.00 | 15.25 | O  |
| HETATM 2194 | O  | HOH  | W | 27 | 4.899  | 22.411 | 0.982  | 1.00 | 14.58 | O  |
| HETATM 2195 | O  | HOH  | W | 28 | 29.610 | 0.541  | 5.800  | 1.00 | 38.28 | O  |
| HETATM 2196 | O  | HOH  | W | 29 | 14.985 | 18.806 | -6.669 | 1.00 | 19.09 | O  |
| HETATM 2197 | O  | HOH  | W | 30 | 22.502 | -6.089 | 7.296  | 1.00 | 21.81 | O  |
| HETATM 2198 | O  | HOH  | W | 31 | 21.767 | 0.934  | -0.371 | 1.00 | 17.21 | O  |
| HETATM 2199 | O  | HOH  | W | 32 | 10.228 | 16.039 | -7.366 | 1.00 | 17.39 | O  |
| HETATM 2200 | O  | HOH  | W | 33 | 17.904 | 2.387  | 18.905 | 1.00 | 17.07 | O  |
| HETATM 2201 | O  | HOH  | W | 34 | 15.082 | 0.827  | 22.344 | 1.00 | 24.72 | O  |
| HETATM 2202 | O  | HOH  | W | 35 | 17.717 | 7.842  | -7.456 | 1.00 | 24.56 | O  |
| HETATM 2203 | O  | HOH  | W | 36 | 24.939 | 14.166 | -2.693 | 1.00 | 28.99 | O  |
| HETATM 2204 | O  | HOH  | W | 37 | 11.943 | 0.954  | 12.870 | 1.00 | 18.49 | O  |

|             |   |           |        |         |         |      |       |   |
|-------------|---|-----------|--------|---------|---------|------|-------|---|
| HETATM 2205 | O | HOH W 38  | 9.406  | -1.073  | 22.295  | 1.00 | 18.53 | O |
| HETATM 2206 | O | HOH W 39  | 2.683  | -2.314  | 33.282  | 1.00 | 20.01 | O |
| HETATM 2207 | O | HOH W 40  | 3.282  | 8.296   | -3.327  | 1.00 | 35.74 | O |
| HETATM 2208 | O | AHOH W 41 | 12.679 | 26.127  | 1.848   | 0.50 | 14.50 | O |
| HETATM 2209 | O | BHOH W 41 | 14.529 | 26.393  | 2.850   | 0.50 | 9.32  | O |
| HETATM 2210 | O | HOH W 42  | 15.093 | -0.996  | -11.434 | 1.00 | 28.47 | O |
| HETATM 2211 | O | HOH W 43  | 18.708 | 19.885  | -7.283  | 1.00 | 34.79 | O |
| HETATM 2212 | O | HOH W 44  | 24.357 | 20.938  | 2.113   | 1.00 | 14.61 | O |
| HETATM 2213 | O | HOH W 45  | -3.263 | 17.844  | 5.285   | 1.00 | 19.13 | O |
| HETATM 2214 | O | HOH W 46  | 10.991 | 27.127  | -3.707  | 1.00 | 17.80 | O |
| HETATM 2215 | O | HOH W 47  | 4.271  | 20.098  | -0.358  | 1.00 | 13.58 | O |
| HETATM 2216 | O | HOH W 48  | 27.776 | 5.396   | 1.257   | 1.00 | 18.37 | O |
| HETATM 2217 | O | HOH W 49  | 29.698 | 13.255  | 6.480   | 1.00 | 18.04 | O |
| HETATM 2218 | O | HOH W 50  | 2.443  | 14.874  | 20.246  | 1.00 | 15.87 | O |
| HETATM 2219 | O | HOH W 51  | 6.677  | 7.141   | 24.591  | 1.00 | 23.57 | O |
| HETATM 2220 | O | HOH W 52  | 6.723  | -1.521  | 19.509  | 1.00 | 23.60 | O |
| HETATM 2221 | O | HOH W 53  | 3.196  | 22.129  | 2.961   | 1.00 | 15.90 | O |
| HETATM 2222 | O | HOH W 54  | 0.661  | 9.115   | 13.290  | 1.00 | 19.03 | O |
| HETATM 2223 | O | HOH W 55  | 12.210 | 15.397  | 33.435  | 1.00 | 26.17 | O |
| HETATM 2224 | O | HOH W 56  | 11.699 | -11.817 | 24.534  | 1.00 | 27.91 | O |
| HETATM 2225 | O | HOH W 57  | 5.801  | 26.320  | 2.335   | 1.00 | 33.75 | O |
| HETATM 2226 | O | HOH W 58  | -3.140 | 12.274  | 18.354  | 1.00 | 26.58 | O |
| HETATM 2227 | O | HOH W 59  | 5.991  | 26.983  | 6.253   | 1.00 | 14.35 | O |
| HETATM 2228 | O | HOH W 60  | 27.500 | -1.802  | 19.637  | 1.00 | 30.29 | O |
| HETATM 2229 | O | HOH W 61  | 13.465 | 2.926   | 11.446  | 1.00 | 14.65 | O |
| HETATM 2230 | O | HOH W 62  | 3.854  | 13.179  | 27.059  | 1.00 | 32.23 | O |
| HETATM 2231 | O | HOH W 63  | 7.091  | 1.387   | 19.136  | 1.00 | 30.71 | O |
| HETATM 2232 | O | HOH W 64  | 16.836 | 1.796   | -12.060 | 1.00 | 26.62 | O |
| HETATM 2233 | O | HOH W 65  | 5.903  | 26.537  | 11.940  | 1.00 | 17.53 | O |
| HETATM 2234 | O | HOH W 66  | 9.426  | -1.524  | 19.303  | 1.00 | 34.60 | O |
| HETATM 2235 | O | HOH W 67  | 11.067 | -3.379  | 34.634  | 1.00 | 26.92 | O |
| HETATM 2236 | O | HOH W 68  | 32.611 | -6.351  | 4.606   | 1.00 | 15.04 | O |
| HETATM 2237 | O | HOH W 69  | 21.813 | -2.814  | 20.093  | 1.00 | 36.44 | O |
| HETATM 2238 | O | HOH W 70  | 11.607 | -1.469  | 17.550  | 1.00 | 23.58 | O |
| HETATM 2239 | O | HOH W 71  | 18.776 | 13.431  | -5.340  | 1.00 | 19.25 | O |
| HETATM 2240 | O | HOH W 72  | 3.029  | 27.306  | 23.902  | 1.00 | 48.91 | O |
| HETATM 2241 | O | HOH W 73  | 5.372  | -3.108  | 17.795  | 1.00 | 20.68 | O |
| HETATM 2242 | O | HOH W 74  | 17.827 | 16.506  | 26.832  | 1.00 | 26.60 | O |
| HETATM 2243 | O | HOH W 75  | -0.698 | 6.441   | 27.000  | 1.00 | 34.98 | O |
| HETATM 2244 | O | HOH W 76  | 19.695 | -5.877  | 8.007   | 1.00 | 22.15 | O |
| HETATM 2245 | O | HOH W 77  | 8.485  | 18.069  | 29.143  | 1.00 | 29.26 | O |
| HETATM 2246 | O | HOH W 78  | 2.957  | 5.990   | -0.261  | 1.00 | 44.62 | O |

|             |   |           |        |         |         |      |       |   |
|-------------|---|-----------|--------|---------|---------|------|-------|---|
| HETATM 2247 | O | HOH W 79  | 5.977  | 6.852   | 21.748  | 1.00 | 20.76 | O |
| HETATM 2248 | O | HOH W 80  | 8.037  | -0.443  | 15.710  | 1.00 | 23.38 | O |
| HETATM 2249 | O | HOH W 81  | 6.090  | -3.038  | 6.333   | 1.00 | 30.84 | O |
| HETATM 2250 | O | HOH W 82  | 3.997  | 5.161   | 12.273  | 1.00 | 35.39 | O |
| HETATM 2251 | O | HOH W 83  | 14.648 | 6.605   | 25.508  | 1.00 | 28.76 | O |
| HETATM 2252 | O | HOH W 84  | 18.171 | 12.470  | 43.529  | 1.00 | 36.26 | O |
| HETATM 2253 | O | HOH W 85  | 26.683 | -3.381  | 8.141   | 1.00 | 31.93 | O |
| HETATM 2254 | O | HOH W 86  | 2.319  | 18.549  | 1.076   | 1.00 | 20.76 | O |
| HETATM 2255 | O | HOH W 87  | 1.761  | 13.549  | 8.777   | 1.00 | 26.50 | O |
| HETATM 2256 | O | HOH W 88  | 22.327 | 12.872  | -2.693  | 1.00 | 26.15 | O |
| HETATM 2257 | O | HOH W 89  | 28.226 | 6.420   | 9.066   | 1.00 | 26.09 | O |
| HETATM 2258 | O | HOH W 90  | 15.922 | 2.074   | 10.630  | 1.00 | 20.25 | O |
| HETATM 2259 | O | HOH W 91  | 23.797 | -1.795  | 30.944  | 1.00 | 34.55 | O |
| HETATM 2260 | O | HOH W 92  | 23.390 | 7.884   | 12.353  | 1.00 | 34.21 | O |
| HETATM 2261 | O | HOH W 93  | 23.264 | 19.784  | 23.844  | 1.00 | 38.02 | O |
| HETATM 2262 | O | HOH W 94  | 6.329  | -5.773  | -3.812  | 1.00 | 20.66 | O |
| HETATM 2263 | O | HOH W 95  | 25.969 | 18.485  | 23.831  | 1.00 | 47.48 | O |
| HETATM 2264 | O | HOH W 96  | 9.801  | 1.333   | 19.676  | 1.00 | 29.25 | O |
| HETATM 2265 | O | HOH W 97  | 15.042 | 24.435  | 15.762  | 1.00 | 31.62 | O |
| HETATM 2266 | O | HOH W 98  | 13.658 | -7.987  | 5.219   | 1.00 | 24.80 | O |
| HETATM 2267 | O | HOH W 99  | 5.225  | -8.302  | -4.051  | 1.00 | 35.25 | O |
| HETATM 2268 | O | HOH W 100 | 6.944  | 22.302  | -8.872  | 1.00 | 37.57 | O |
| HETATM 2269 | O | HOH W 101 | 2.940  | 8.551   | 38.527  | 1.00 | 24.41 | O |
| HETATM 2270 | O | HOH W 102 | 10.056 | 26.280  | 3.320   | 1.00 | 22.10 | O |
| HETATM 2271 | O | HOH W 103 | 27.814 | 13.128  | 25.166  | 1.00 | 42.11 | O |
| HETATM 2272 | O | HOH W 104 | 17.049 | 22.920  | -6.505  | 1.00 | 39.62 | O |
| HETATM 2273 | O | HOH W 105 | 8.842  | 27.992  | -1.810  | 1.00 | 36.90 | O |
| HETATM 2274 | O | HOH W 106 | 21.234 | -1.556  | 39.092  | 1.00 | 33.43 | O |
| HETATM 2275 | O | HOH W 107 | 23.268 | 20.816  | 18.698  | 1.00 | 36.70 | O |
| HETATM 2276 | O | HOH W 108 | 12.249 | 28.415  | -0.745  | 1.00 | 35.39 | O |
| HETATM 2277 | O | HOH W 109 | 7.207  | 31.871  | 13.655  | 1.00 | 29.74 | O |
| HETATM 2278 | O | HOH W 110 | 13.565 | 1.538   | -10.390 | 1.00 | 27.23 | O |
| HETATM 2279 | O | HOH W 111 | 4.893  | 13.618  | 38.098  | 1.00 | 29.27 | O |
| HETATM 2280 | O | HOH W 112 | 26.752 | 13.844  | 0.594   | 1.00 | 26.15 | O |
| HETATM 2281 | O | HOH W 113 | 10.924 | -13.678 | 26.657  | 1.00 | 41.50 | O |
| HETATM 2282 | O | HOH W 114 | 3.914  | -6.064  | 30.248  | 1.00 | 37.66 | O |
| HETATM 2283 | O | HOH W 115 | 6.662  | 12.007  | 25.202  | 1.00 | 31.17 | O |
| HETATM 2284 | O | HOH W 116 | 3.313  | 4.692   | 23.267  | 1.00 | 27.08 | O |
| HETATM 2285 | O | HOH W 117 | 16.040 | 21.005  | 23.638  | 1.00 | 40.05 | O |
| HETATM 2286 | O | HOH W 118 | 25.592 | 18.522  | 17.804  | 1.00 | 29.94 | O |
| HETATM 2287 | O | HOH W 119 | 30.665 | 2.000   | 9.228   | 1.00 | 41.96 | O |
| HETATM 2288 | O | HOH W 120 | 20.827 | 11.032  | 27.443  | 1.00 | 37.30 | O |

|             |   |            |        |         |        |      |       |   |
|-------------|---|------------|--------|---------|--------|------|-------|---|
| HETATM 2289 | O | HOH W 121  | 29.665 | 23.322  | 10.800 | 1.00 | 43.72 | O |
| HETATM 2290 | O | HOH W 122  | 2.097  | 7.379   | 19.769 | 1.00 | 33.25 | O |
| HETATM 2291 | O | AHOH W 123 | 6.470  | 25.574  | -0.312 | 0.50 | 16.29 | O |
| HETATM 2292 | O | BHOH W 123 | 4.859  | 26.258  | -1.502 | 0.50 | 8.70  | O |
| HETATM 2293 | O | HOH W 124  | 12.721 | 22.271  | -7.705 | 1.00 | 24.95 | O |
| HETATM 2294 | O | HOH W 125  | 12.066 | -0.503  | 46.259 | 1.00 | 45.91 | O |
| HETATM 2295 | O | HOH W 126  | 4.551  | -13.677 | 24.999 | 1.00 | 42.75 | O |
| HETATM 2296 | O | HOH W 127  | 14.743 | 1.304   | 19.603 | 1.00 | 26.38 | O |
| HETATM 2297 | O | HOH W 128  | 1.523  | 17.585  | -7.070 | 1.00 | 23.16 | O |
| HETATM 2298 | O | AHOH W 129 | 27.460 | 7.589   | 11.950 | 0.50 | 18.90 | O |
| HETATM 2299 | O | BHOH W 129 | 26.062 | 8.050   | 12.790 | 0.50 | 15.51 | O |
| HETATM 2300 | O | HOH W 130  | 7.096  | -3.612  | 33.978 | 1.00 | 37.15 | O |
| HETATM 2301 | O | HOH W 131  | 30.463 | 10.443  | 7.065  | 1.00 | 40.07 | O |
| HETATM 2302 | O | HOH W 132  | 9.568  | -9.560  | 15.323 | 1.00 | 37.50 | O |
| HETATM 2303 | O | HOH W 133  | 21.752 | -6.429  | 27.178 | 1.00 | 35.06 | O |
| HETATM 2304 | O | HOH W 134  | -0.486 | 18.691  | -5.156 | 1.00 | 31.52 | O |
| HETATM 2305 | O | HOH W 135  | 11.186 | 0.583   | 23.708 | 1.00 | 28.35 | O |
| HETATM 2306 | O | HOH W 136  | 6.818  | 7.081   | -5.457 | 1.00 | 38.28 | O |
| HETATM 2307 | O | HOH W 137  | 5.406  | -1.269  | 3.964  | 1.00 | 43.93 | O |
| HETATM 2308 | O | HOH W 138  | -2.651 | 10.849  | 6.429  | 1.00 | 38.74 | O |
| HETATM 2309 | O | HOH W 139  | 31.537 | -4.913  | 29.184 | 1.00 | 40.68 | O |
| HETATM 2310 | O | HOH W 140  | 19.459 | -7.355  | 12.580 | 1.00 | 43.94 | O |
| HETATM 2311 | O | HOH W 141  | 8.726  | -3.870  | 36.345 | 1.00 | 40.18 | O |
| HETATM 2312 | O | HOH W 142  | 28.840 | 9.685   | 0.528  | 1.00 | 42.21 | O |
| HETATM 2313 | O | HOH W 143  | 11.255 | -6.206  | 5.434  | 1.00 | 29.16 | O |
| HETATM 2314 | O | HOH W 144  | 23.506 | 21.653  | 15.925 | 1.00 | 30.83 | O |
| HETATM 2315 | O | HOH W 145  | 21.951 | 11.298  | 30.145 | 1.00 | 50.05 | O |
| HETATM 2316 | O | HOH W 146  | 30.192 | 8.037   | 12.354 | 1.00 | 26.85 | O |
| HETATM 2317 | O | HOH W 147  | 5.914  | 4.863   | -3.596 | 1.00 | 42.93 | O |
| HETATM 2318 | O | HOH W 148  | 5.452  | 32.142  | 17.291 | 1.00 | 33.05 | O |
| HETATM 2319 | O | HOH W 149  | 1.093  | 23.054  | 17.657 | 1.00 | 44.28 | O |
| HETATM 2320 | O | HOH W 150  | 10.277 | -10.994 | 22.152 | 1.00 | 45.22 | O |
| HETATM 2321 | O | HOH W 151  | 24.109 | 10.625  | 12.449 | 1.00 | 32.32 | O |
| HETATM 2322 | O | HOH W 152  | 1.557  | 1.595   | 40.260 | 1.00 | 37.06 | O |
| HETATM 2323 | O | HOH W 153  | 26.299 | 3.749   | 3.588  | 1.00 | 27.21 | O |
| HETATM 2324 | O | AHOH W 154 | 5.065  | 2.657   | 20.583 | 0.50 | 13.96 | O |
| HETATM 2325 | O | BHOH W 154 | 4.651  | 4.442   | 20.834 | 0.50 | 15.74 | O |
| HETATM 2326 | O | HOH W 155  | -1.585 | 12.146  | 8.924  | 1.00 | 32.66 | O |
| HETATM 2327 | O | HOH W 156  | 16.933 | -8.414  | 11.610 | 1.00 | 37.36 | O |
| HETATM 2328 | O | HOH W 157  | 30.026 | 6.247   | -0.455 | 1.00 | 37.86 | O |
| HETATM 2329 | O | HOH W 158  | 3.147  | -5.742  | 14.752 | 1.00 | 36.65 | O |
| HETATM 2330 | O | HOH W 159  | 6.153  | 2.821   | 13.555 | 1.00 | 23.38 | O |

|             |   |            |        |         |        |      |       |   |
|-------------|---|------------|--------|---------|--------|------|-------|---|
| HETATM 2331 | O | HOH W 160  | 1.421  | 10.545  | -3.728 | 1.00 | 39.34 | O |
| HETATM 2332 | O | HOH W 161  | 11.335 | 17.700  | 31.847 | 1.00 | 39.70 | O |
| HETATM 2333 | O | HOH W 162  | 13.782 | -10.110 | -5.671 | 1.00 | 33.40 | O |
| HETATM 2334 | O | HOH W 163  | 2.160  | 8.489   | 22.575 | 1.00 | 42.32 | O |
| HETATM 2335 | O | HOH W 164  | 19.092 | 4.839   | -7.937 | 1.00 | 32.82 | O |
| HETATM 2336 | O | HOH W 165  | -1.312 | 11.780  | -3.293 | 1.00 | 52.46 | O |
| HETATM 2337 | O | HOH W 166  | 11.625 | -8.384  | -6.218 | 1.00 | 29.05 | O |
| HETATM 2338 | O | HOH W 167  | -2.404 | 12.883  | 4.335  | 1.00 | 41.35 | O |
| HETATM 2339 | O | HOH W 168  | 24.836 | 11.945  | -4.917 | 1.00 | 42.53 | O |
| HETATM 2340 | O | HOH W 169  | 19.818 | 6.841   | 44.621 | 1.00 | 42.47 | O |
| HETATM 2341 | O | HOH W 170  | 21.444 | 21.631  | 13.536 | 1.00 | 37.60 | O |
| HETATM 2342 | O | HOH W 171  | -1.889 | -4.091  | 17.369 | 1.00 | 33.89 | O |
| HETATM 2343 | O | HOH W 172  | 26.552 | 10.580  | -1.803 | 1.00 | 28.47 | O |
| HETATM 2344 | O | HOH W 173  | 7.724  | 27.929  | 3.918  | 1.00 | 36.10 | O |
| HETATM 2345 | O | HOH W 174  | 5.596  | 19.360  | 32.143 | 1.00 | 40.79 | O |
| HETATM 2346 | O | HOH W 175  | 22.861 | 21.649  | 21.527 | 1.00 | 45.92 | O |
| HETATM 2347 | O | HOH W 176  | 10.816 | -10.941 | 0.530  | 1.00 | 46.46 | O |
| HETATM 2348 | O | HOH W 177  | 8.930  | -13.105 | -0.432 | 1.00 | 53.30 | O |
| HETATM 2349 | O | HOH W 178  | 8.901  | -2.485  | 40.889 | 1.00 | 46.06 | O |
| HETATM 2350 | O | HOH W 179  | 2.816  | 24.781  | 0.121  | 1.00 | 47.10 | O |
| HETATM 2351 | O | HOH W 180  | 15.697 | 20.933  | 26.501 | 1.00 | 40.74 | O |
| HETATM 2352 | O | HOH W 181  | 10.702 | 2.804   | -8.551 | 1.00 | 34.18 | O |
| HETATM 2353 | O | HOH W 182  | 2.587  | 13.221  | -3.133 | 1.00 | 33.29 | O |
| HETATM 2354 | O | HOH W 183  | 20.436 | -5.132  | 10.648 | 1.00 | 32.67 | O |
| HETATM 2355 | O | HOH W 184  | 6.827  | 26.597  | -3.596 | 1.00 | 46.37 | O |
| HETATM 2356 | O | HOH W 185  | 29.575 | 14.545  | 13.344 | 1.00 | 40.39 | O |
| HETATM 2357 | O | HOH W 186  | 1.332  | -7.743  | 6.313  | 1.00 | 38.91 | O |
| HETATM 2358 | O | HOH W 187  | 3.865  | -11.222 | 2.514  | 1.00 | 34.07 | O |
| HETATM 2359 | O | HOH W 188  | 2.967  | -2.487  | 16.260 | 1.00 | 47.86 | O |
| HETATM 2360 | O | HOH W 189  | 18.013 | 28.831  | 3.792  | 1.00 | 39.33 | O |
| HETATM 2361 | O | HOH W 190  | -1.400 | -5.470  | 14.804 | 1.00 | 38.65 | O |
| HETATM 2362 | O | AHOH W 191 | -0.661 | 10.220  | 11.106 | 0.50 | 11.59 | O |
| HETATM 2363 | O | BHOH W 191 | 0.854  | 10.581  | 9.516  | 0.50 | 14.63 | O |
| HETATM 2364 | O | HOH W 192  | 24.154 | -0.702  | -1.759 | 1.00 | 22.41 | O |
| HETATM 2365 | O | HOH W 193  | 16.818 | 24.376  | -3.955 | 1.00 | 34.13 | O |
| HETATM 2366 | O | HOH W 194  | 17.321 | 17.445  | -6.804 | 1.00 | 18.50 | O |
| HETATM 2367 | O | HOH W 195  | 23.464 | 20.494  | -0.390 | 1.00 | 18.27 | O |
| HETATM 2368 | O | HOH W 196  | 0.754  | -2.694  | 18.083 | 1.00 | 32.86 | O |
| HETATM 2369 | O | HOH W 197  | 4.763  | 2.195   | -3.253 | 1.00 | 51.07 | O |
| HETATM 2370 | O | HOH W 198  | 0.554  | 16.428  | -0.095 | 1.00 | 27.16 | O |
| HETATM 2371 | O | HOH W 199  | 13.815 | 18.188  | 48.888 | 1.00 | 25.56 | O |
| HETATM 2372 | O | HOH W 200  | 16.807 | -9.780  | -5.855 | 1.00 | 45.45 | O |



|             |   |            |        |         |        |      |       |   |
|-------------|---|------------|--------|---------|--------|------|-------|---|
| HETATM 2373 | O | HOH W 201  | 9.859  | 4.658   | -6.485 | 1.00 | 24.81 | O |
| HETATM 2374 | O | HOH W 202  | 12.096 | 29.900  | 3.665  | 1.00 | 30.56 | O |
| HETATM 2375 | O | HOH W 203  | 1.791  | 14.766  | -5.406 | 1.00 | 31.88 | O |
| HETATM 2376 | O | HOH W 204  | 7.937  | -5.740  | -6.211 | 1.00 | 26.19 | O |
| HETATM 2377 | O | HOH W 205  | 7.745  | -3.495  | -8.166 | 1.00 | 43.88 | O |
| HETATM 2378 | O | HOH W 206  | 23.952 | -4.705  | 27.550 | 1.00 | 37.02 | O |
| HETATM 2379 | O | HOH W 207  | 27.822 | -1.317  | 31.536 | 1.00 | 44.32 | O |
| HETATM 2380 | O | HOH W 208  | 27.387 | 0.834   | 4.107  | 1.00 | 34.80 | O |
| HETATM 2381 | O | HOH W 209  | 16.520 | 27.925  | 1.426  | 1.00 | 39.18 | O |
| HETATM 2382 | O | HOH W 210  | 2.532  | 14.867  | 41.636 | 1.00 | 36.44 | O |
| HETATM 2383 | O | HOH W 211  | 29.104 | -0.164  | 1.723  | 1.00 | 25.94 | O |
| HETATM 2384 | O | HOH W 212  | 23.760 | -10.088 | 3.245  | 1.00 | 20.73 | O |
| HETATM 2385 | O | AHOH W 213 | 2.651  | 23.032  | 11.137 | 0.50 | 9.31  | O |
| HETATM 2386 | O | BHOH W 213 | 0.930  | 23.253  | 10.494 | 0.50 | 18.30 | O |
| HETATM 2387 | O | HOH W 214  | 6.545  | 17.484  | -9.360 | 1.00 | 30.72 | O |
| HETATM 2388 | O | HOH W 215  | 24.262 | 9.750   | 9.744  | 1.00 | 25.92 | O |
| HETATM 2389 | O | HOH W 216  | -0.004 | 22.448  | -6.347 | 0.50 | 26.70 | O |
| HETATM 2390 | O | HOH W 217  | 2.132  | 6.355   | 6.914  | 1.00 | 31.90 | O |
| HETATM 2391 | O | HOH W 218  | 0.947  | 23.062  | 1.967  | 1.00 | 31.19 | O |
| HETATM 2392 | O | HOH W 219  | -0.337 | 15.439  | 19.904 | 1.00 | 27.32 | O |
| HETATM 2393 | O | HOH W 220  | 31.340 | 14.740  | 8.471  | 1.00 | 31.26 | O |
| HETATM 2394 | O | HOH W 221  | 16.911 | -11.180 | 23.407 | 1.00 | 38.71 | O |
| HETATM 2395 | O | HOH W 222  | 6.037  | 1.456   | 16.534 | 1.00 | 32.30 | O |
| HETATM 2396 | O | HOH W 223  | 7.322  | 29.046  | 14.049 | 1.00 | 39.88 | O |
| HETATM 2397 | O | HOH W 224  | 30.414 | 14.428  | 1.001  | 1.00 | 37.71 | O |
| HETATM 2398 | O | HOH W 225  | 1.389  | 10.725  | 24.247 | 1.00 | 44.67 | O |
| HETATM 2399 | O | HOH W 226  | 5.745  | -5.190  | 31.965 | 1.00 | 39.61 | O |
| HETATM 2400 | O | HOH W 227  | 32.571 | 16.602  | 6.127  | 1.00 | 36.58 | O |

TER

END
